# Supplementary material
Source: PubMed Central journal article supplement (PMC2665030)

**Asymmetric Synthesis of Bicyclo[4.3.1] and [3.3.2]decadienes via [6+3]  
Trimethylenemethane Cycloaddition with Tropones**

Barry M. Trost\*, Patrick J. McDougall, Olaf Hartmann, and Peter Wathen

*Department of Chemistry, Stanford University, Stanford, California 94305-5080*

**<sup>1</sup>H and <sup>13</sup>C NMR Spectra for  
Compounds 4a-i and 5a, d, and f**

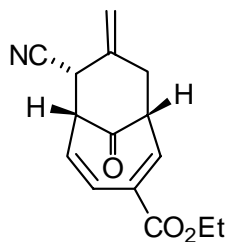

TMM adduct **4a**  
400 MHz, CDCl<sub>3</sub>

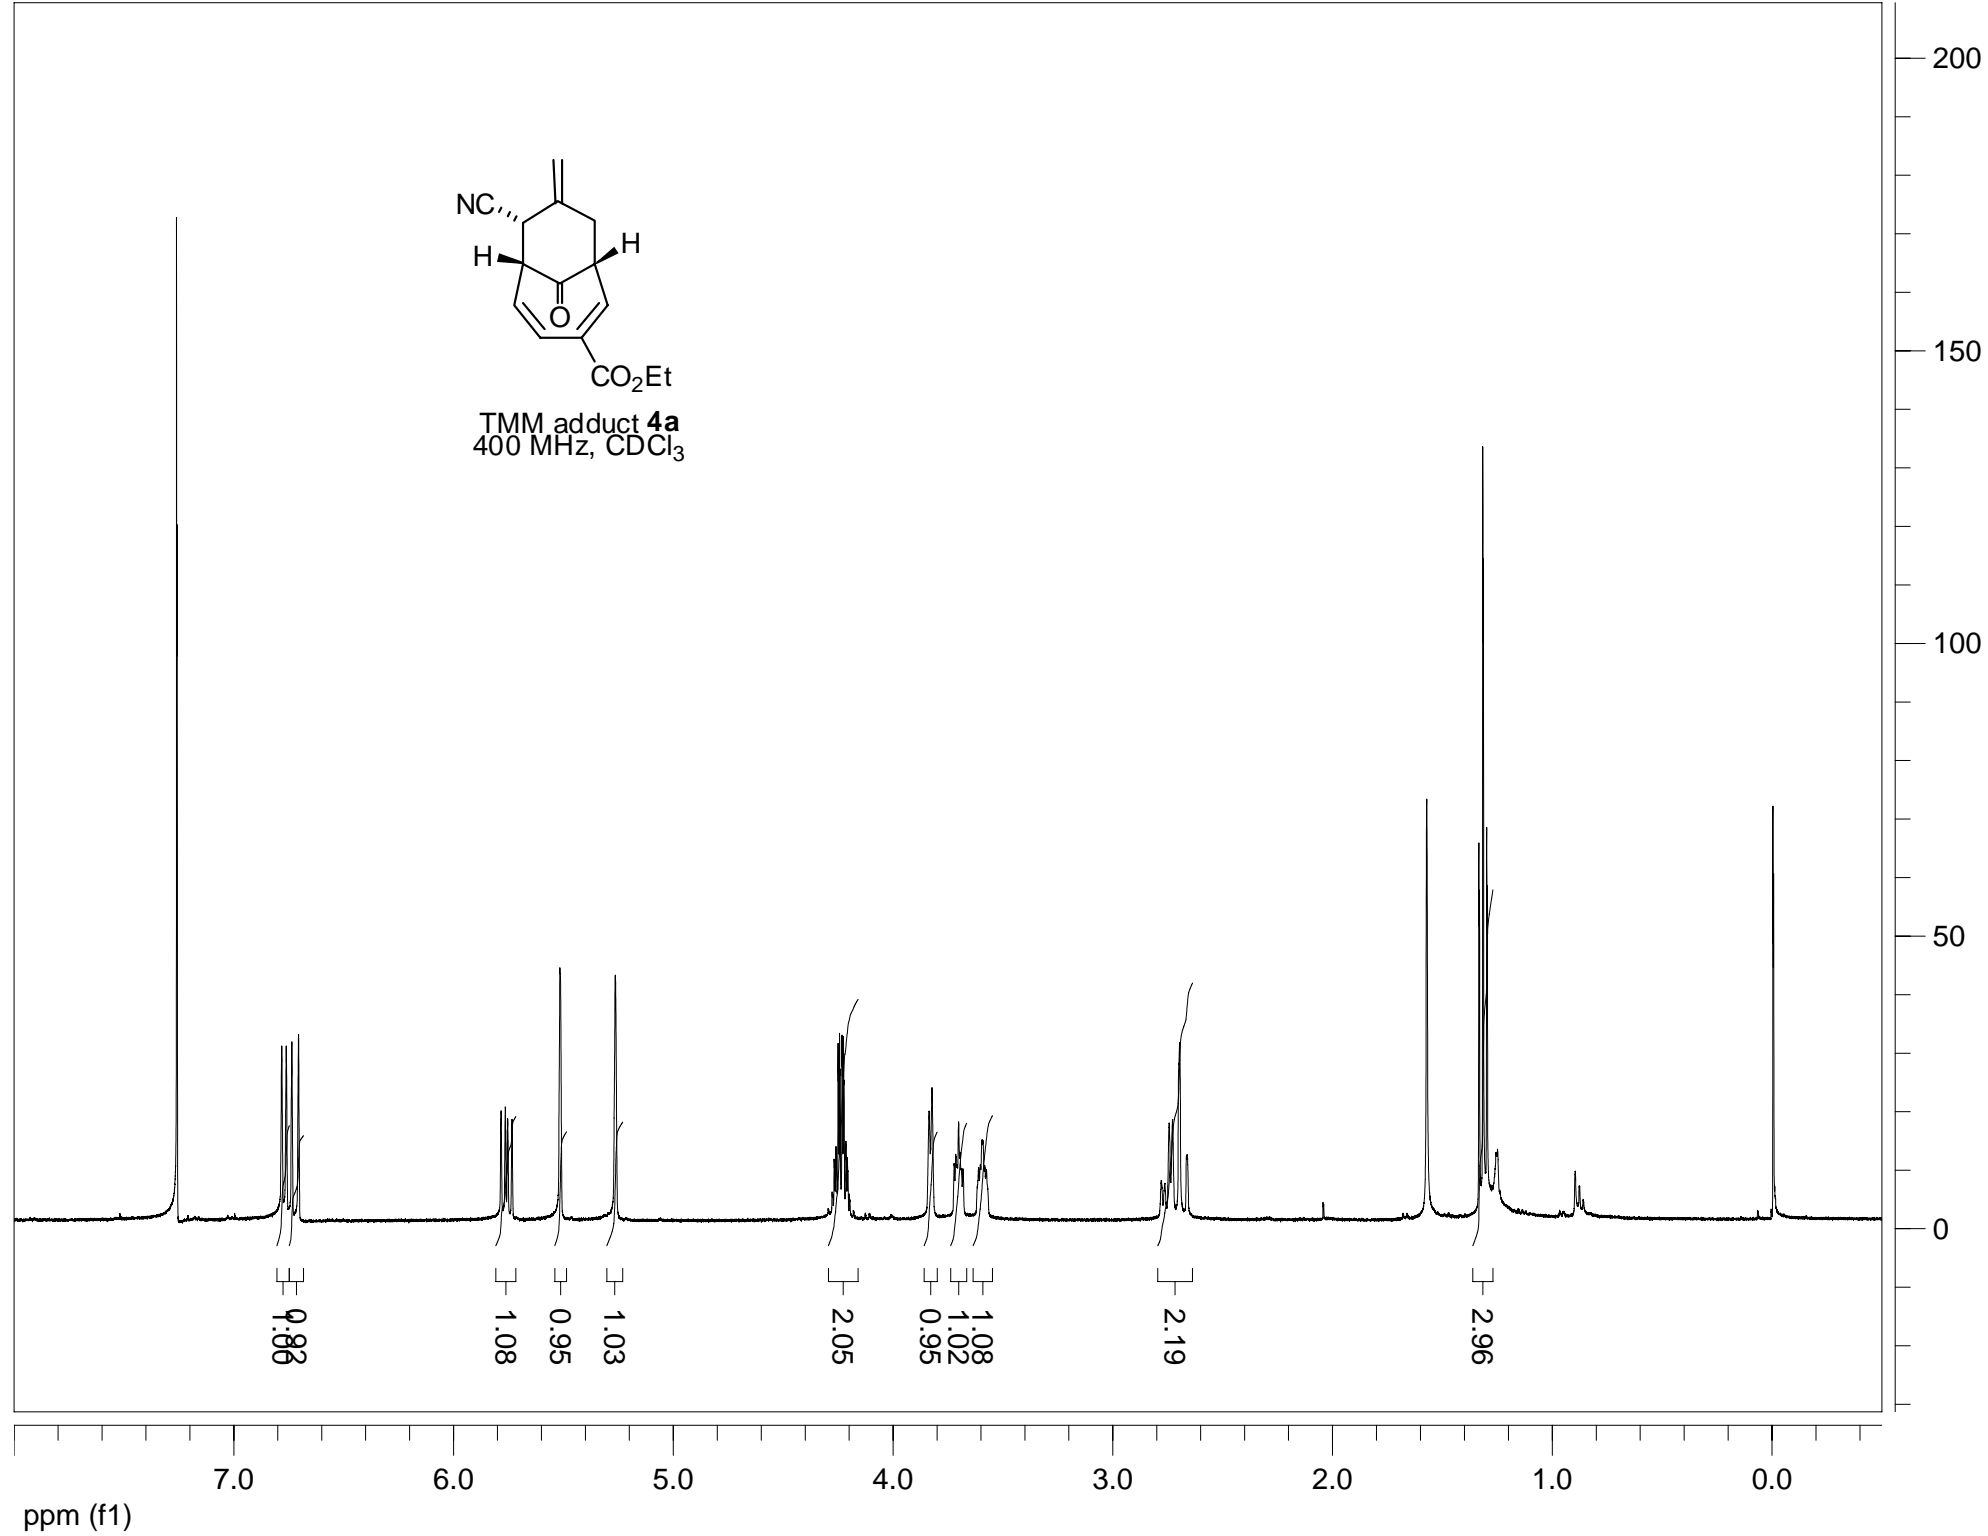

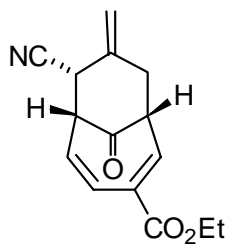

TMM adduct 4a  
100 MHz, CDCl<sub>3</sub>

202.652

166.213

135.401

132.938

129.580

126.707

122.817

119.942

115.970

61.885

54.174

52.869

40.927

39.402

14.345

6000

5000

4000

3000

2000

1000

0

200

150

100

50

ppm (f1)

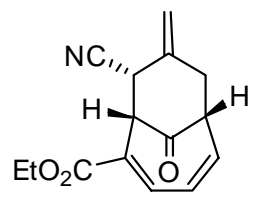

TMM adduct 4b  
400 MHz, CDCl<sub>3</sub>

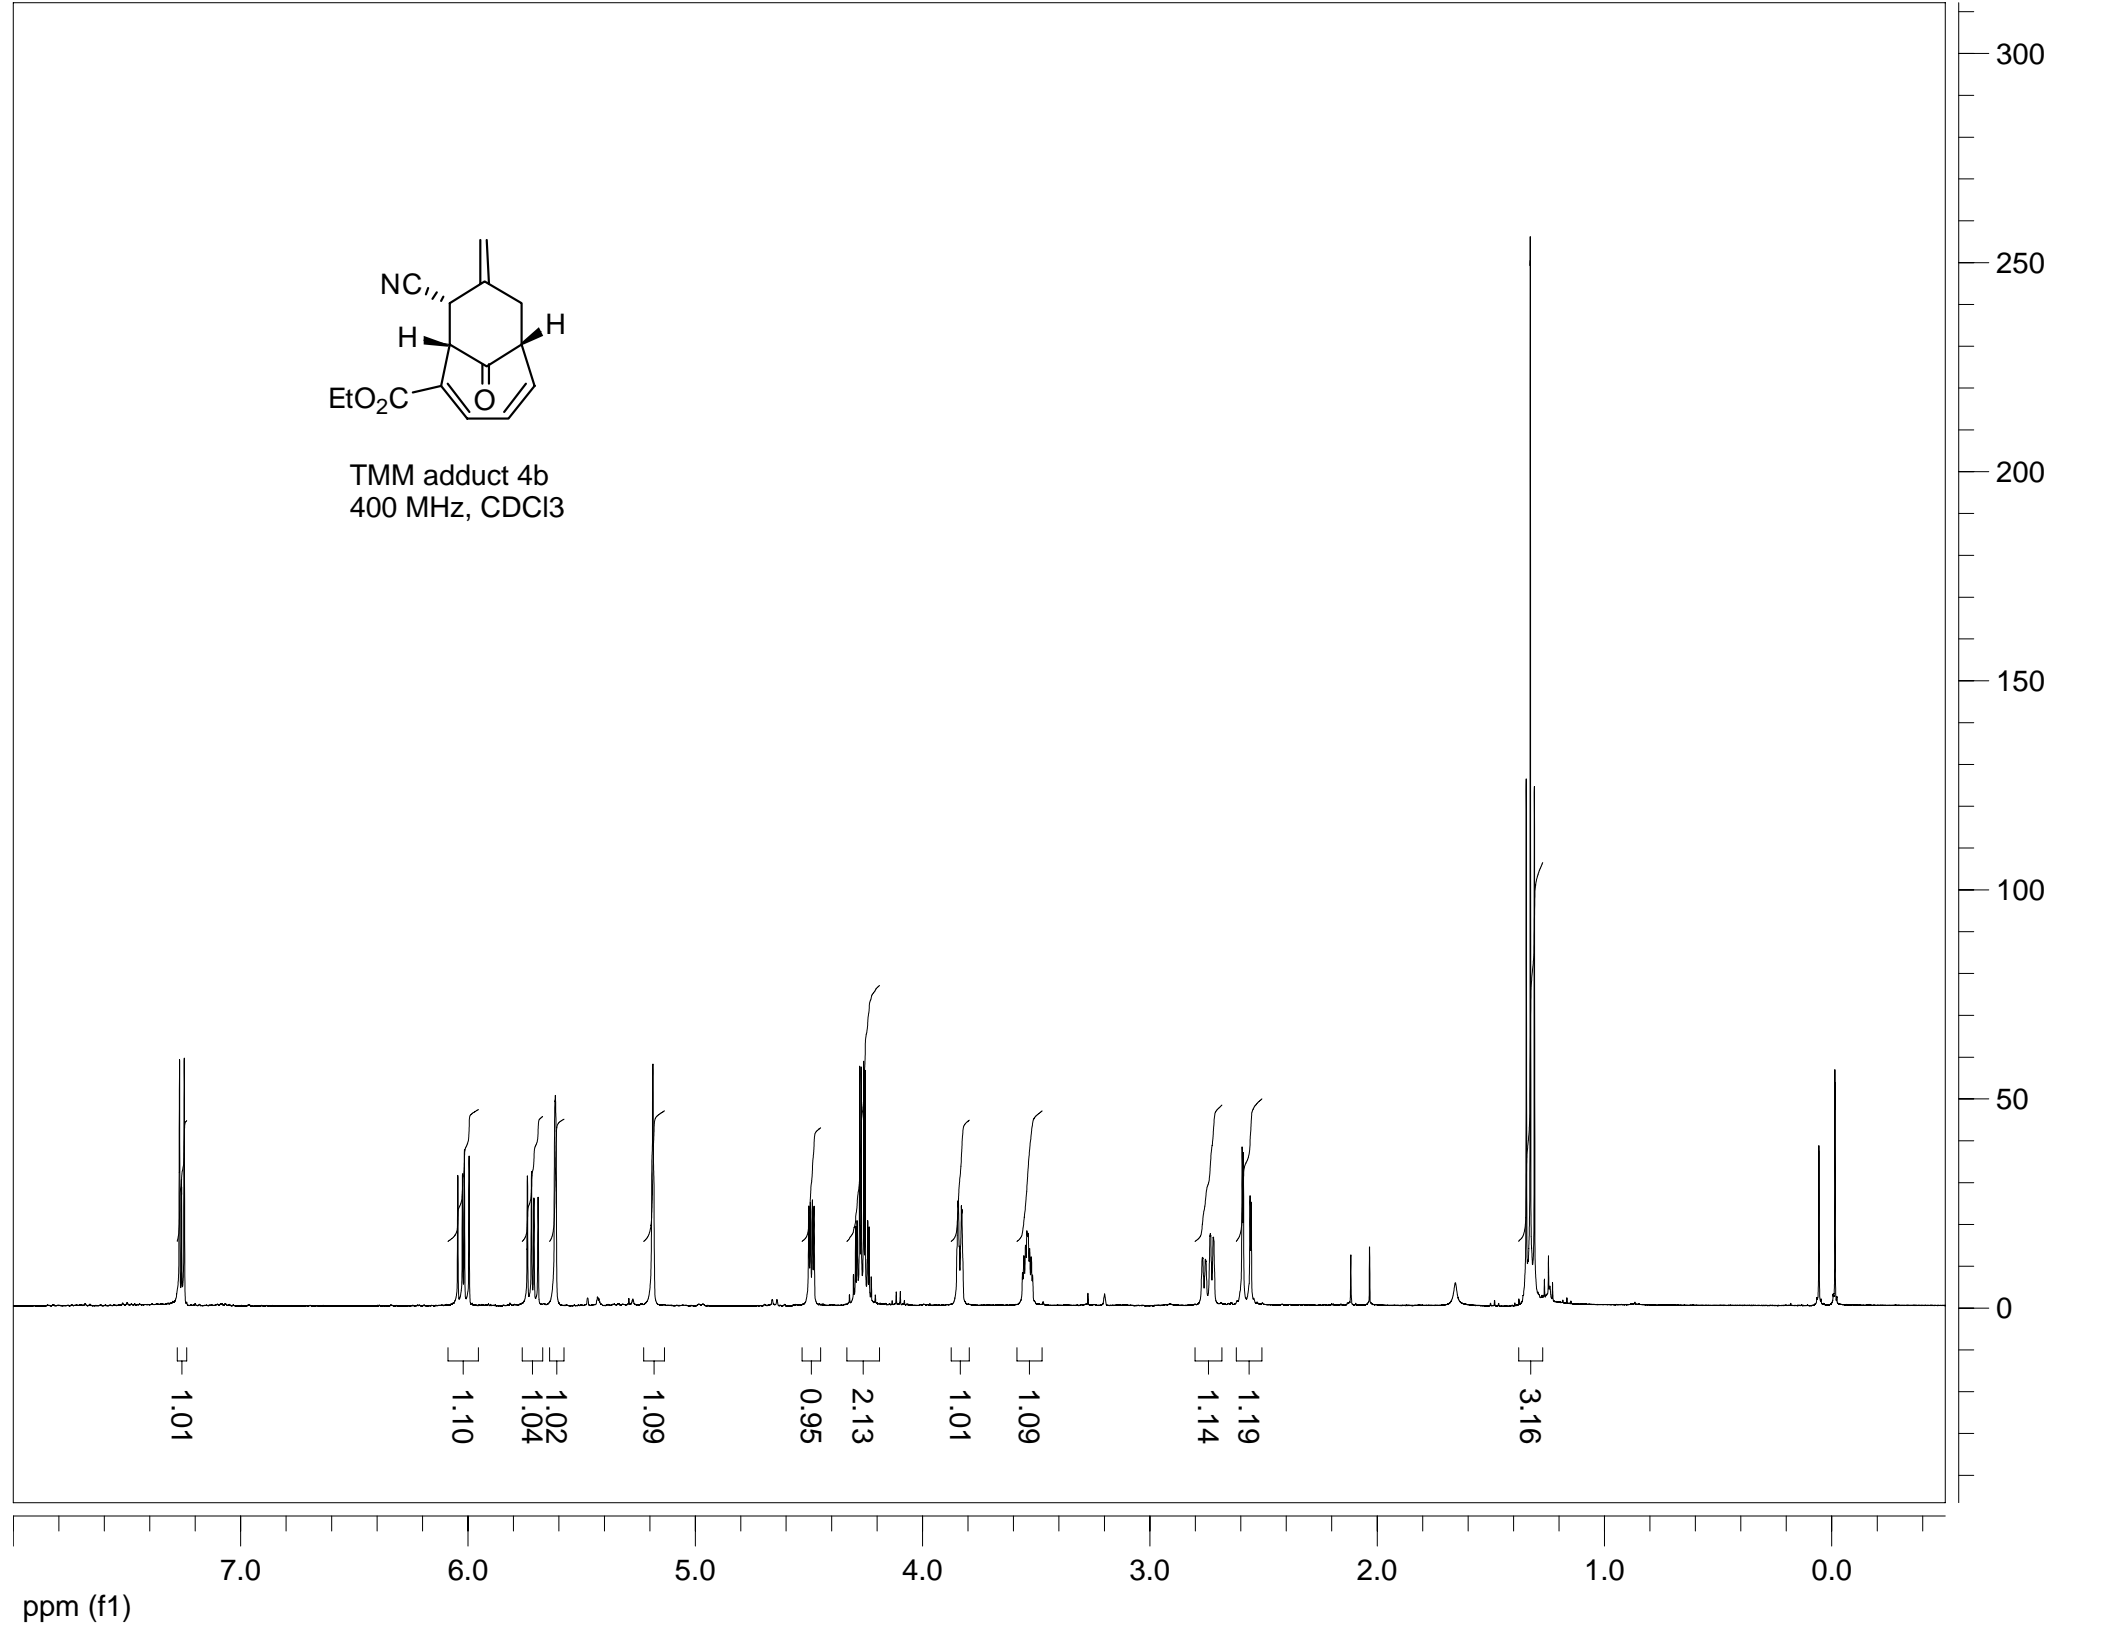

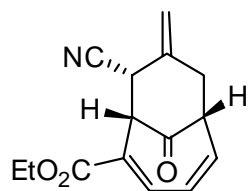

TMM adduct 4b  
100 MHz, CDCl<sub>3</sub>

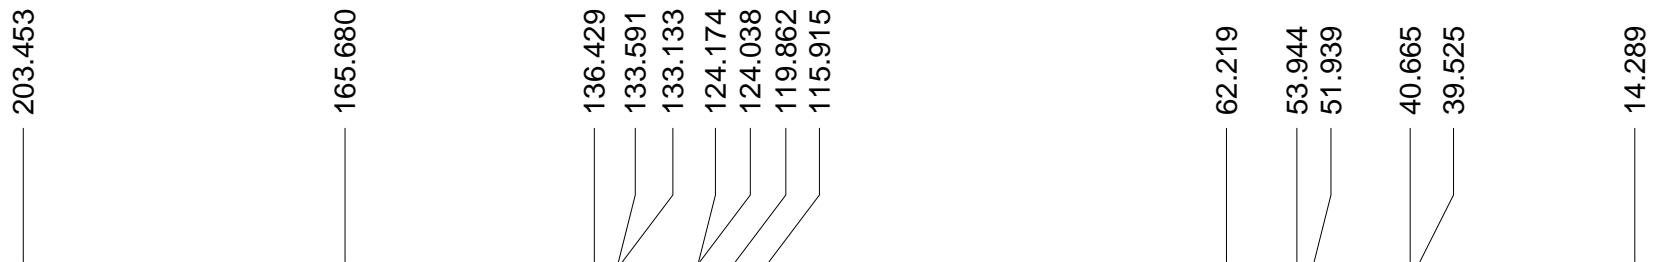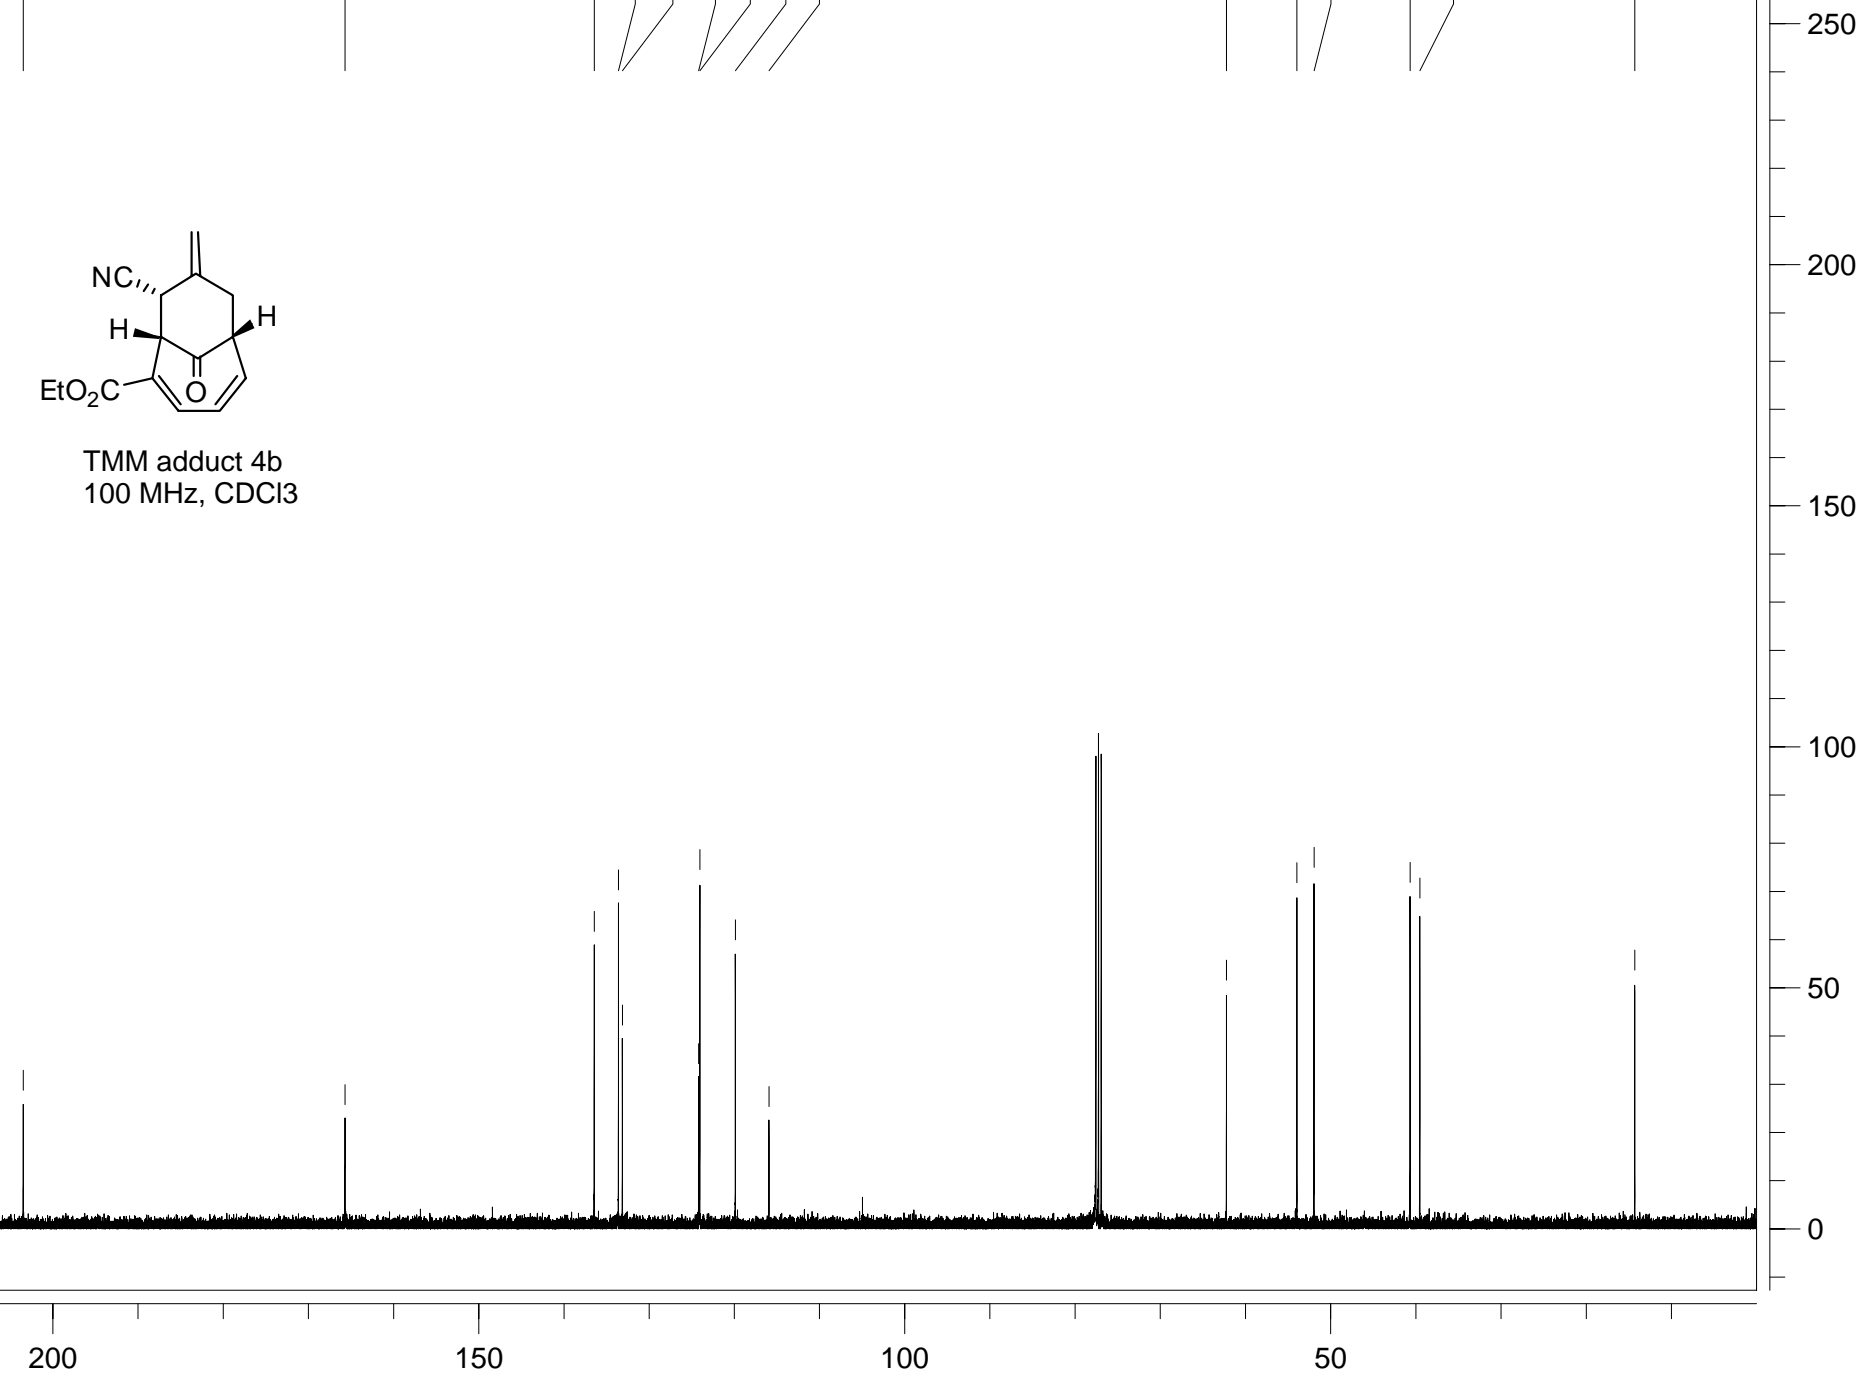

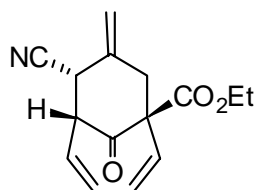

TMM adduct 4c  
400 MHz, CDCl<sub>3</sub>

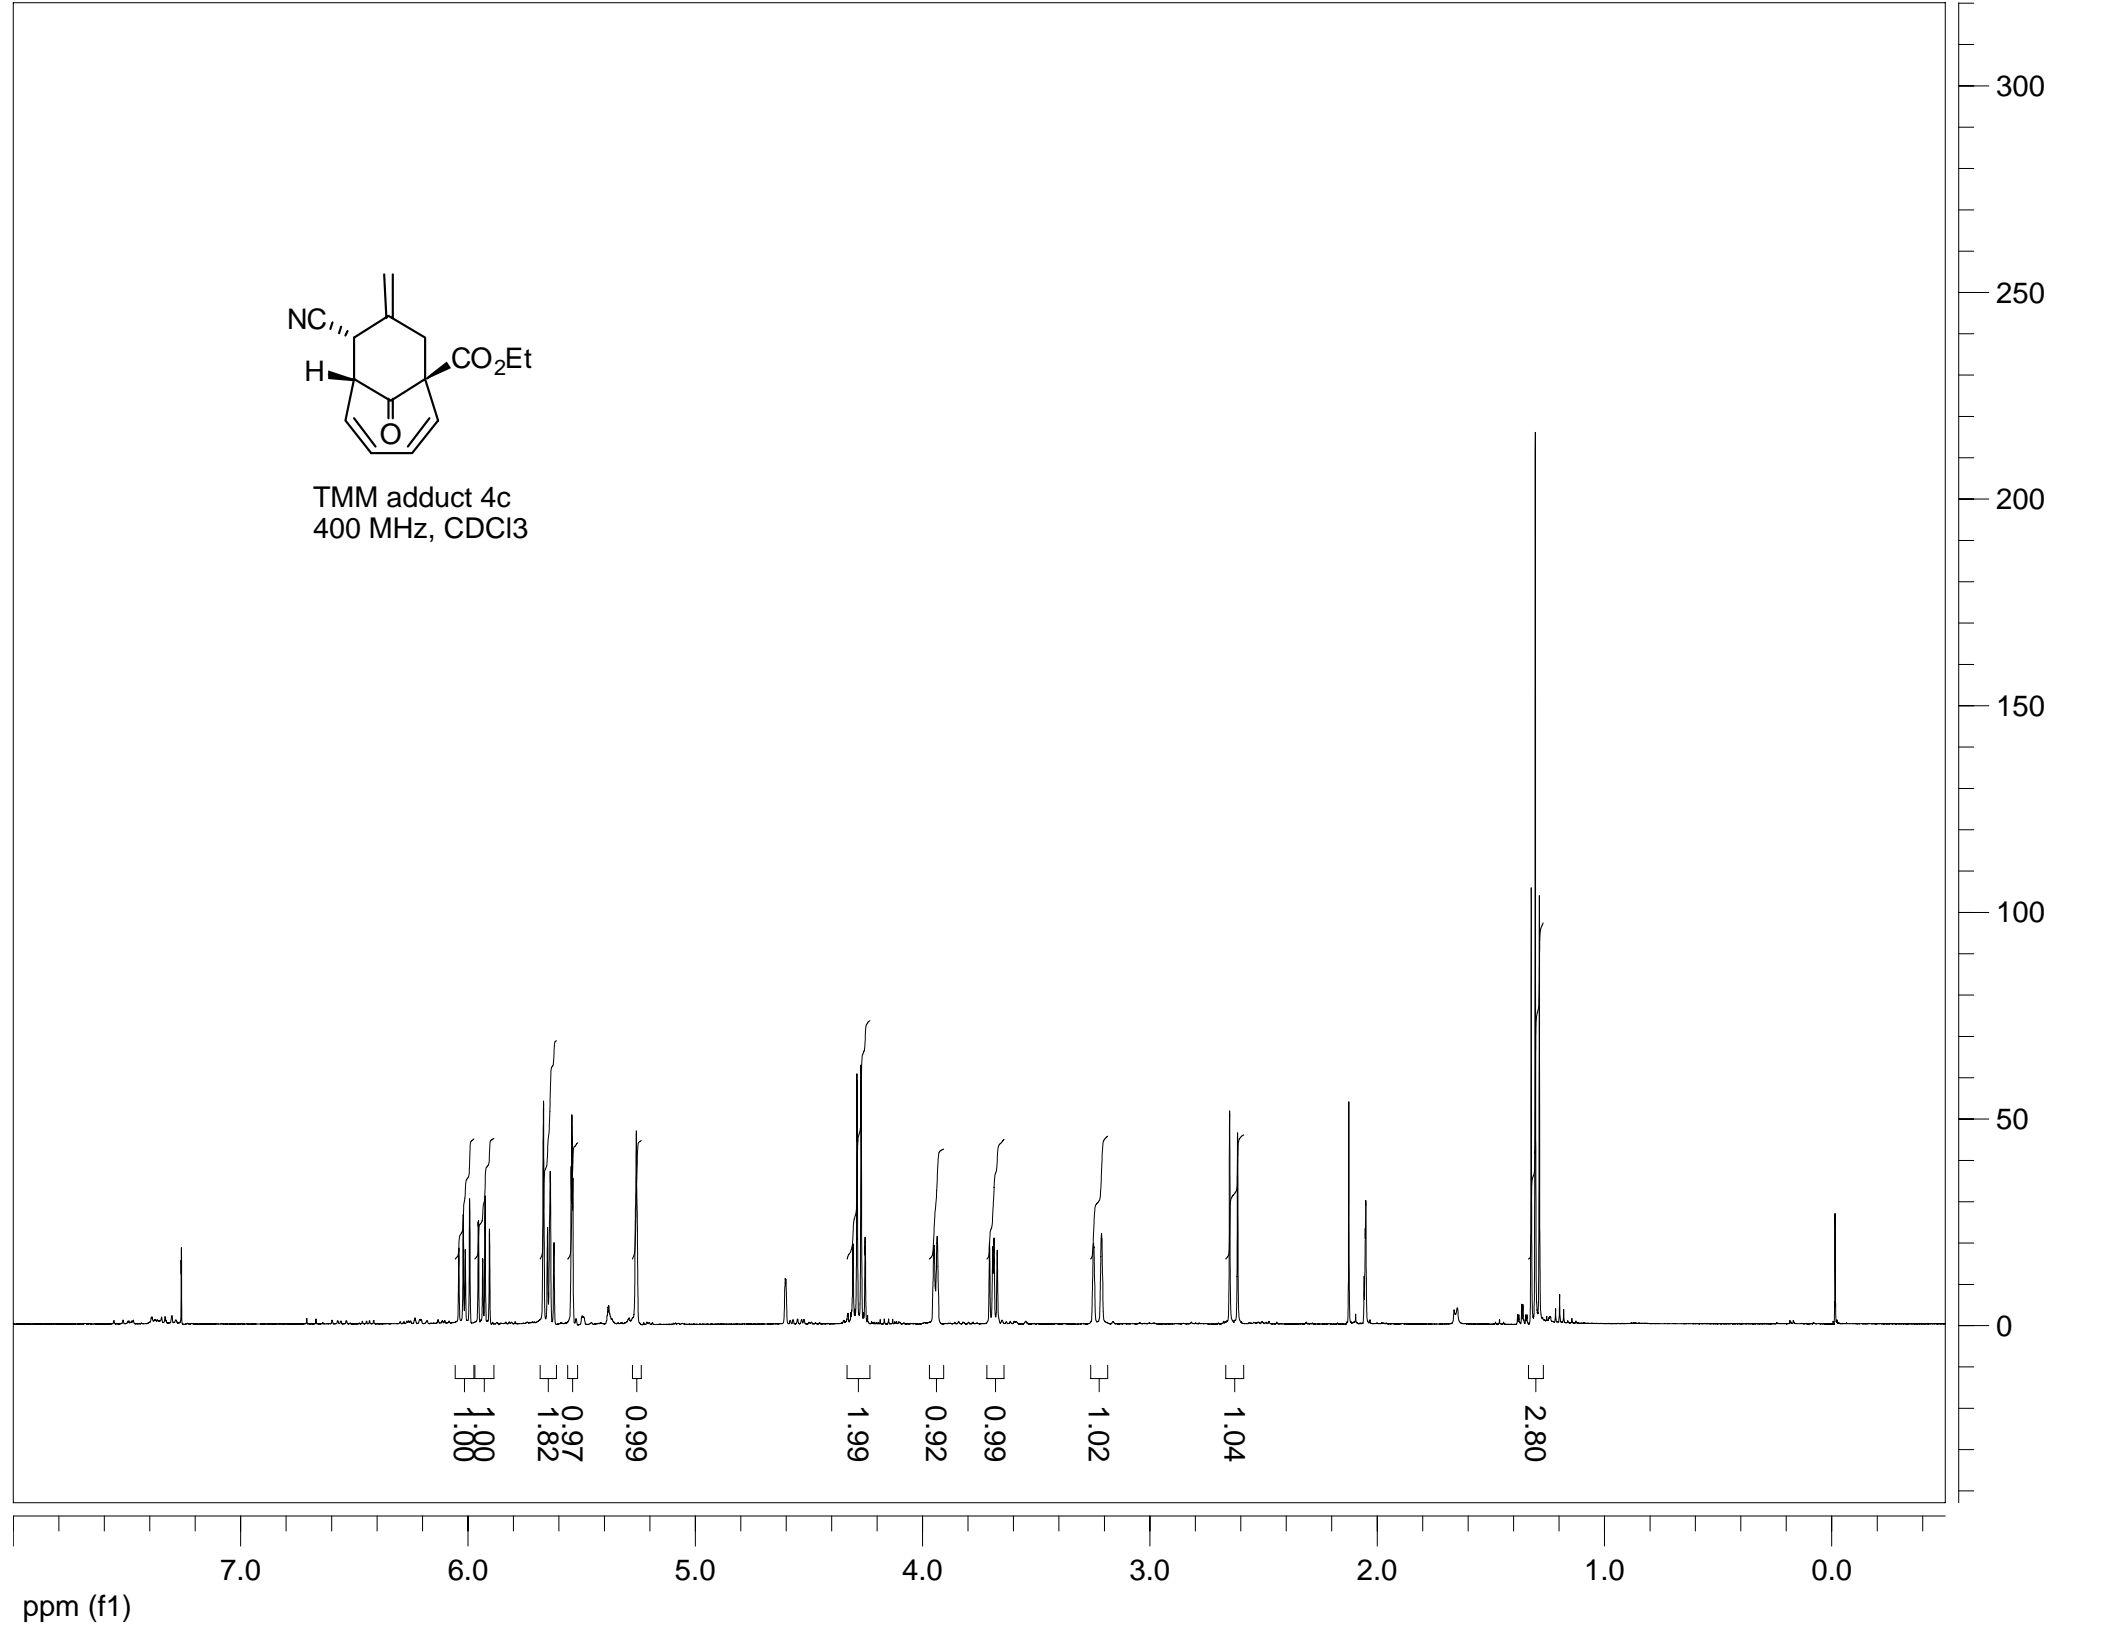

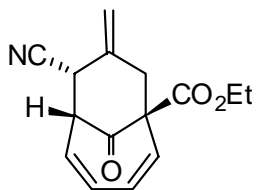

TMM adduct 4c  
100 MHz, CDCl<sub>3</sub>

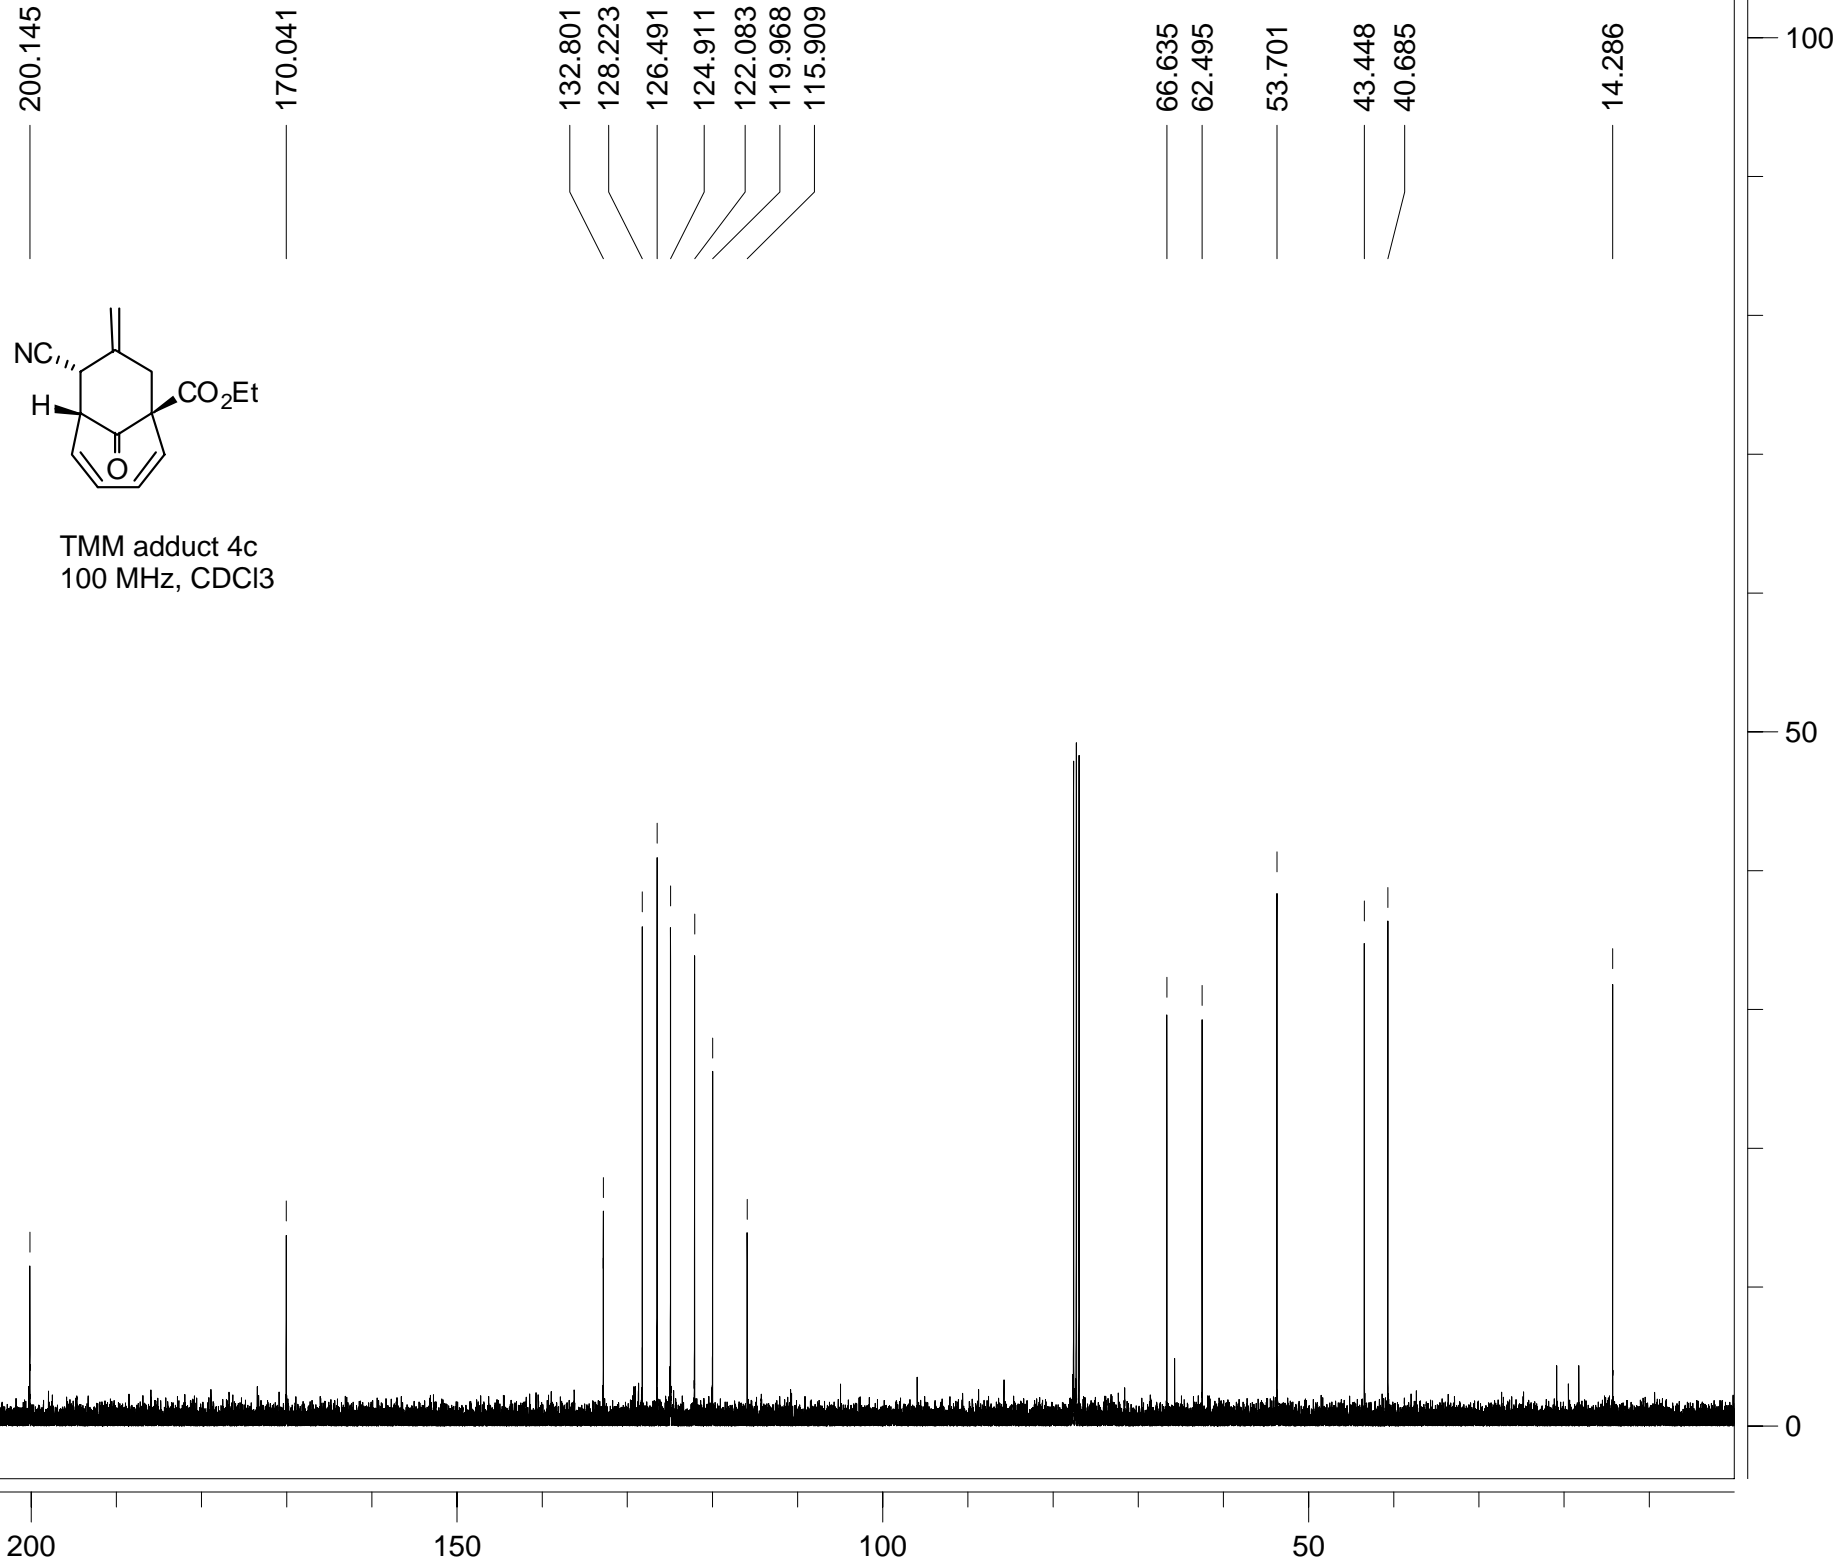

ppm (f1)

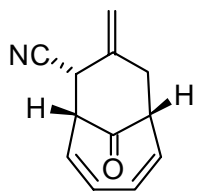

TMM adduct 4d  
400 MHz, CDCl<sub>3</sub>

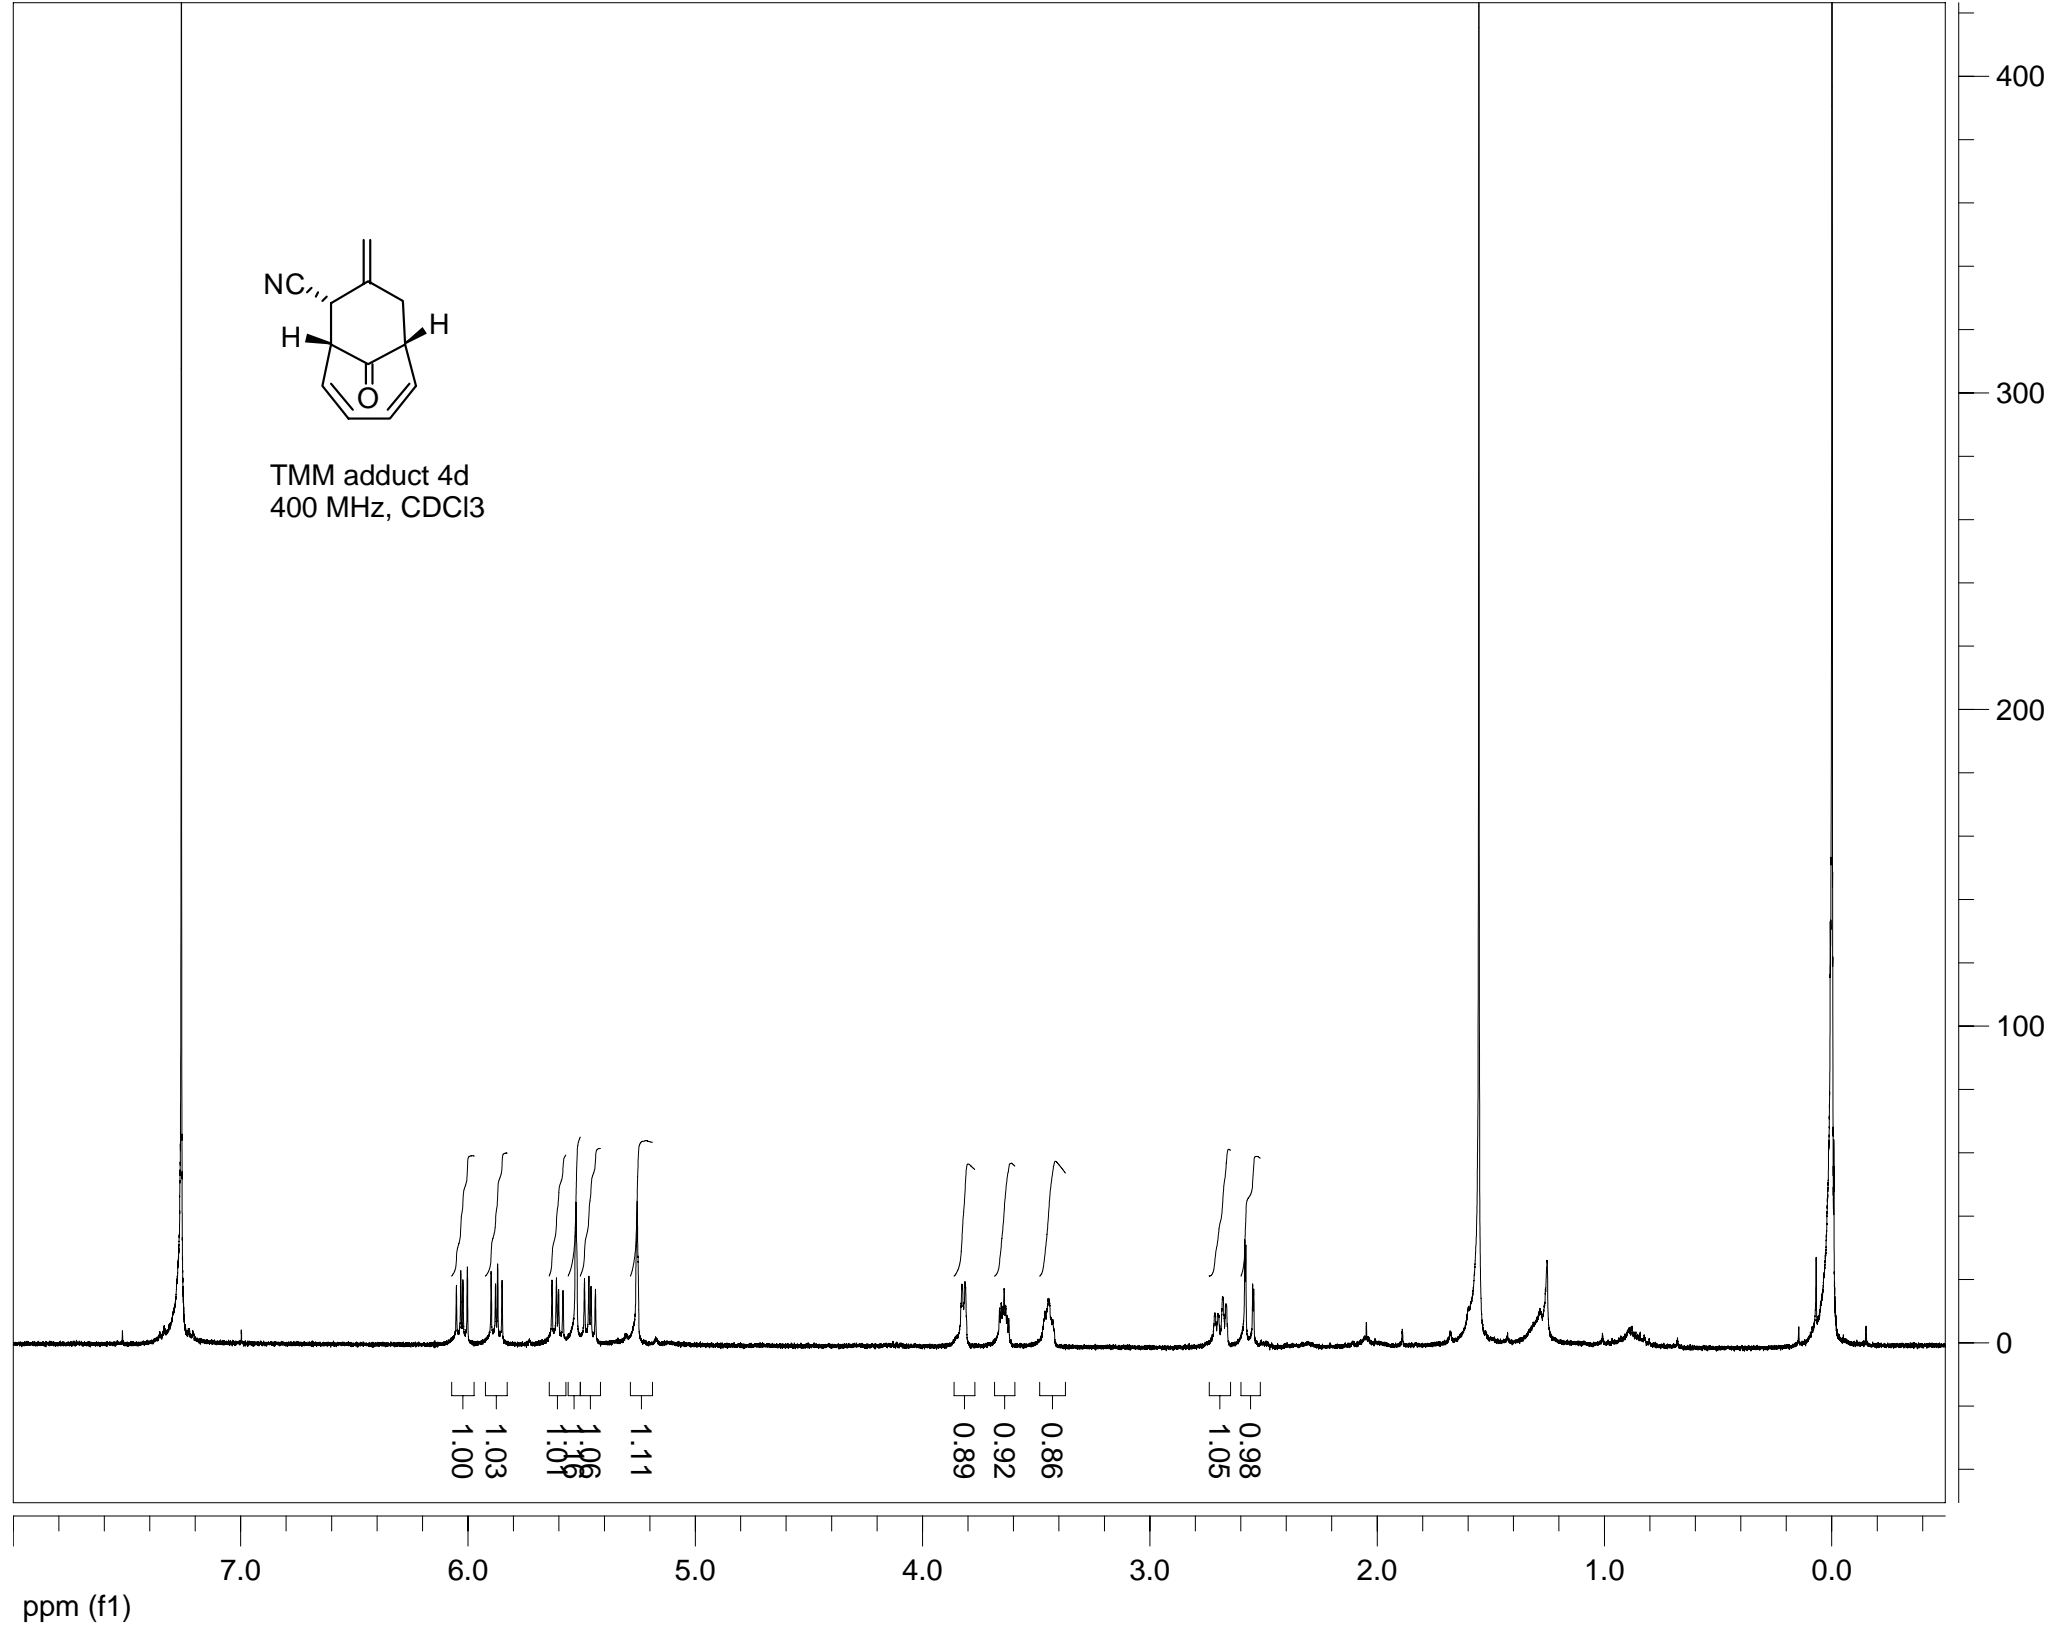



204.324

133.637  
128.546  
126.693  
125.066  
121.438  
119.168  
116.288

54.156  
53.480  
40.908  
39.904

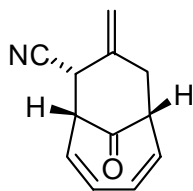

TMM adduct 4d  
100 MHz, CDCl<sub>3</sub>

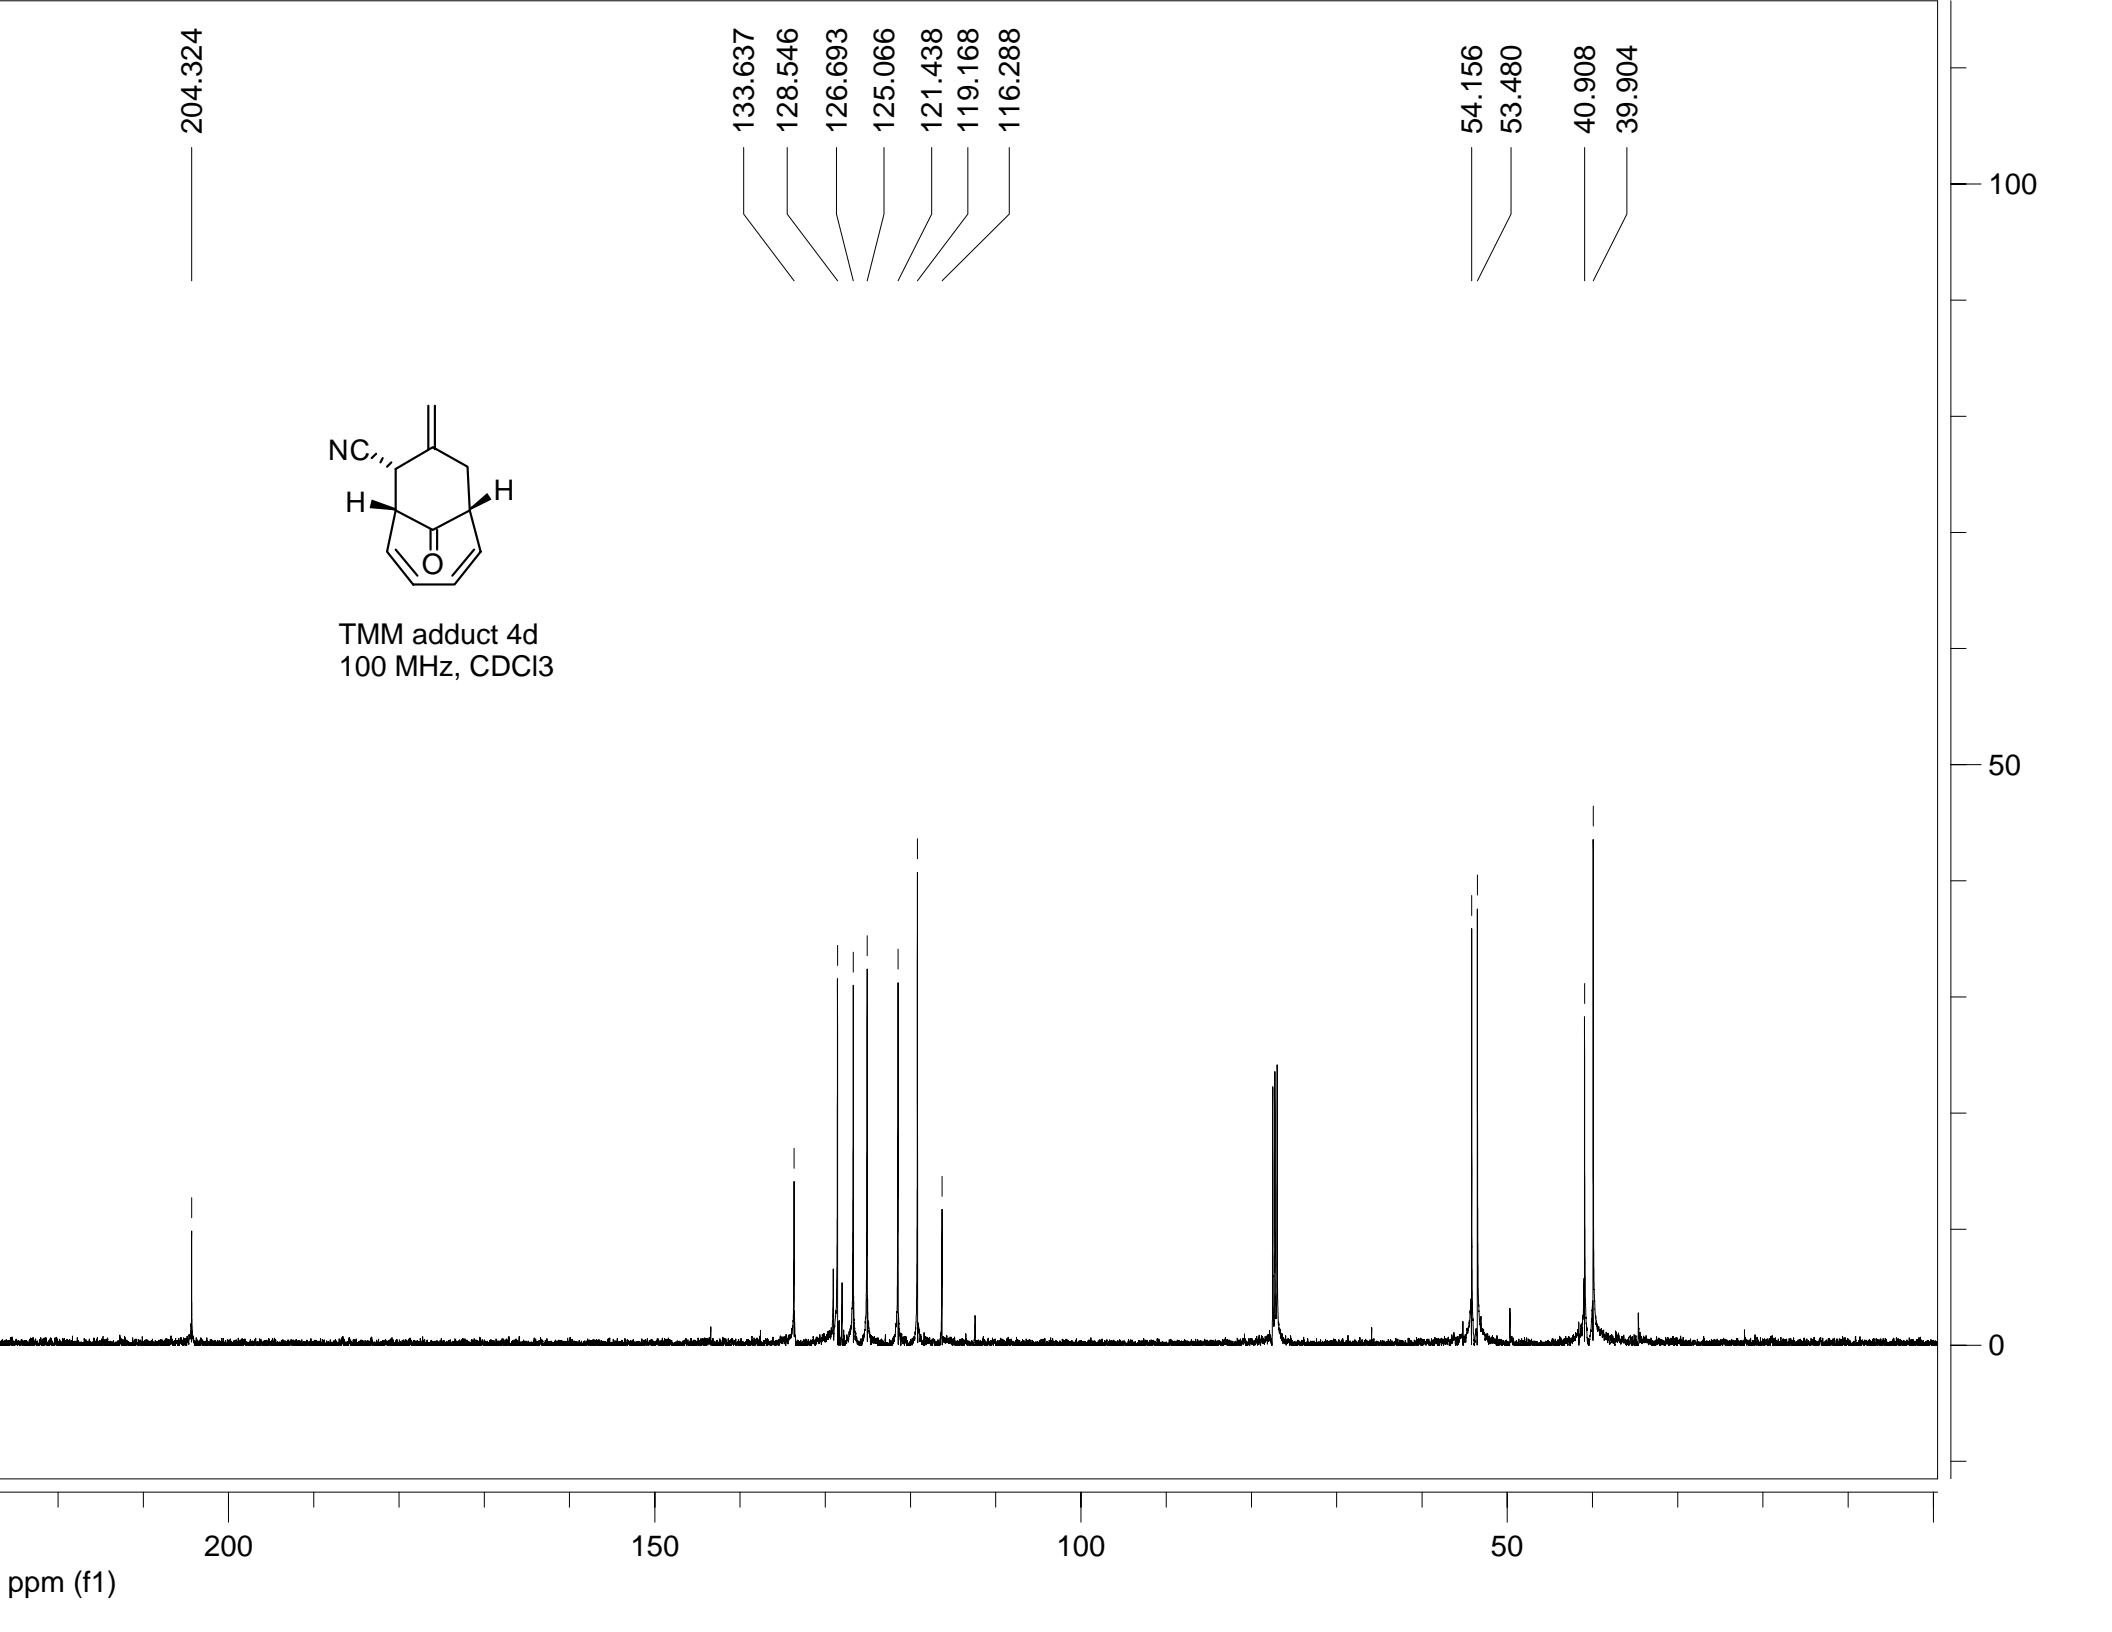

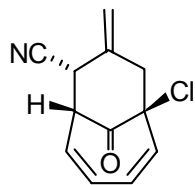

TMM adduct 4e  
400 MHz, CDCl<sub>3</sub>

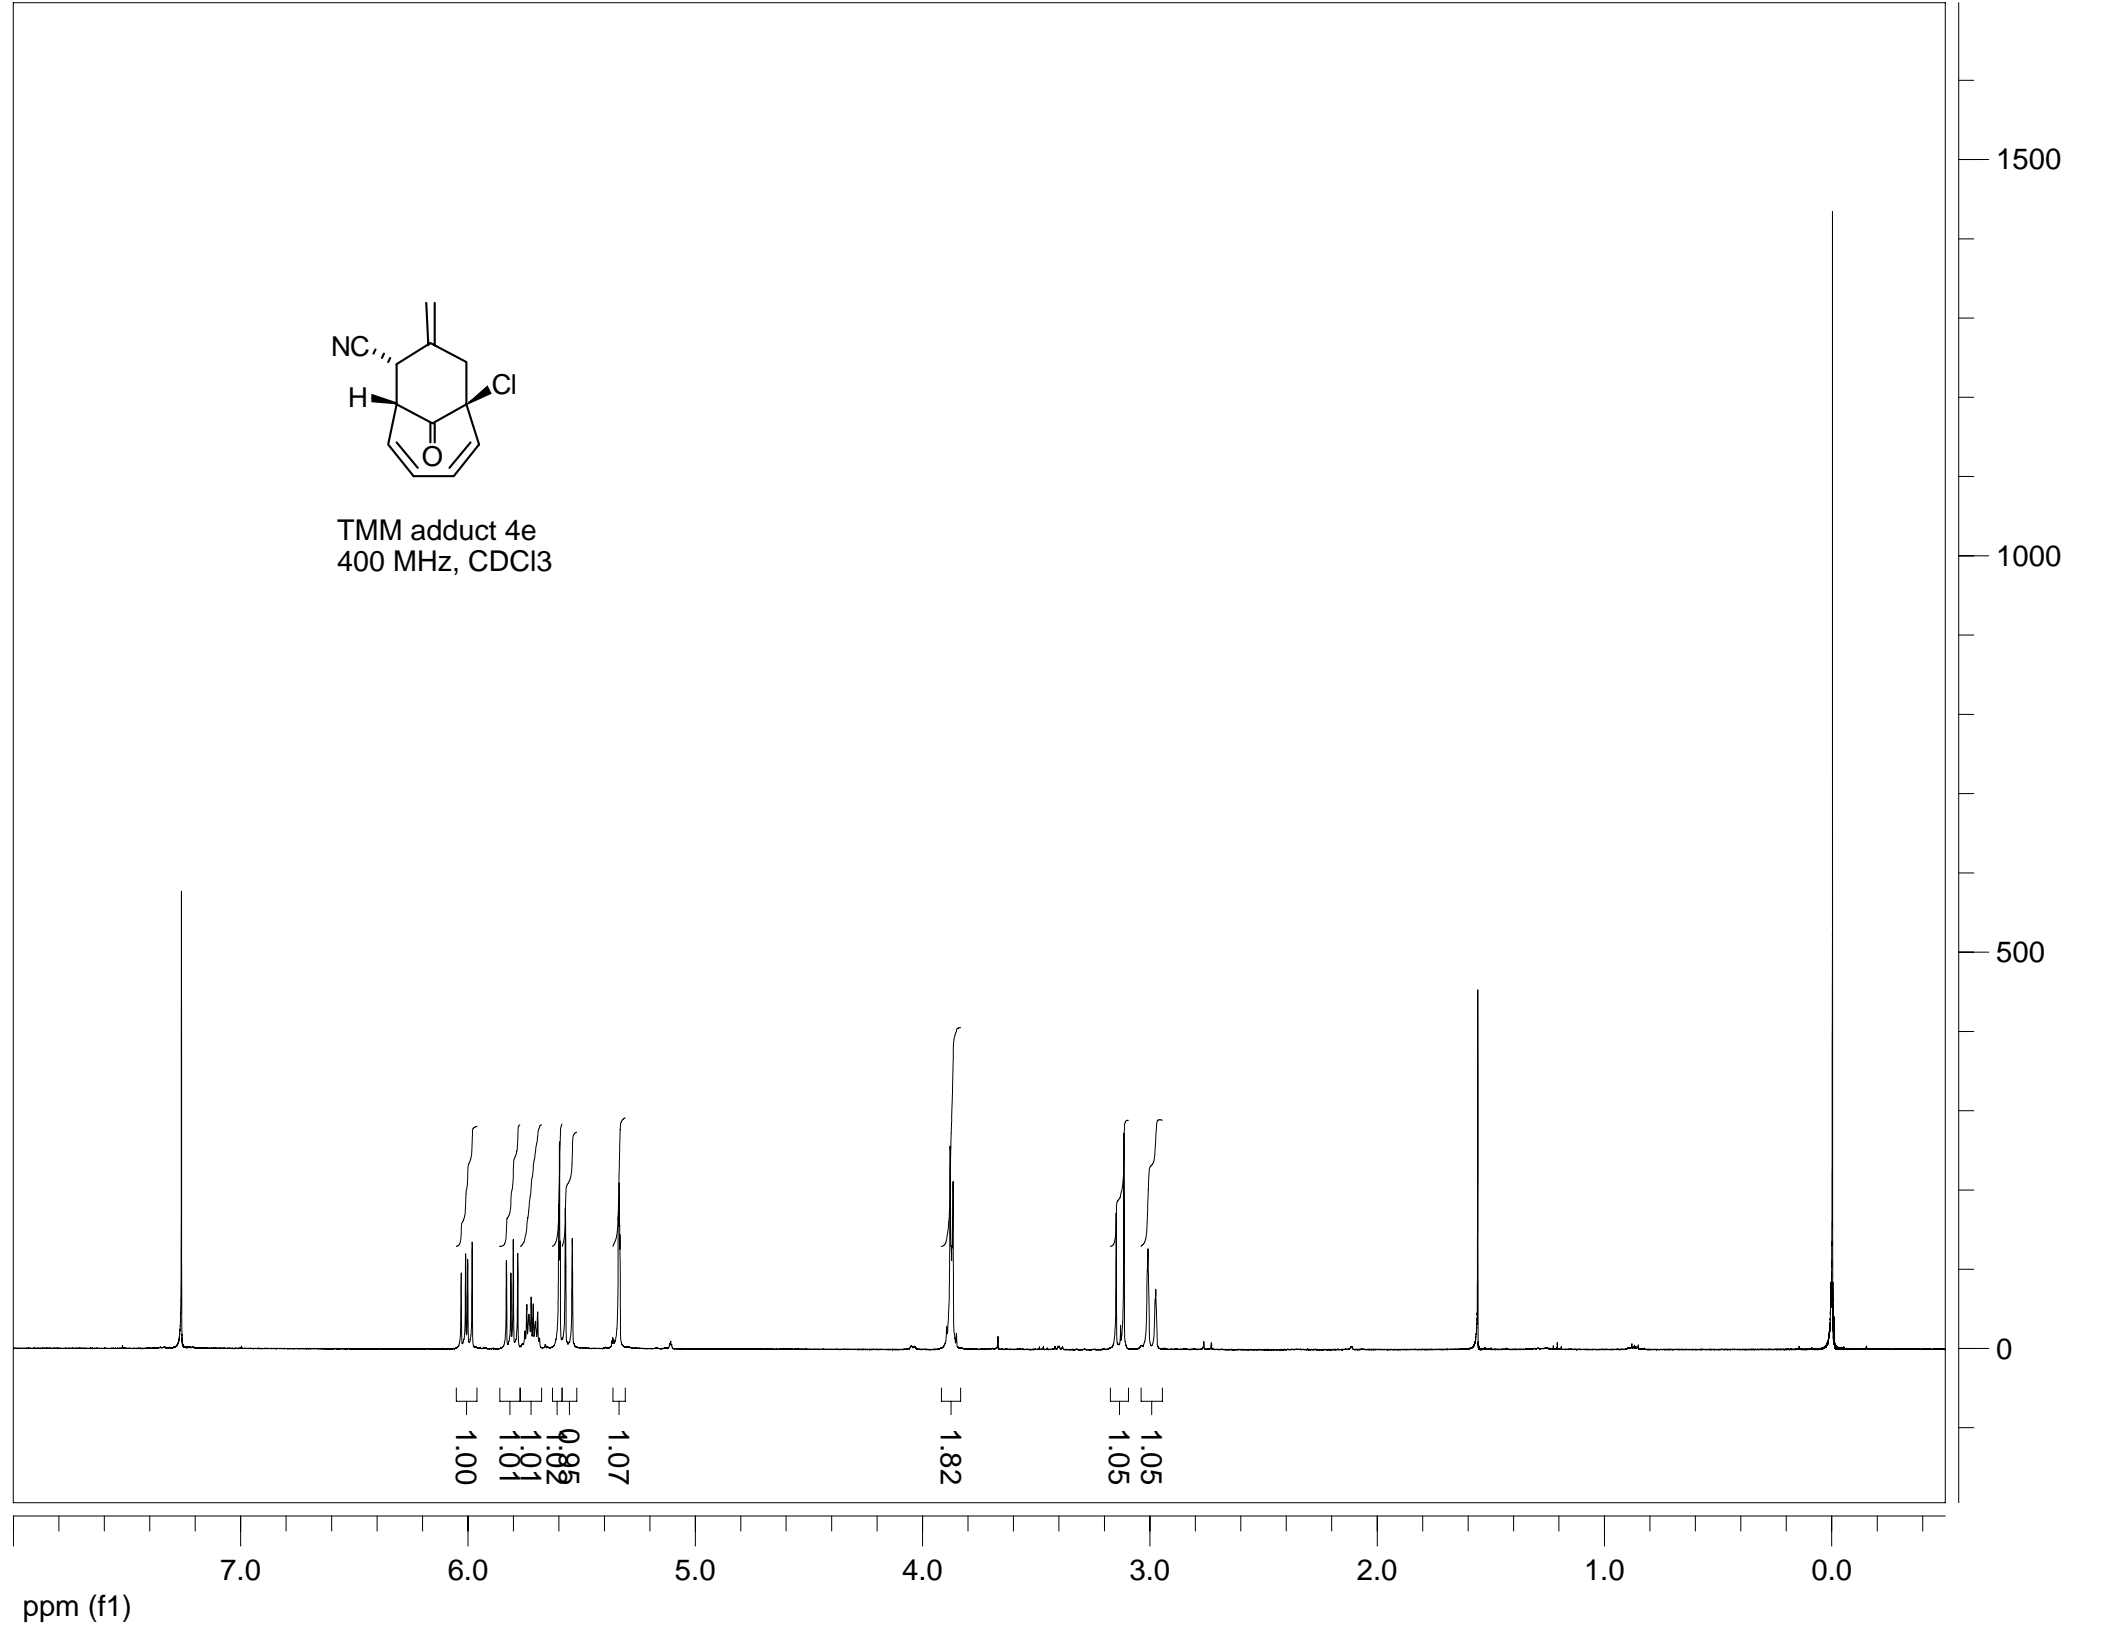

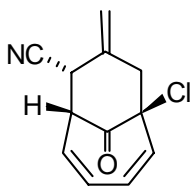

TMM adduct 4e  
100 MHz, CDCl<sub>3</sub>

195.838

133.078  
130.233  
130.210  
127.656  
127.632  
123.494  
123.028  
120.554  
115.404

52.619  
51.444  
40.740

200  
150  
100  
50  
0

200 150 100 50 0

ppm (f1)

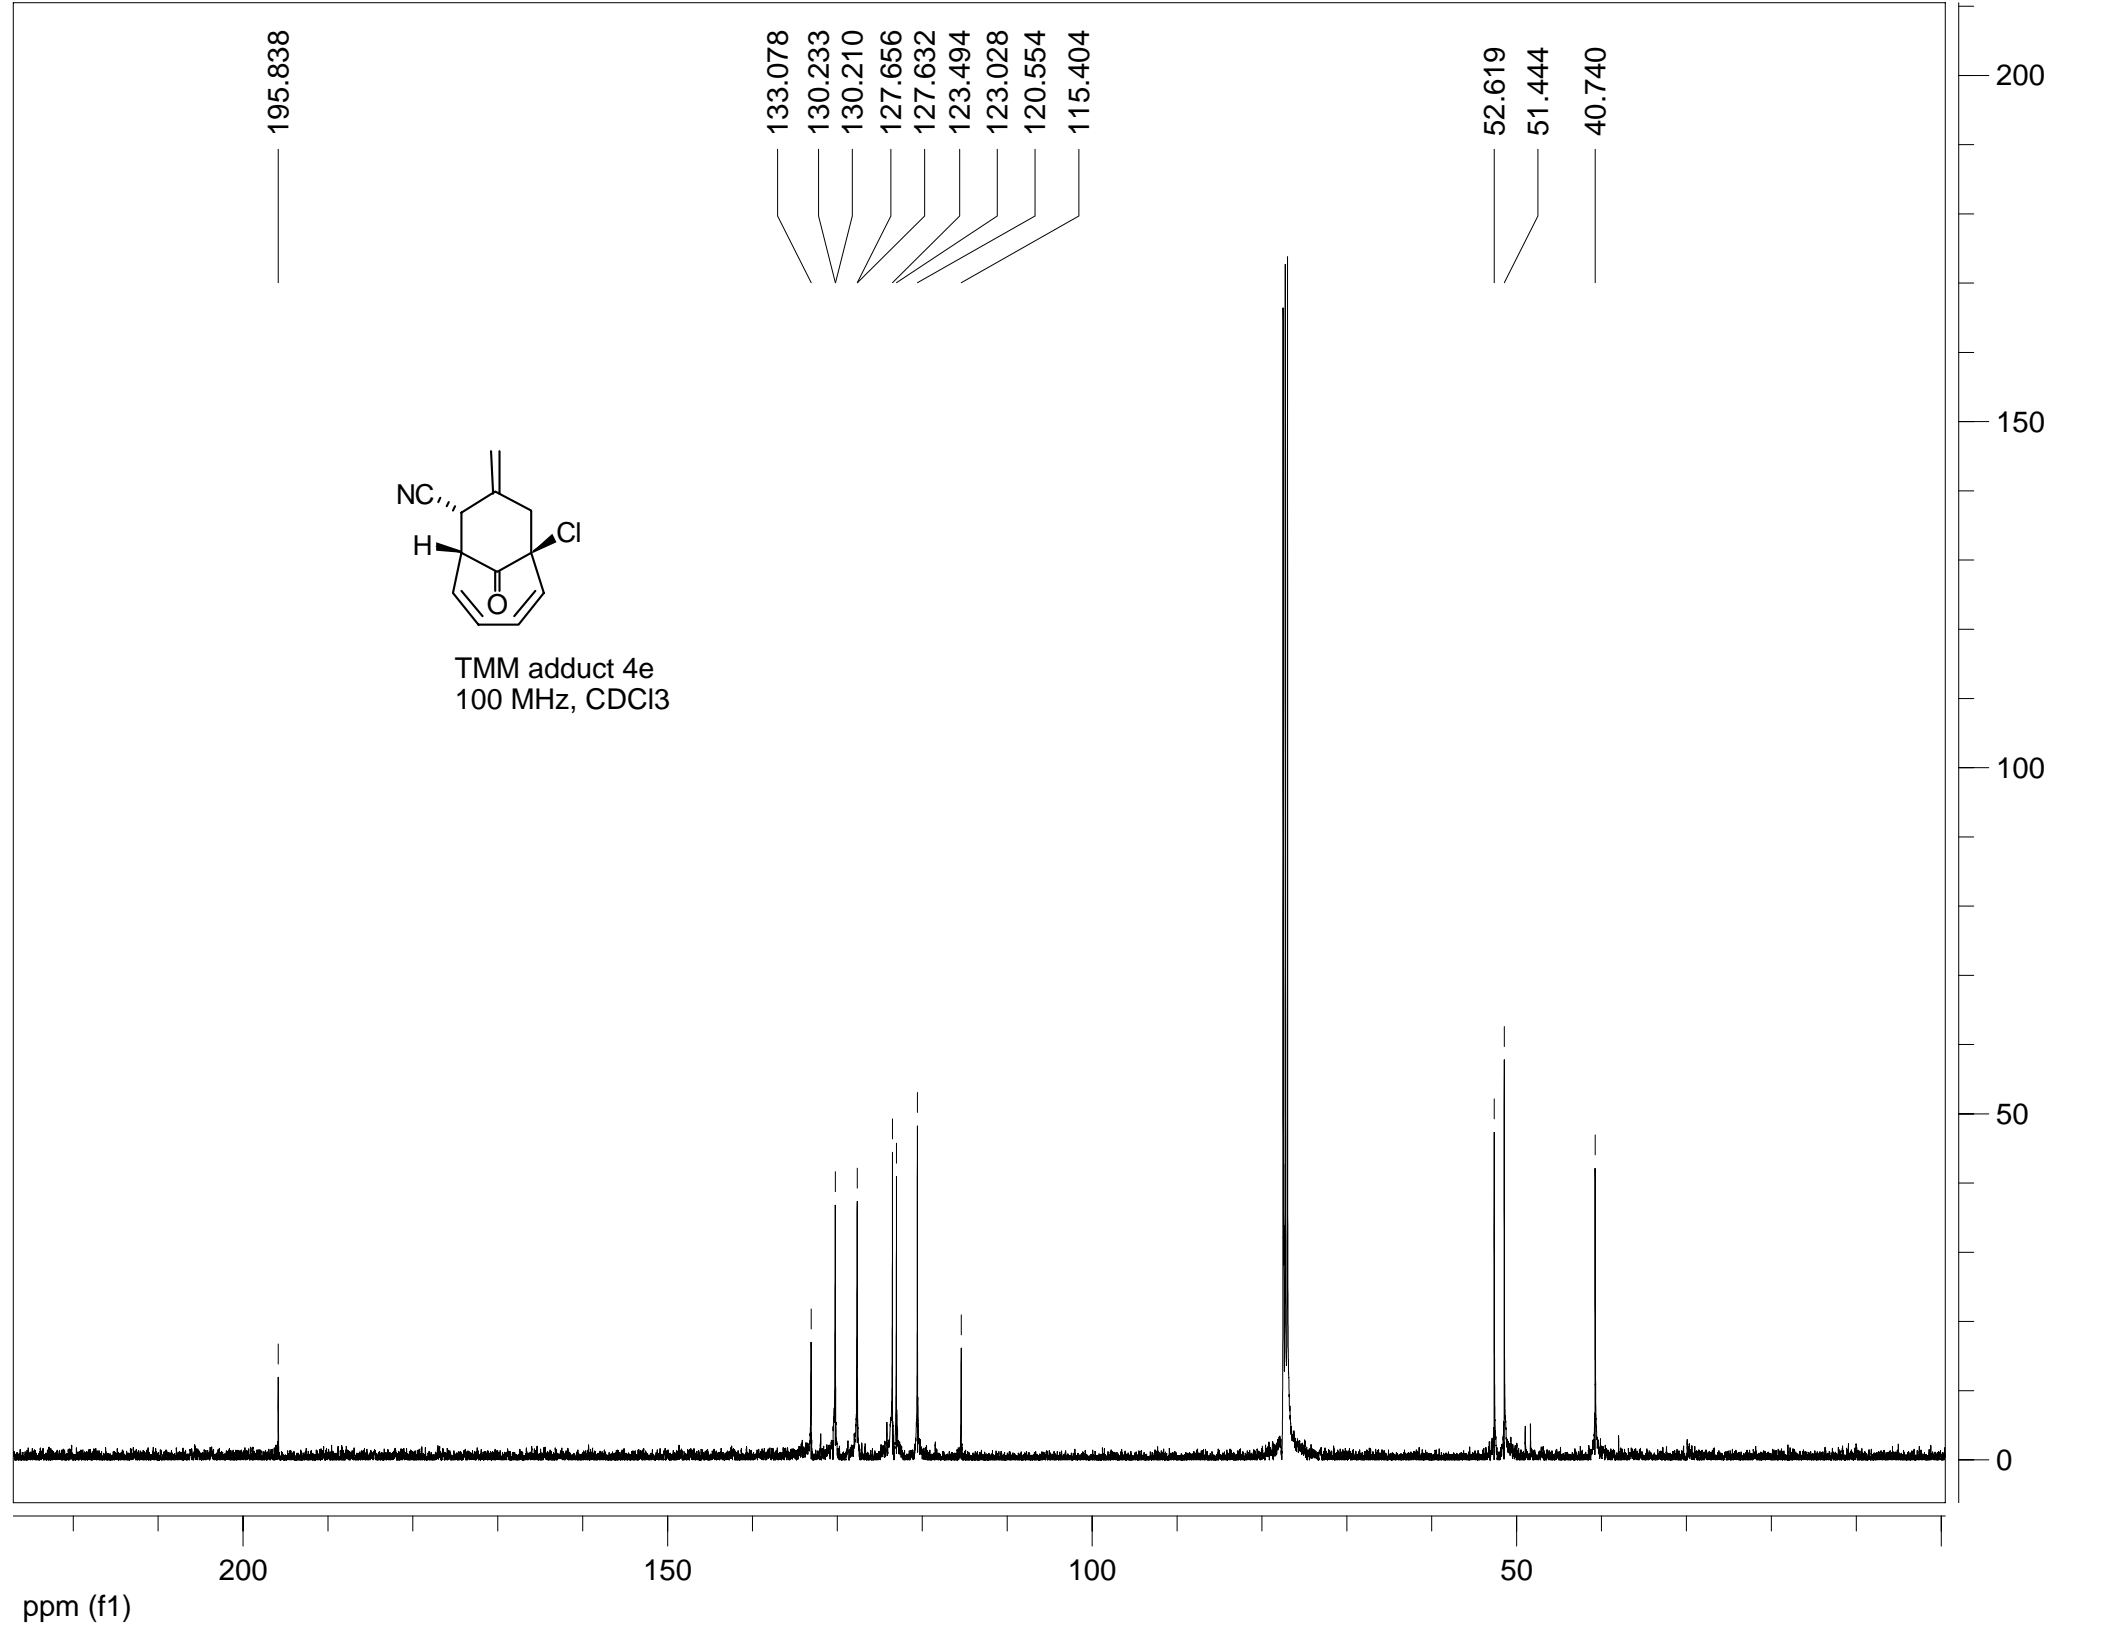

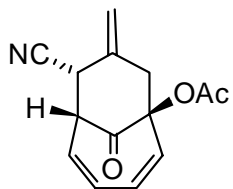

TMM adduct 4f  
400 MHz, CDCl<sub>3</sub>

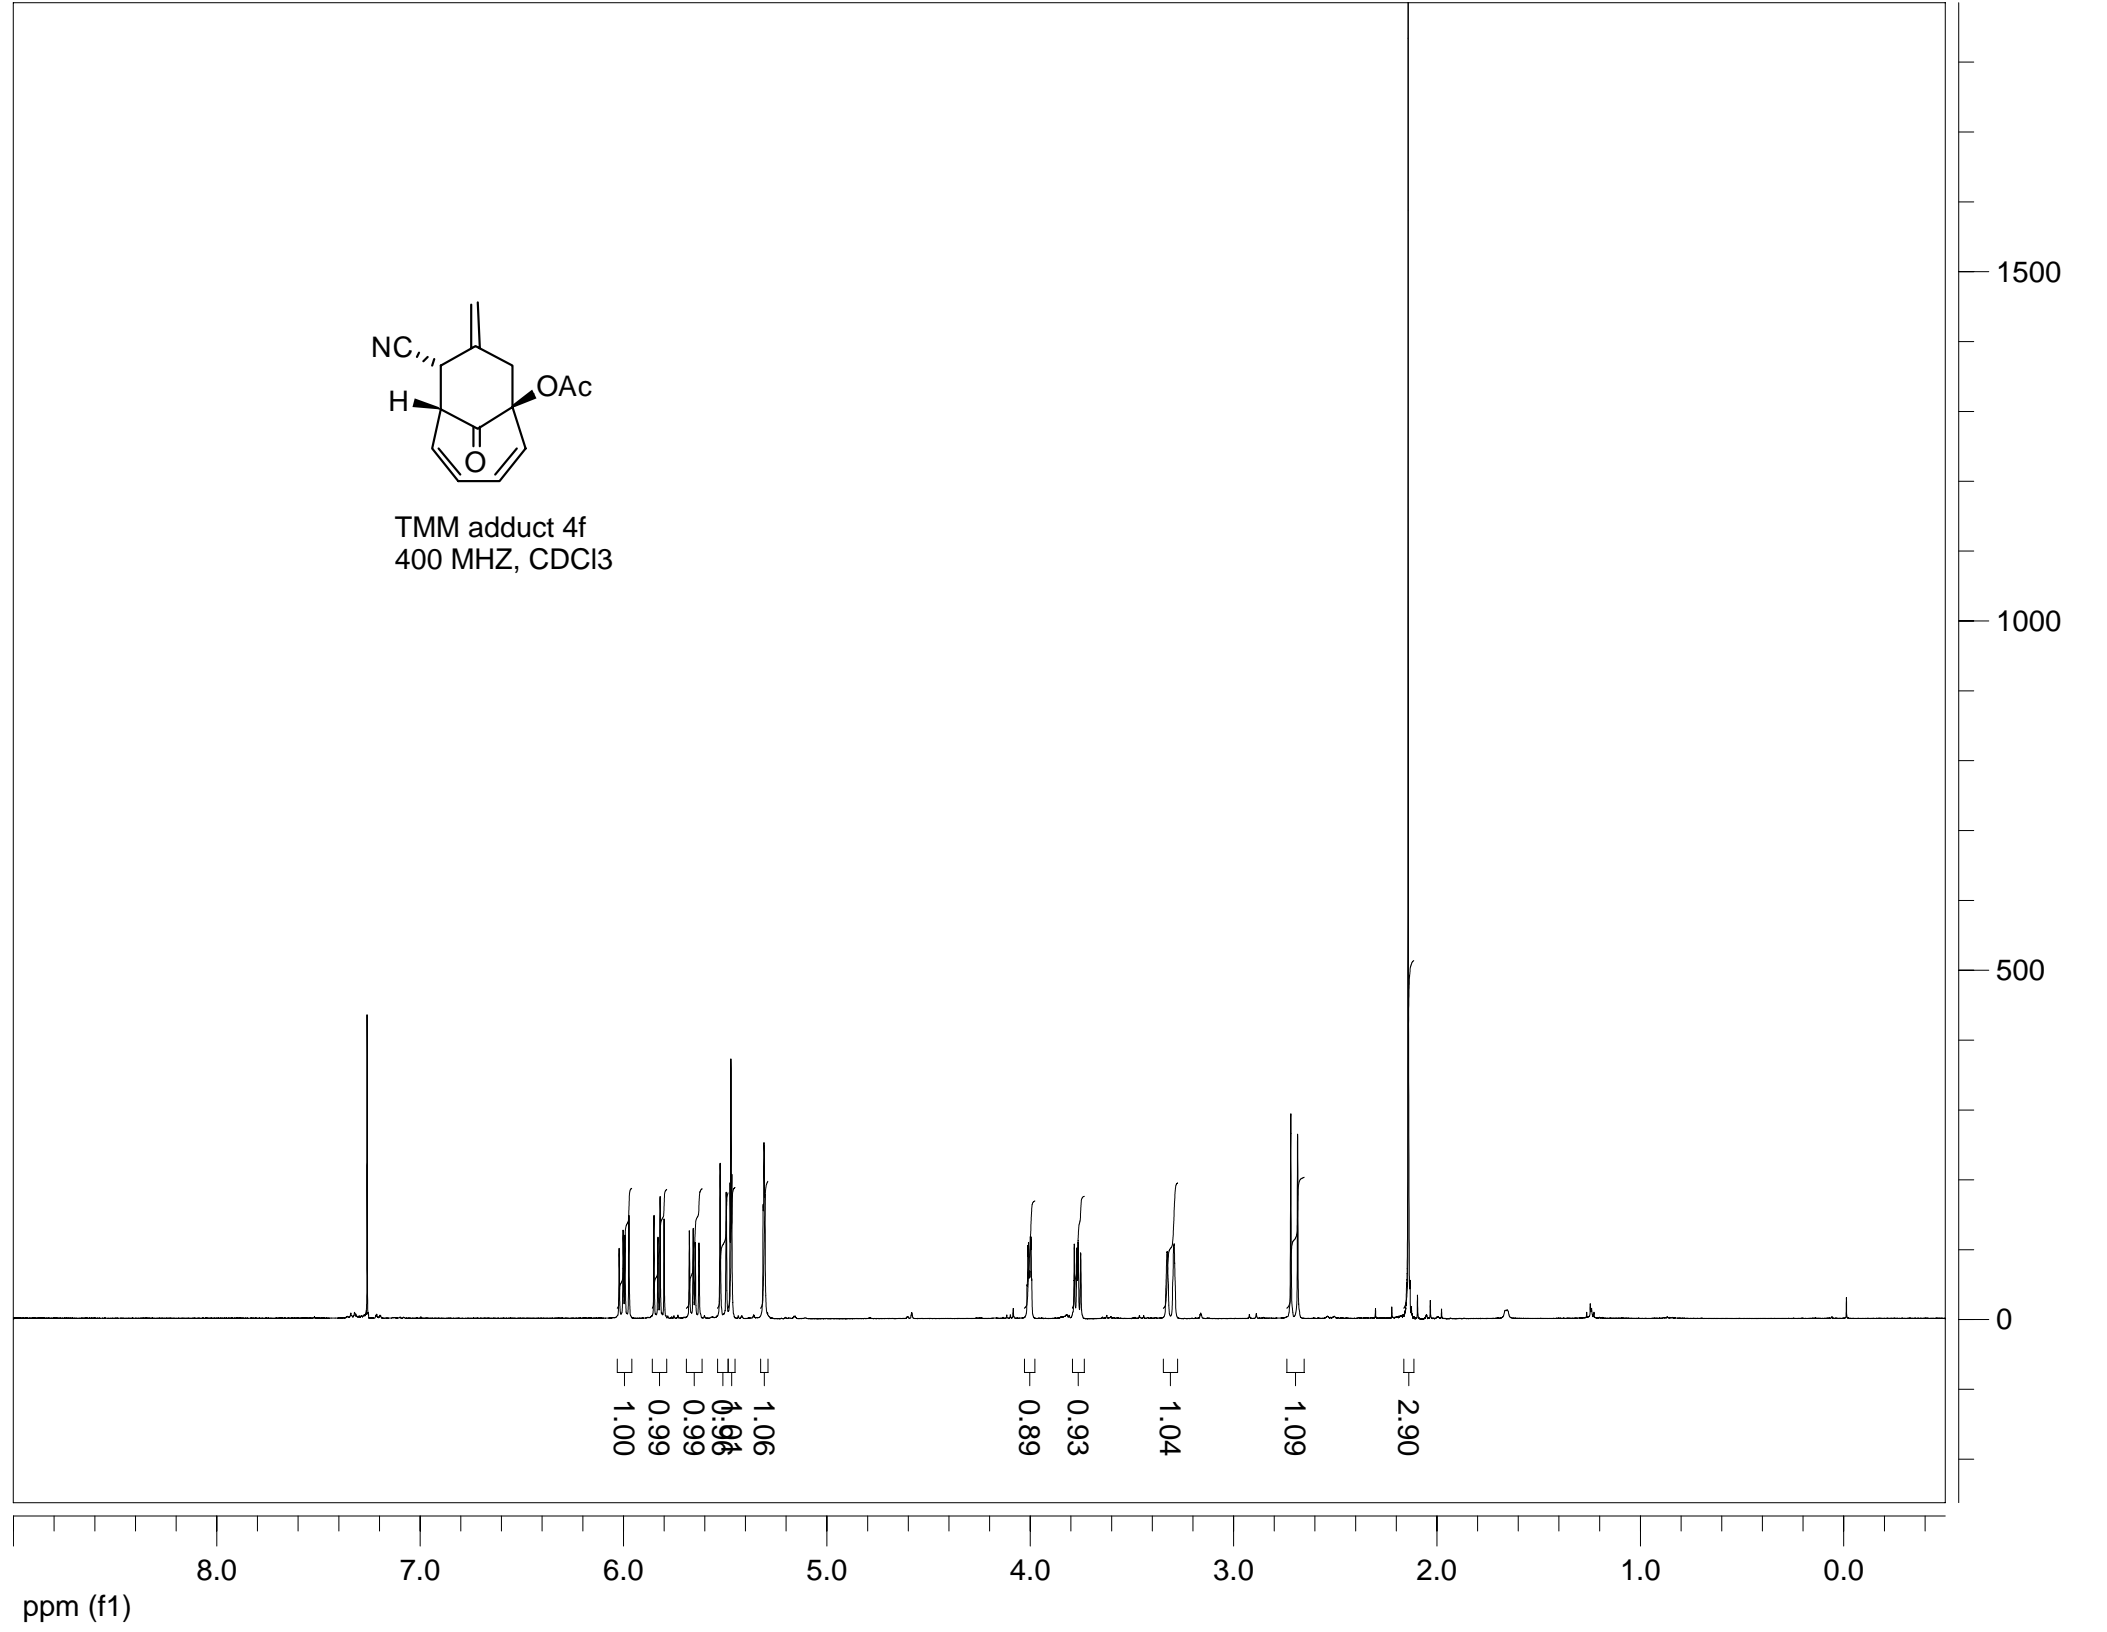

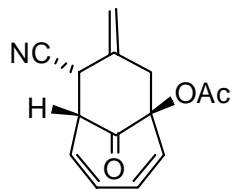

TMM adduct 4f  
100 MHz, CDCl<sub>3</sub>

197.103

169.863

133.199

128.468

127.557

123.029

122.625

122.615

119.658

115.899

86.592

52.292

44.940

39.477

21.537

15000

10000

5000

0

200

150

100

50

ppm (f1)

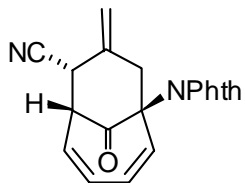

TMM adduct 4g  
400 MHz, CDCl<sub>3</sub>

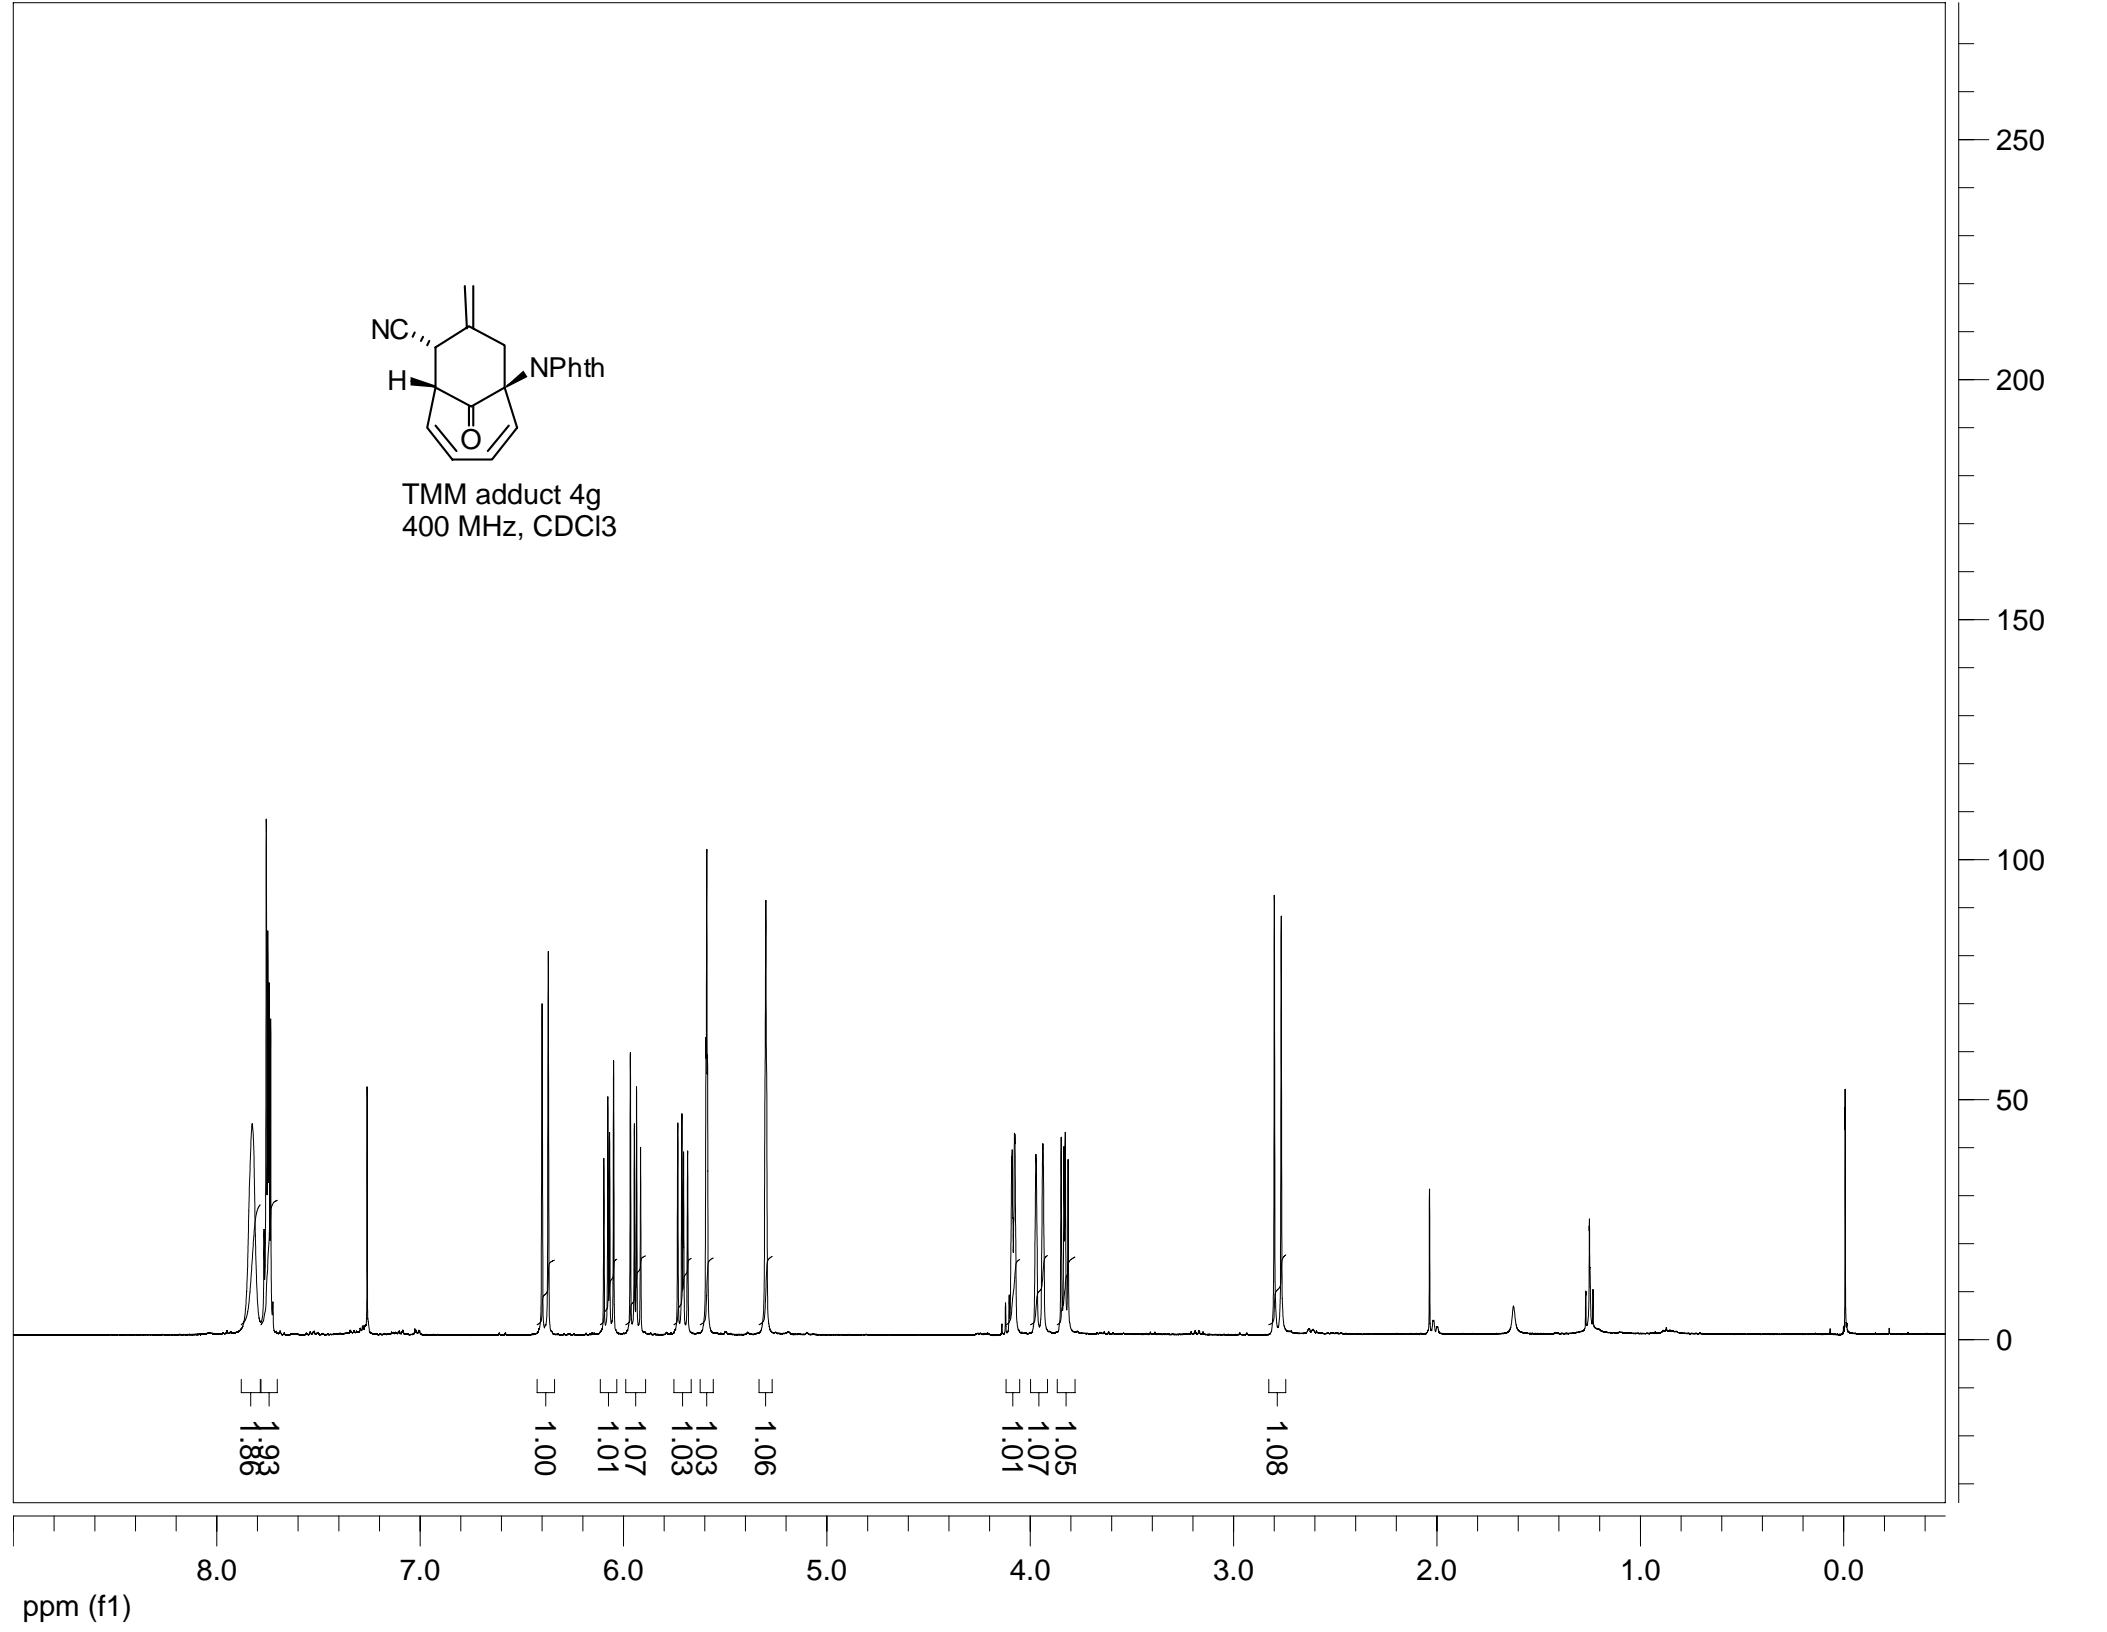

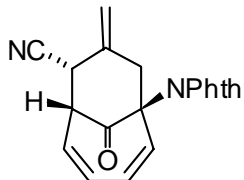

TMM adduct 4g  
100 MHz, CDCl<sub>3</sub>

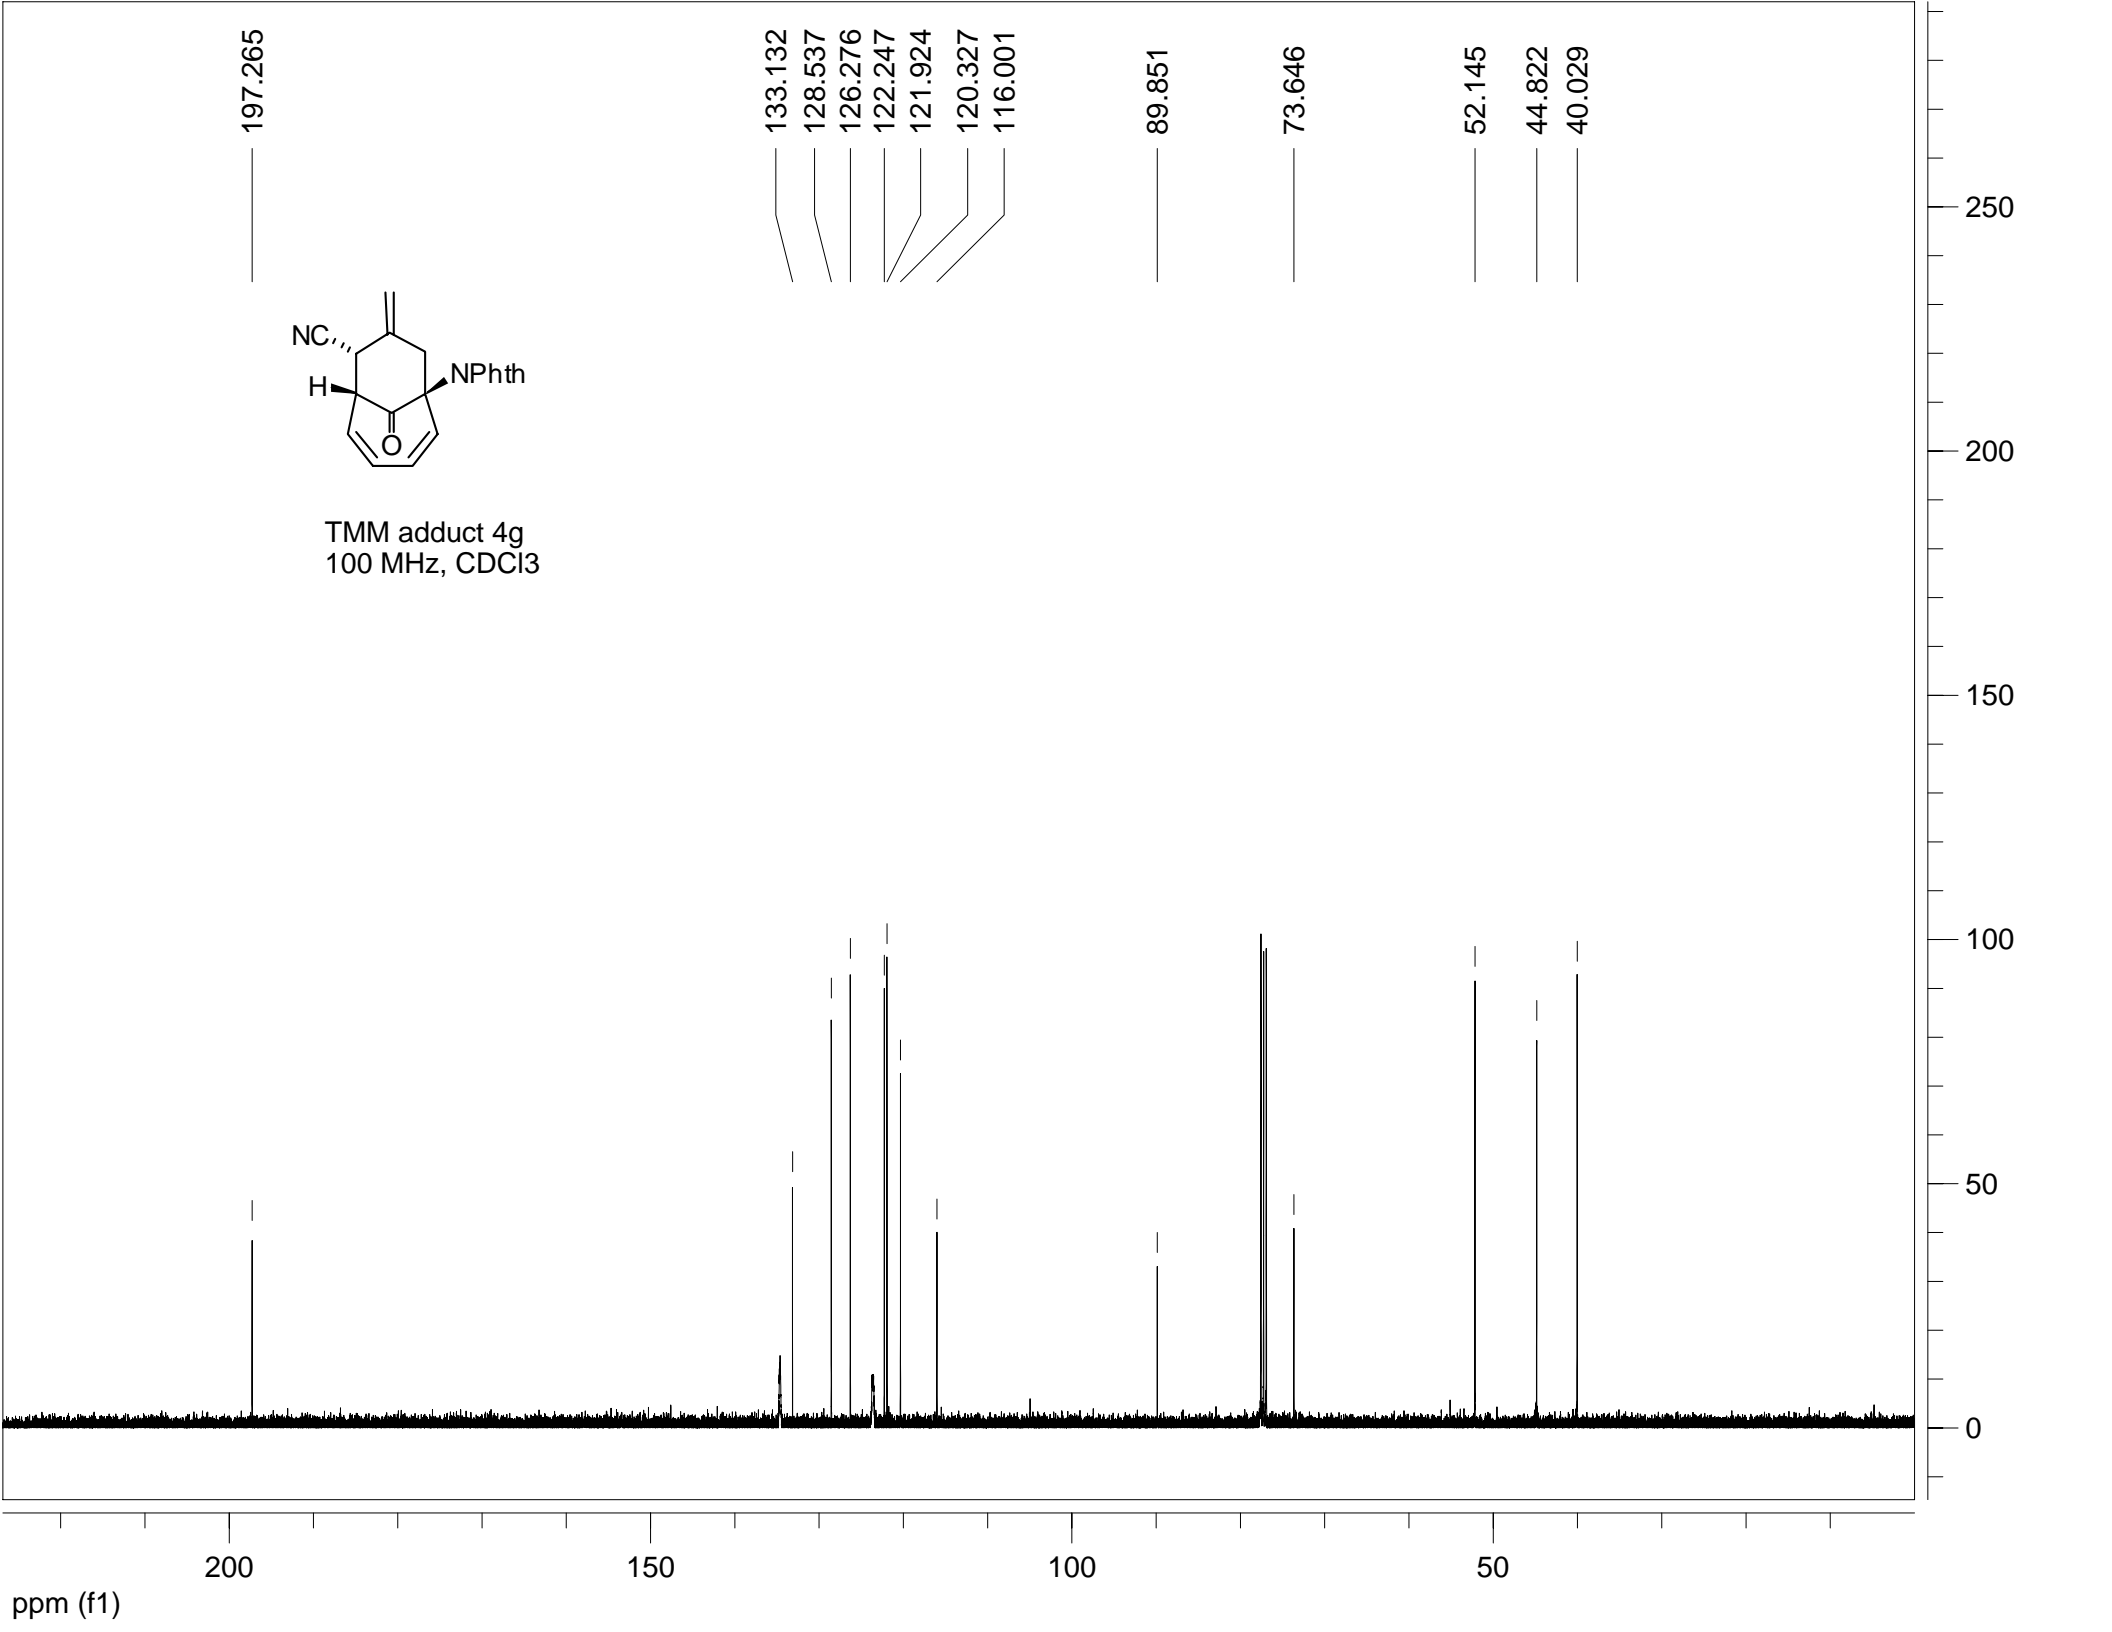

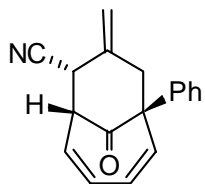

TMM adduct 4h  
400 MHz, CDCl<sub>3</sub>

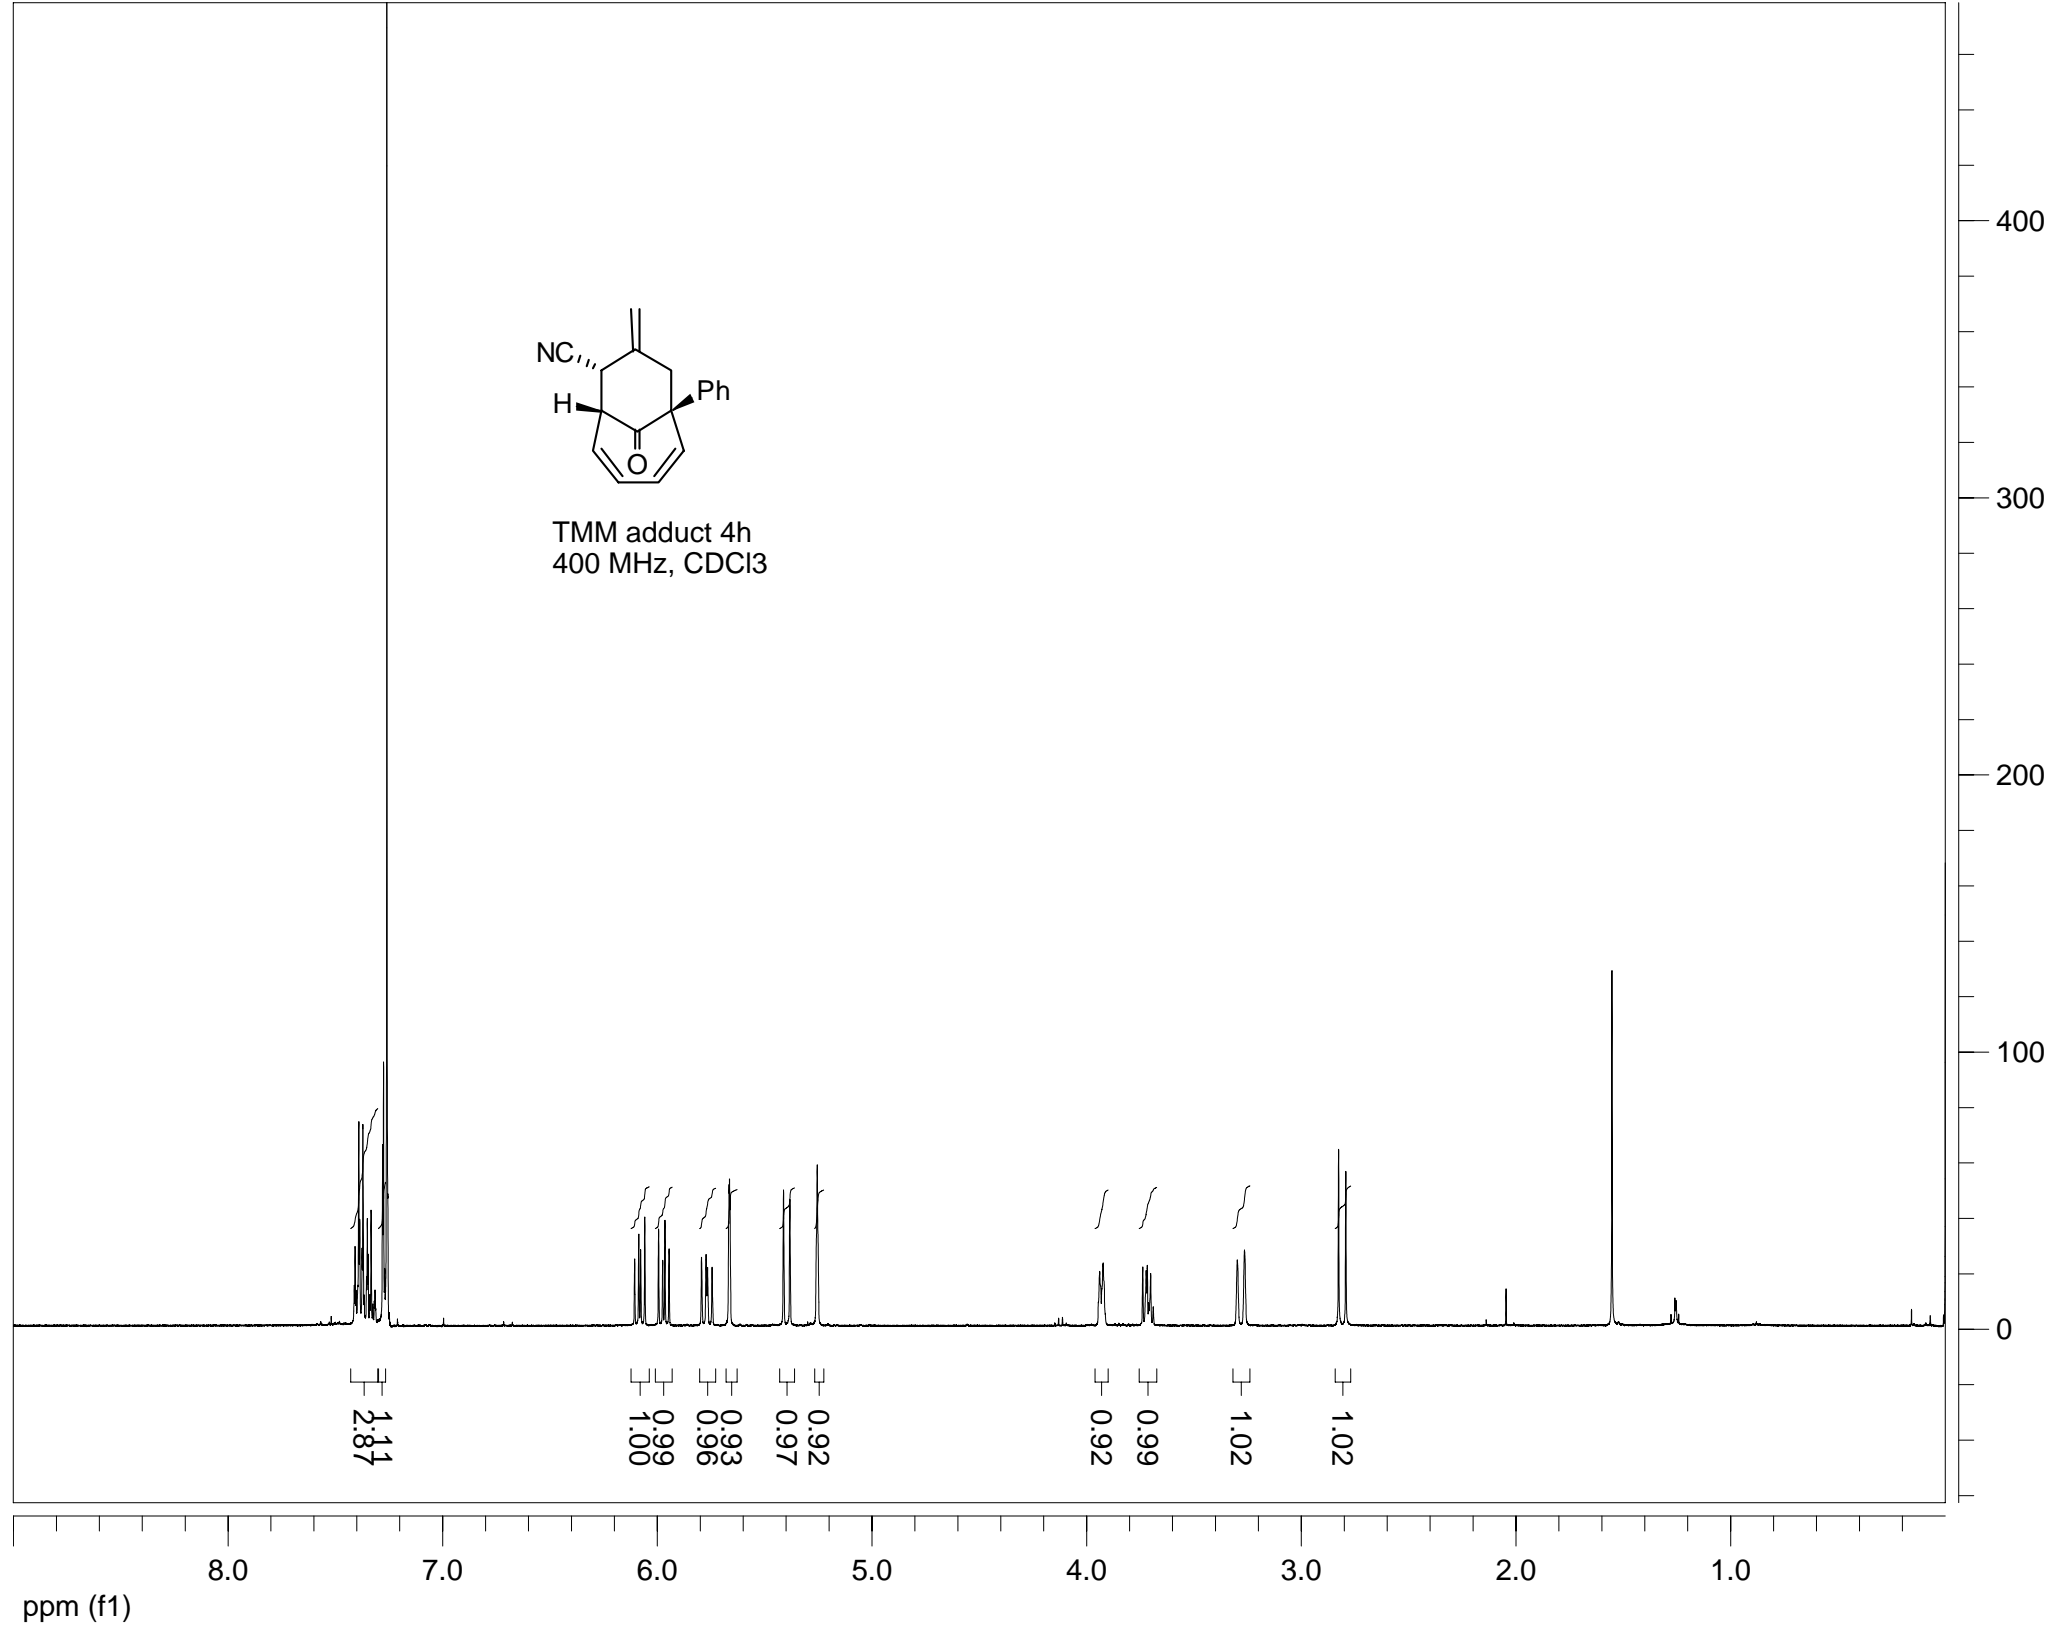



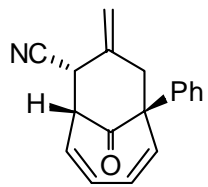

TMM adduct 4h  
100 MHz, CDCl<sub>3</sub>

140.211  
134.918  
134.678  
132.654  
128.726  
128.574  
128.510  
128.479  
128.385  
128.134  
128.094  
127.885  
127.863  
127.816  
124.583  
123.232  
123.210  
119.192  
116.213

63.694

53.523

44.310

41.363

5000

4000

3000

2000

1000

0

200

150

100

50

ppm (f1)

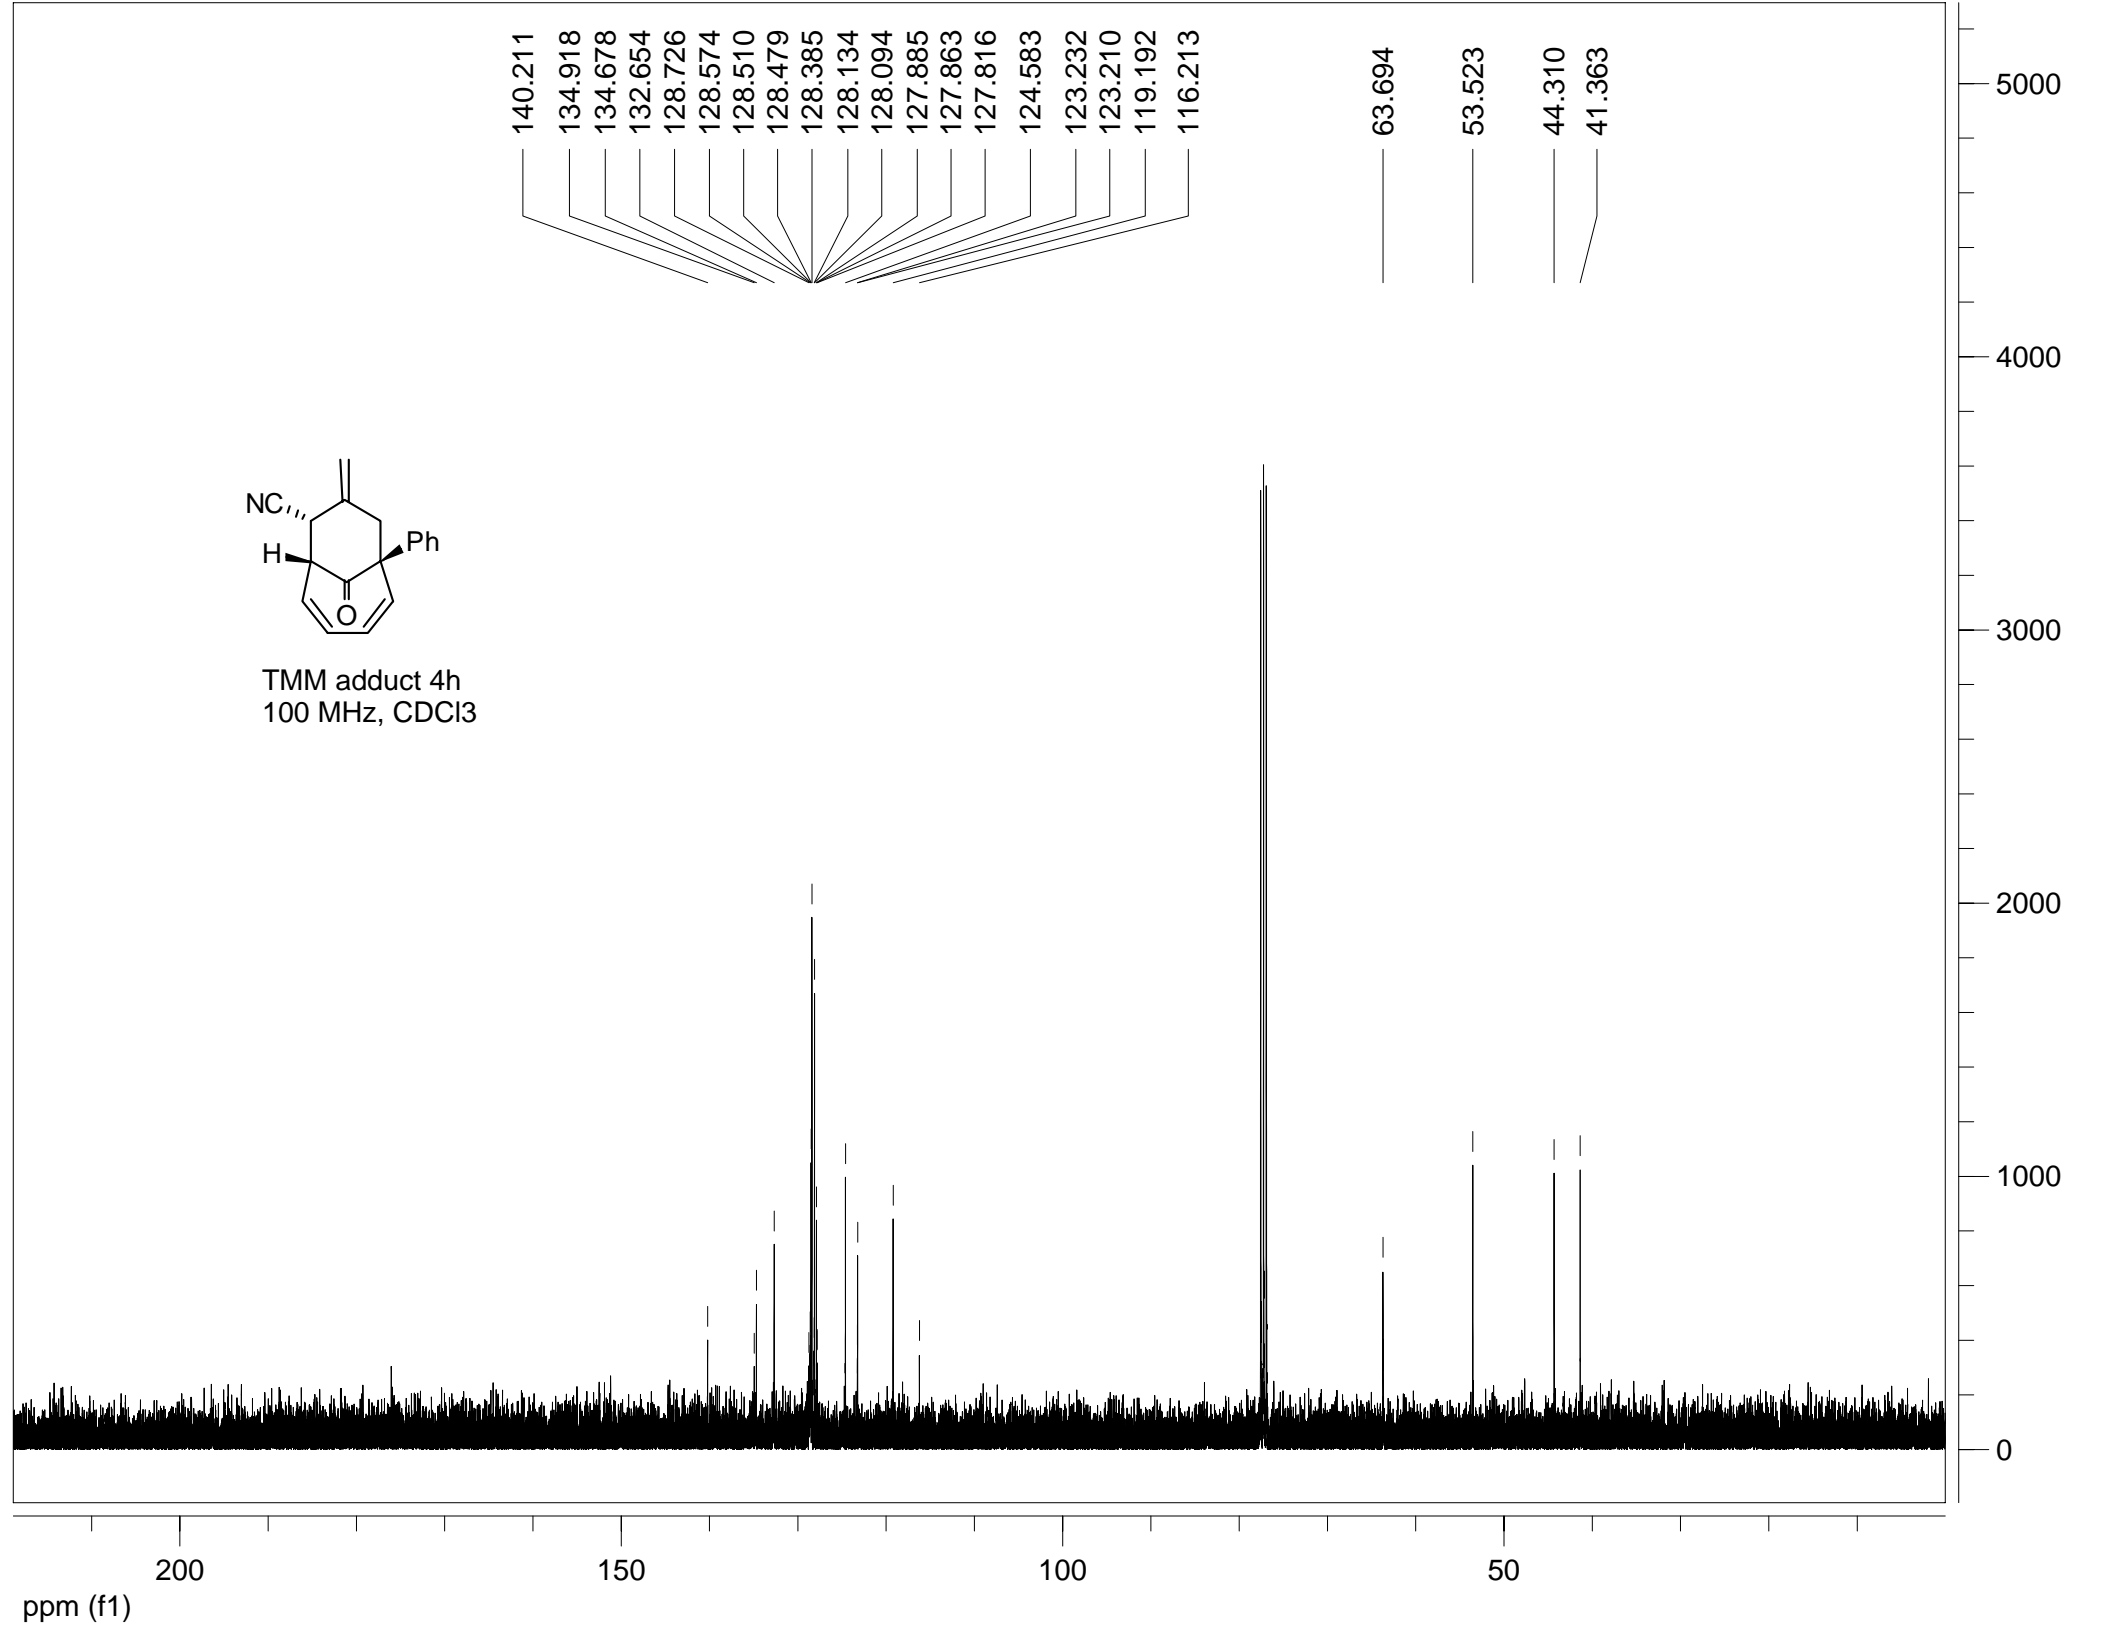

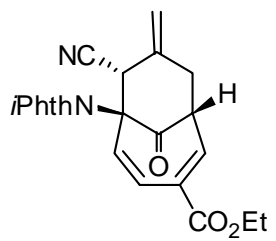

TMM adduct 4i  
400 MHz, CDCl<sub>3</sub>

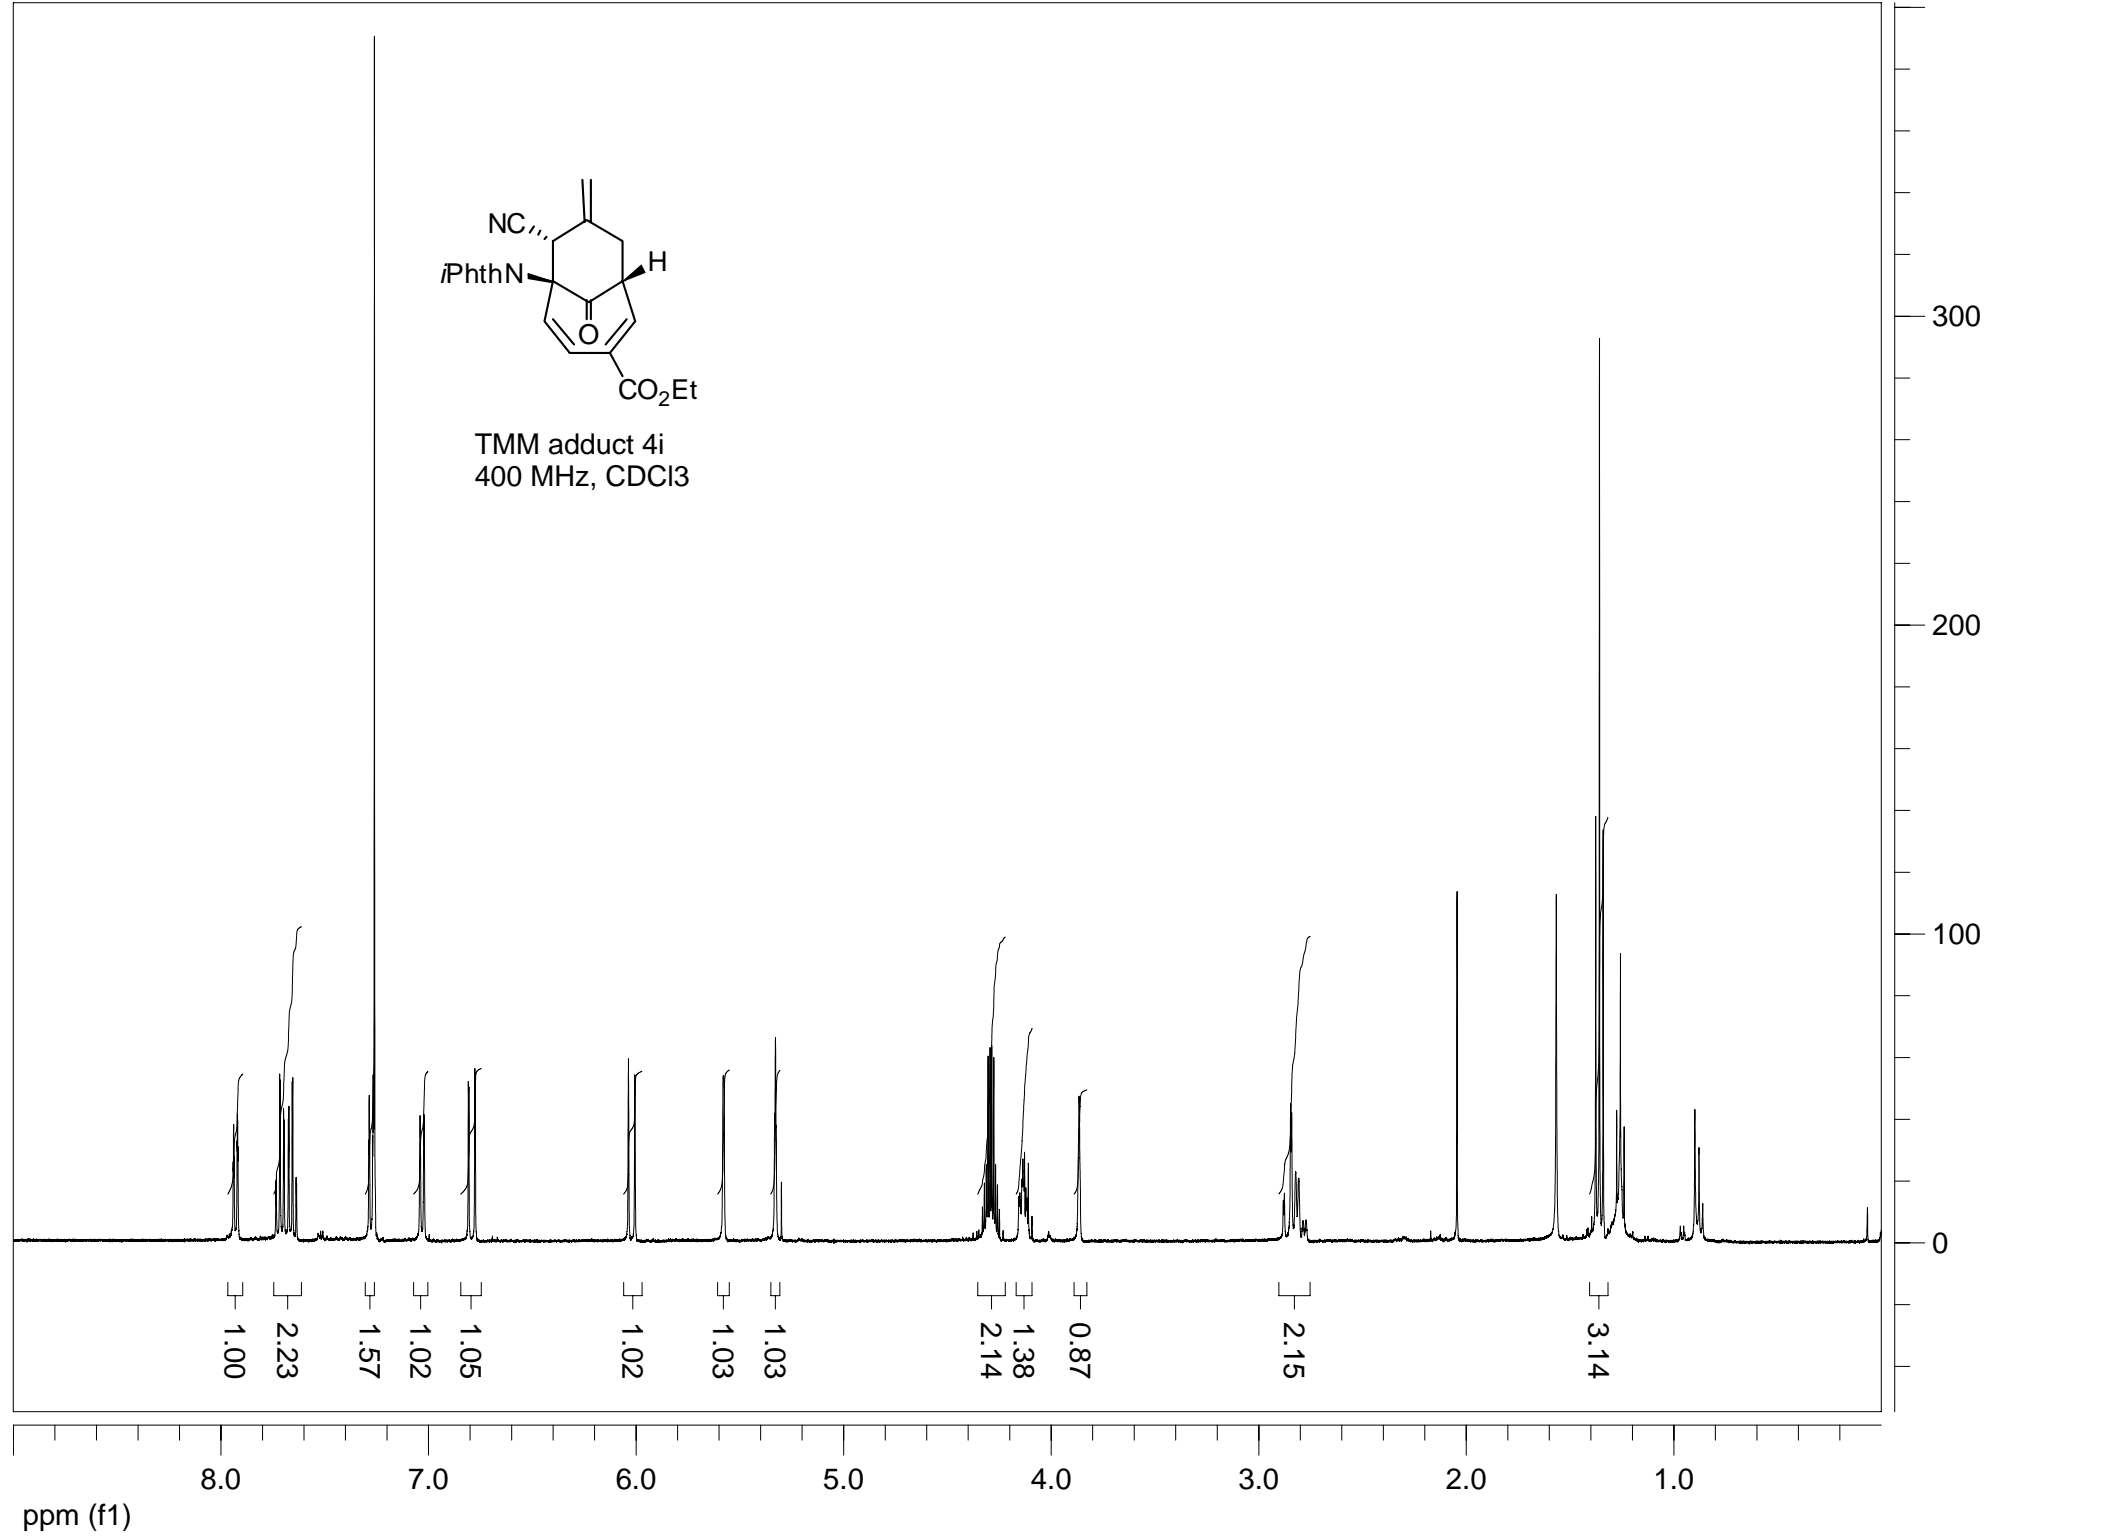

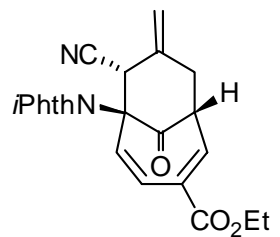

TMM adduct 4i  
100 MHz, CDCl<sub>3</sub>

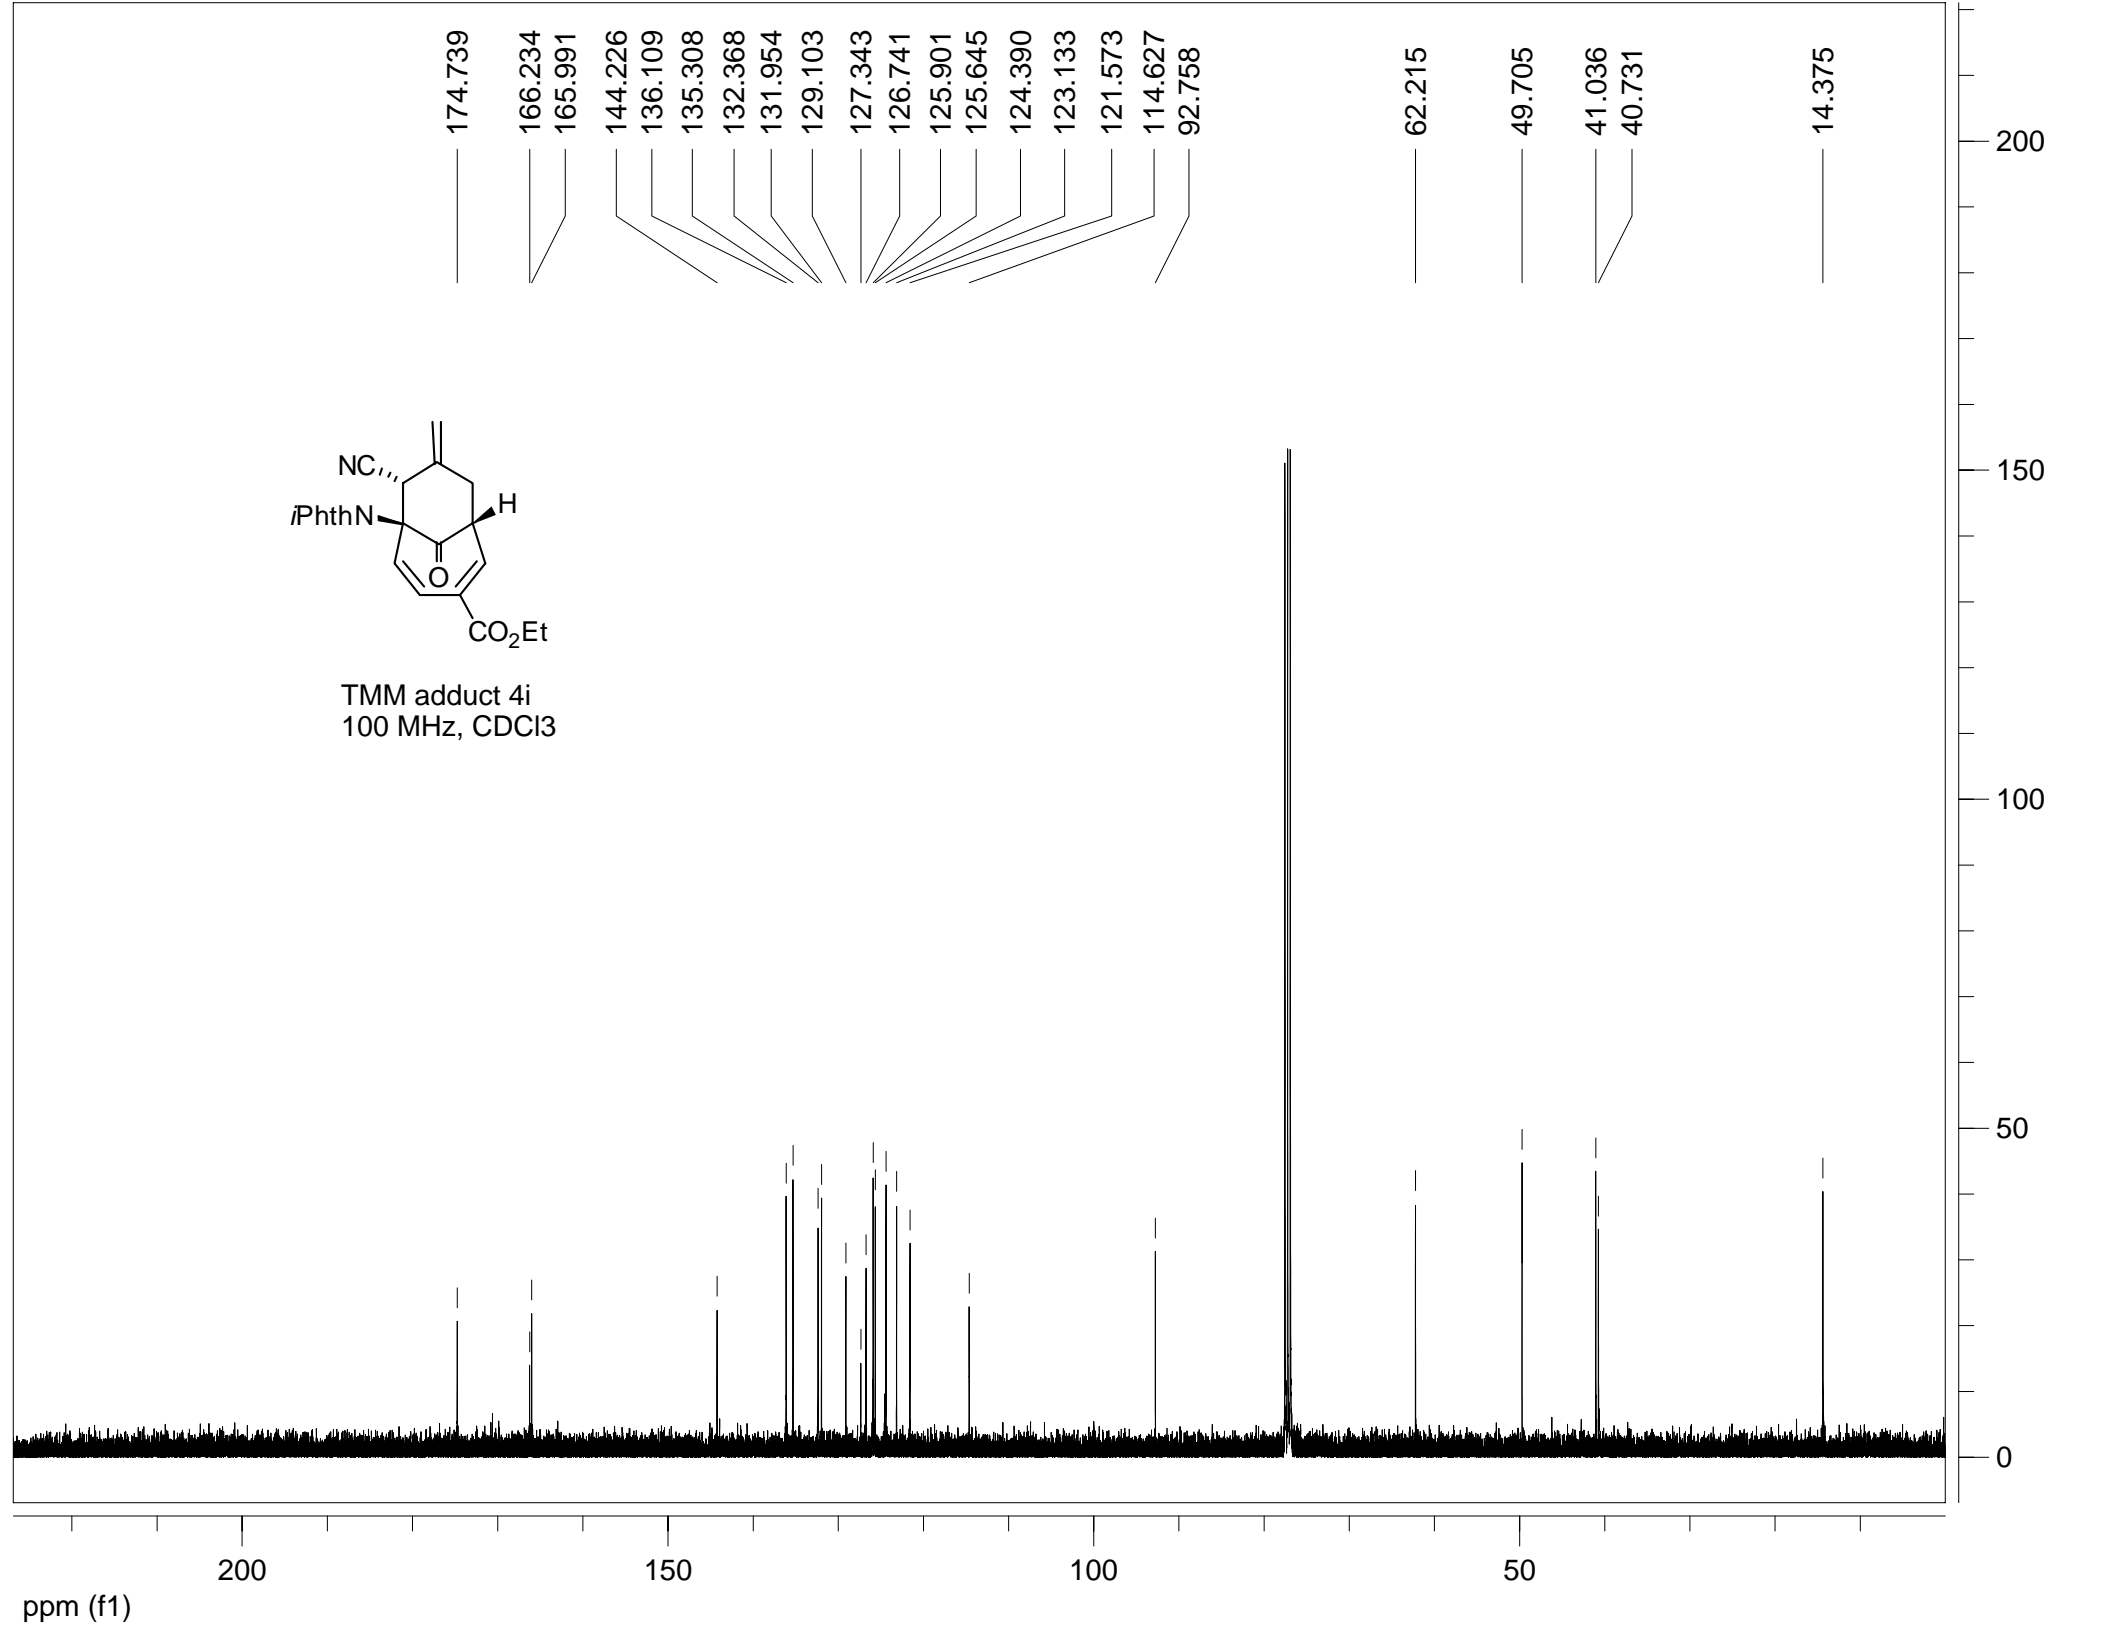

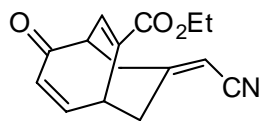

Cope product 5a  
400 MHz, CDCl<sub>3</sub>

1.28

1.00

0.94

0.96

2.89

1.06

1.14

1.14

1.01

1.09

2.99

7.0

6.0

5.0

4.0

3.0

2.0

1.0

0.0

ppm (f1)

400

300

200

100

0

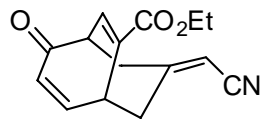

Cope product 5a  
100 MHz, CDCl<sub>3</sub>

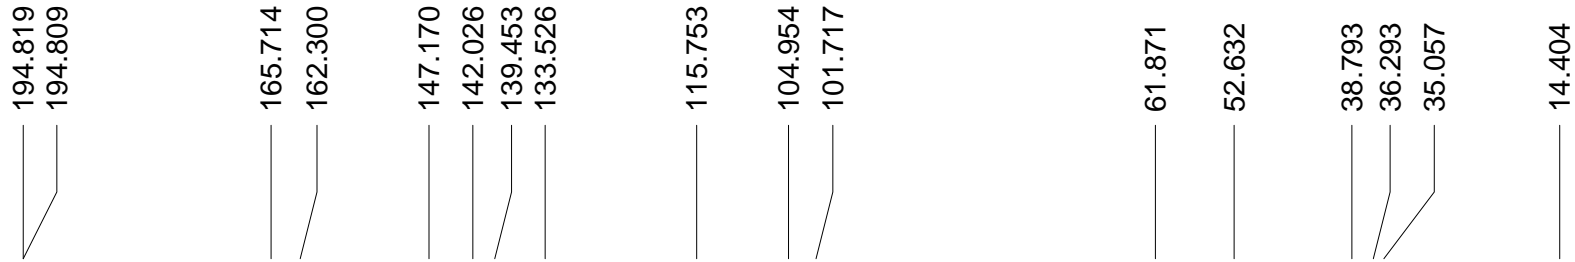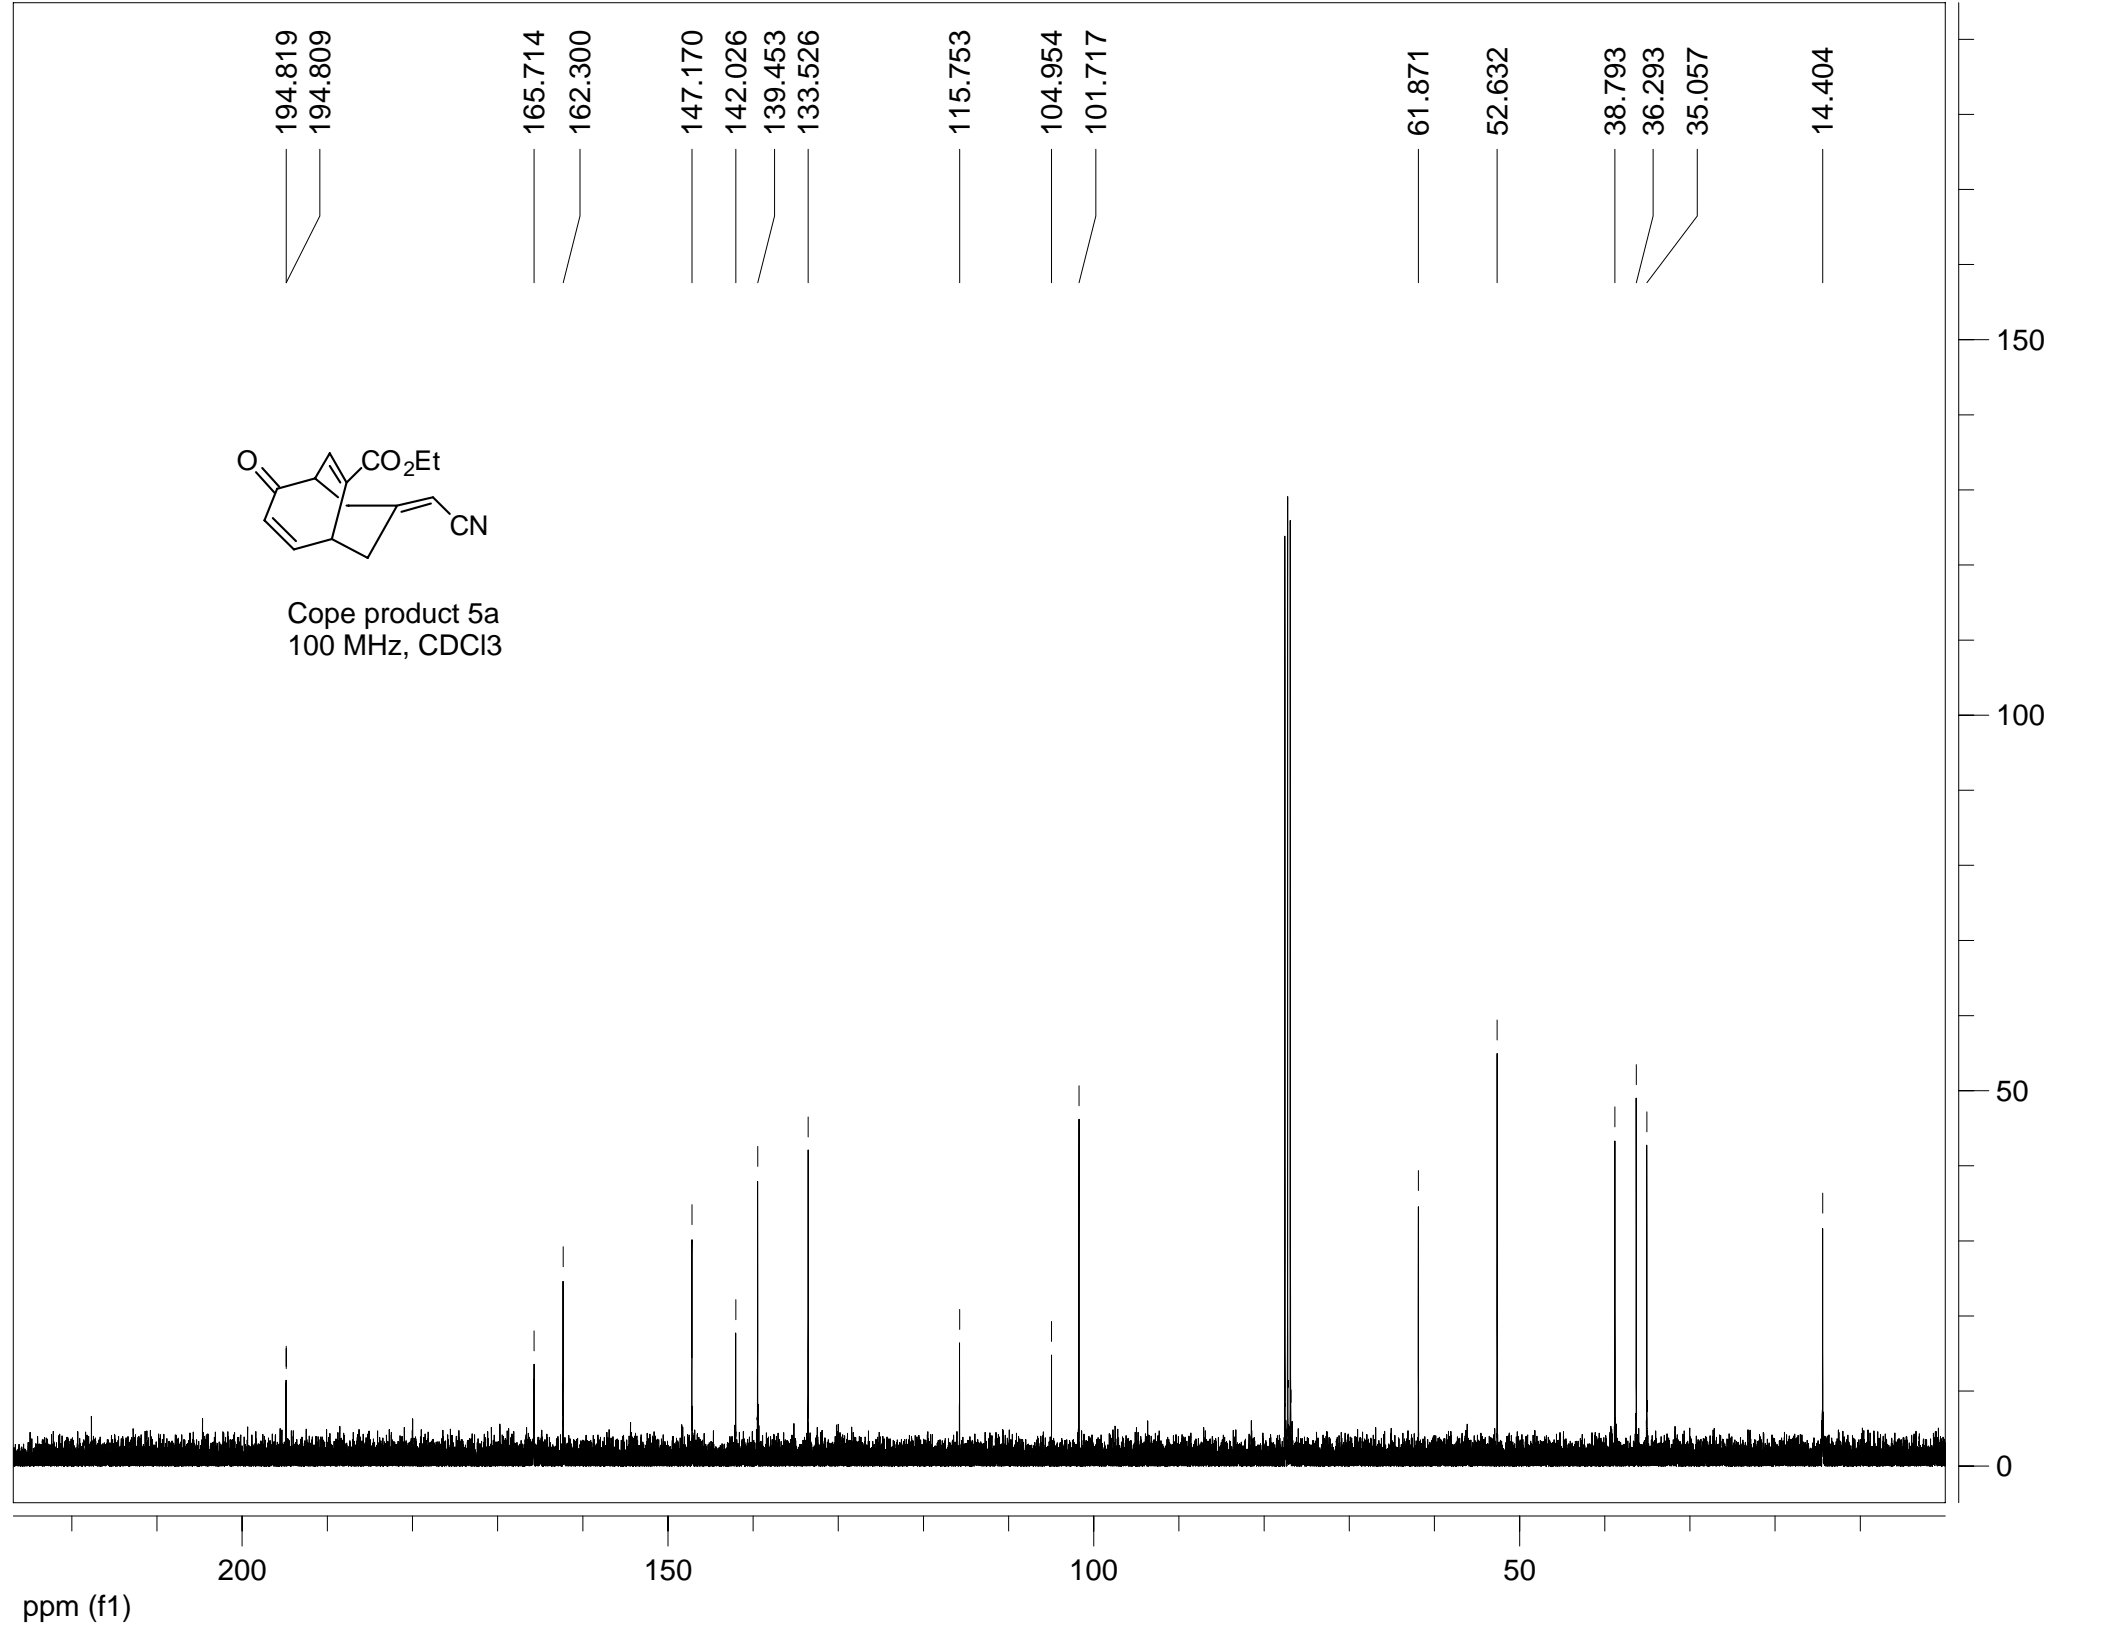

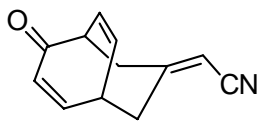

Cope product 5d  
400 MHz, CDCl<sub>3</sub>

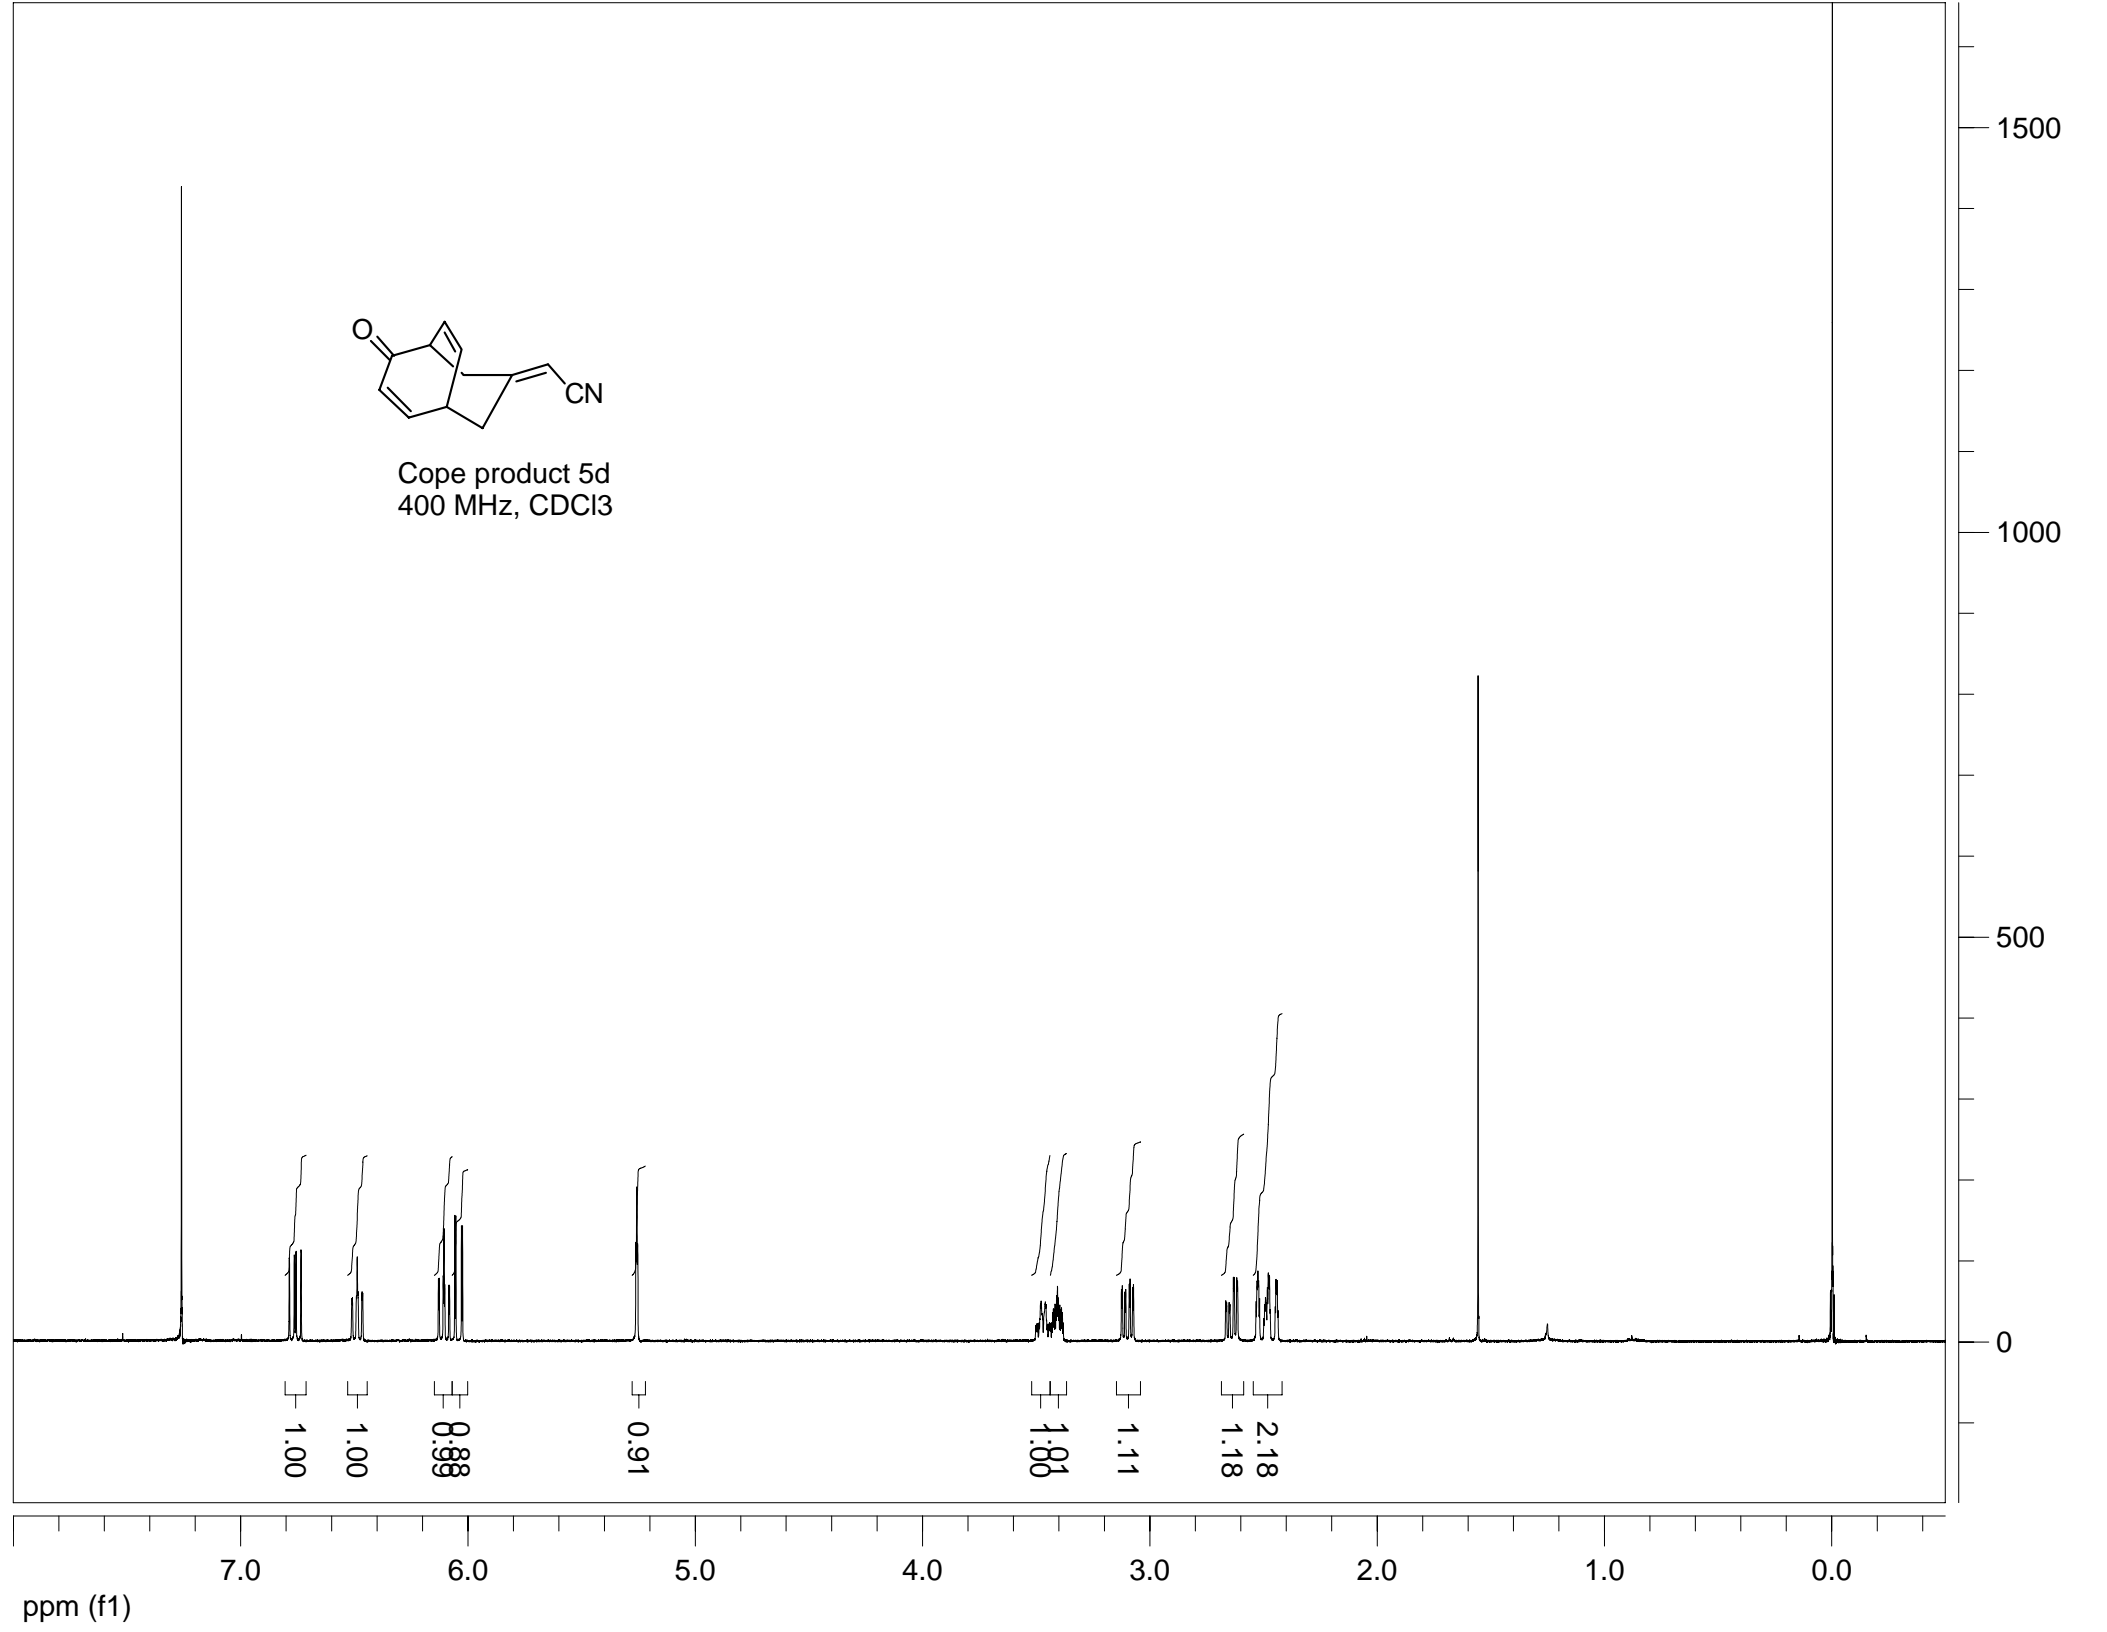

196.835  
163.697  
147.600  
138.778  
133.435  
130.116  
116.096  
101.038

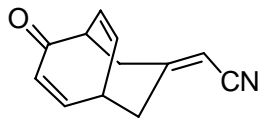

Cope product, 5a  
100 MHz, CDCl<sub>3</sub>

53.059  
39.491  
37.761  
35.434

150  
100  
50  
0

ppm (f1)

200

150

100

50

0

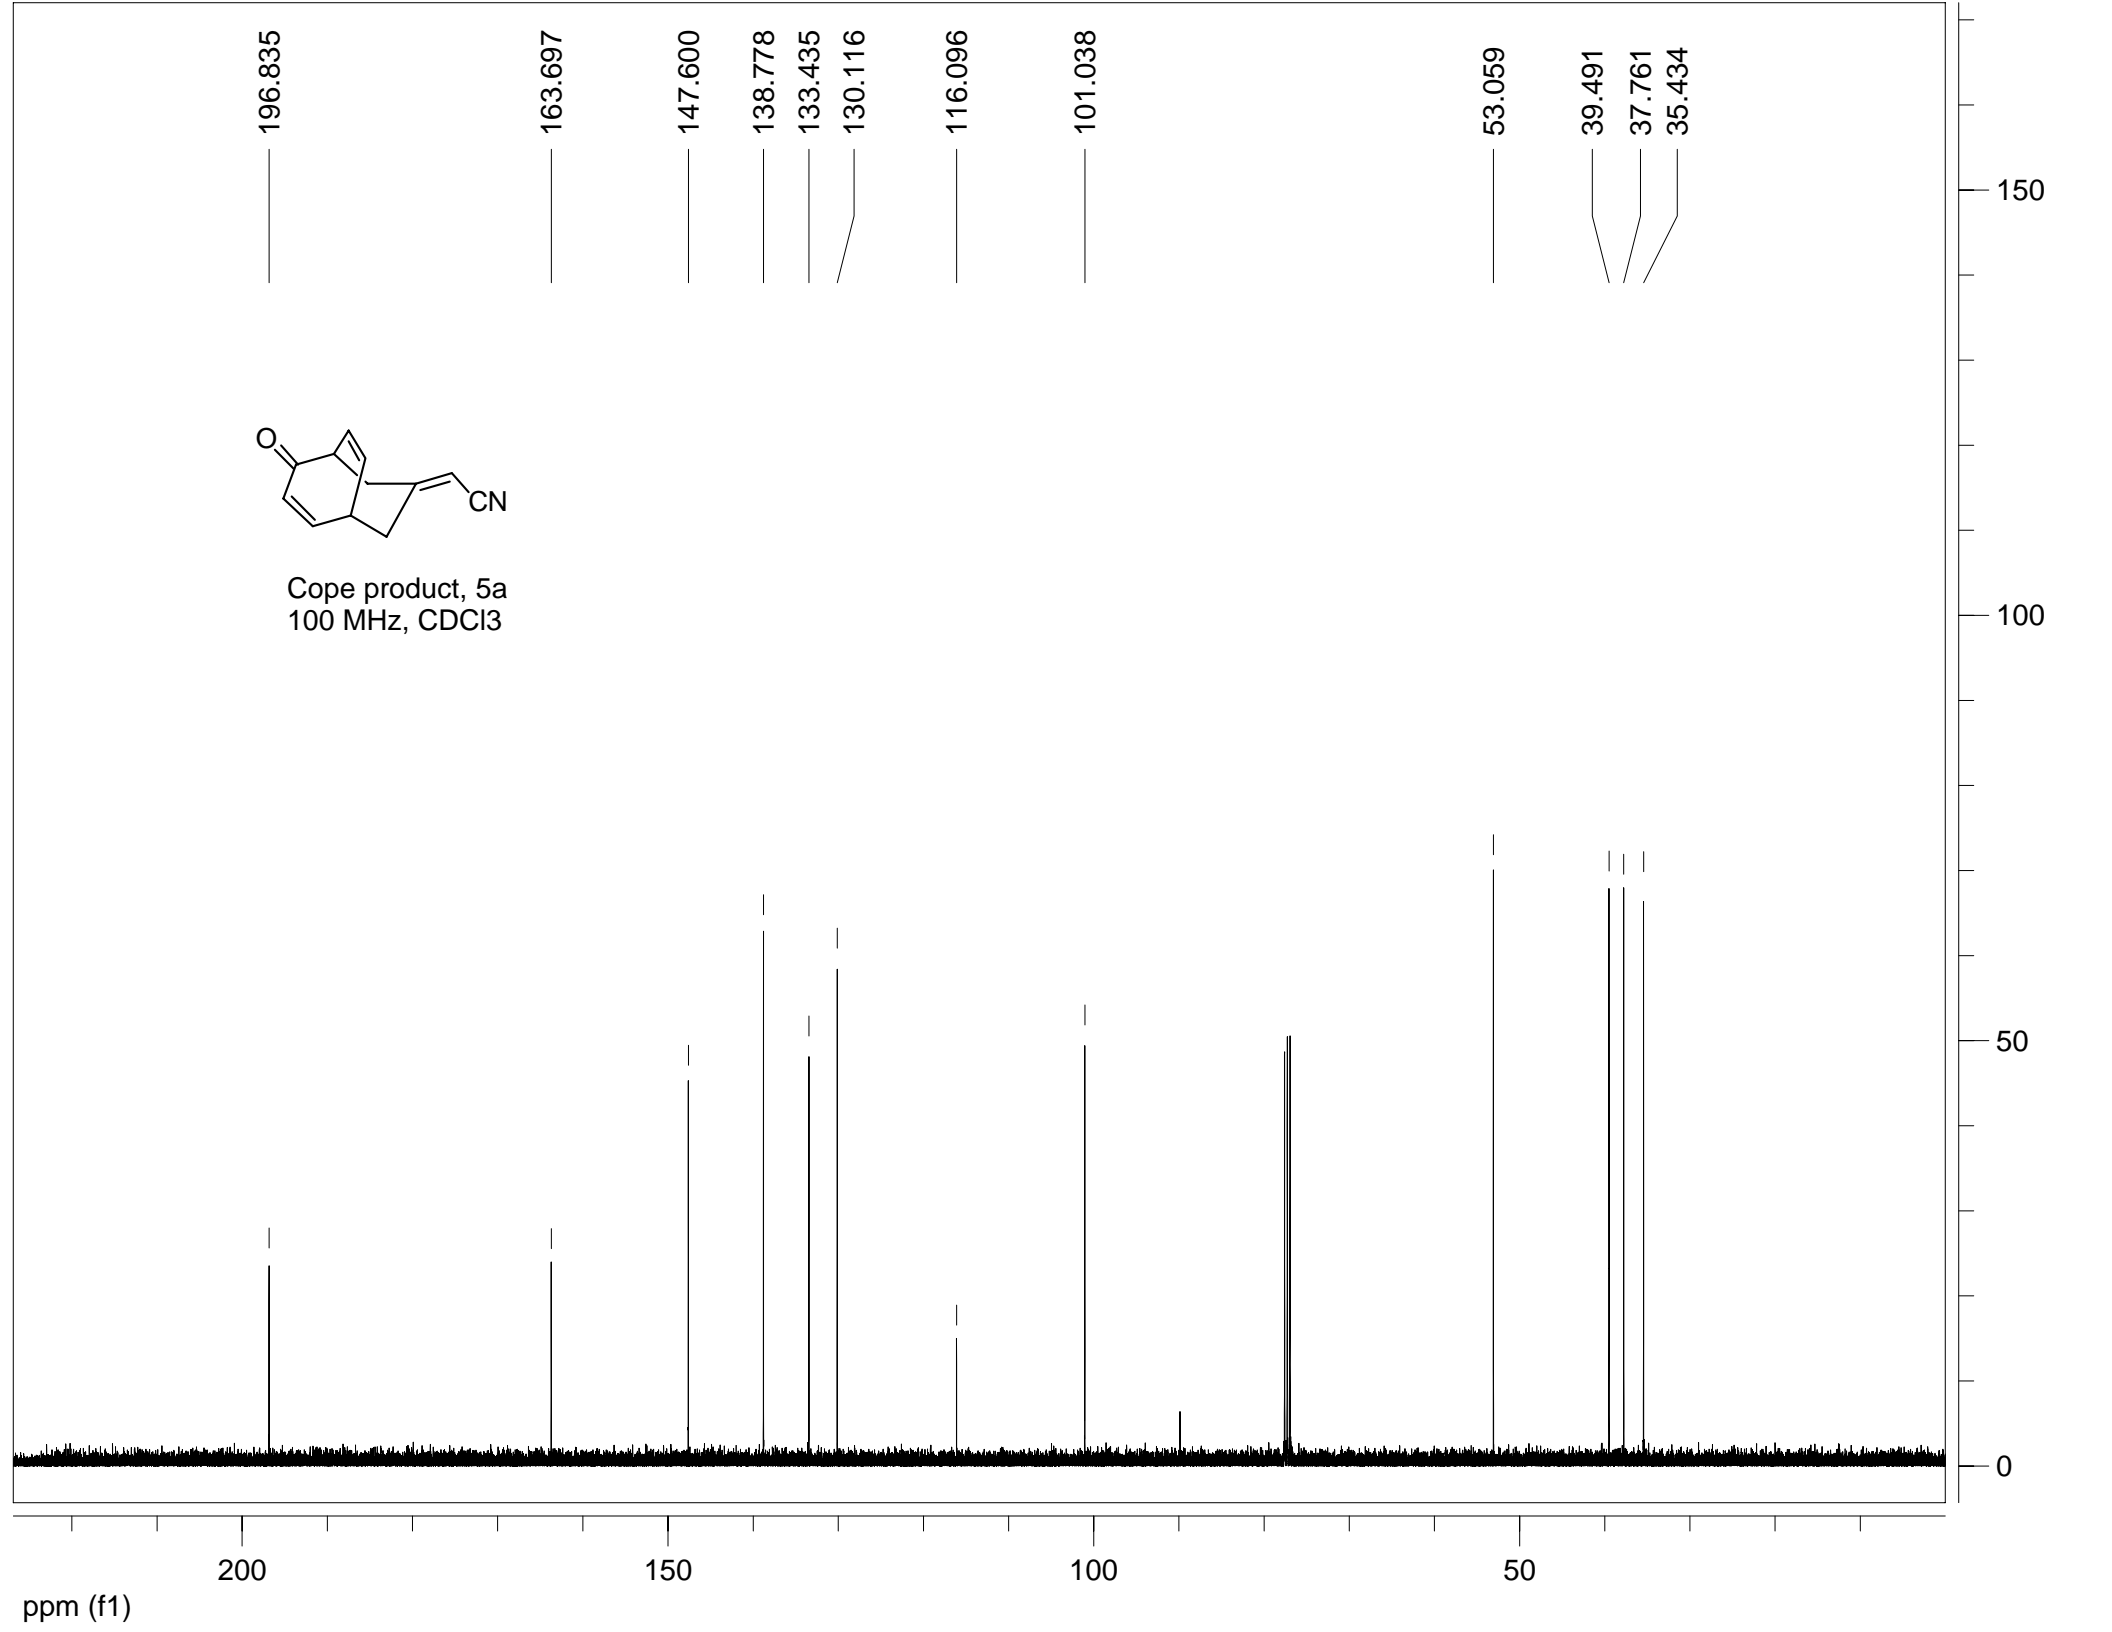

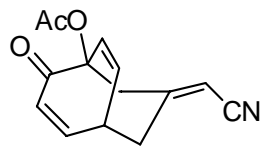

Cope product 5f  
400 MHz, CDCl<sub>3</sub>

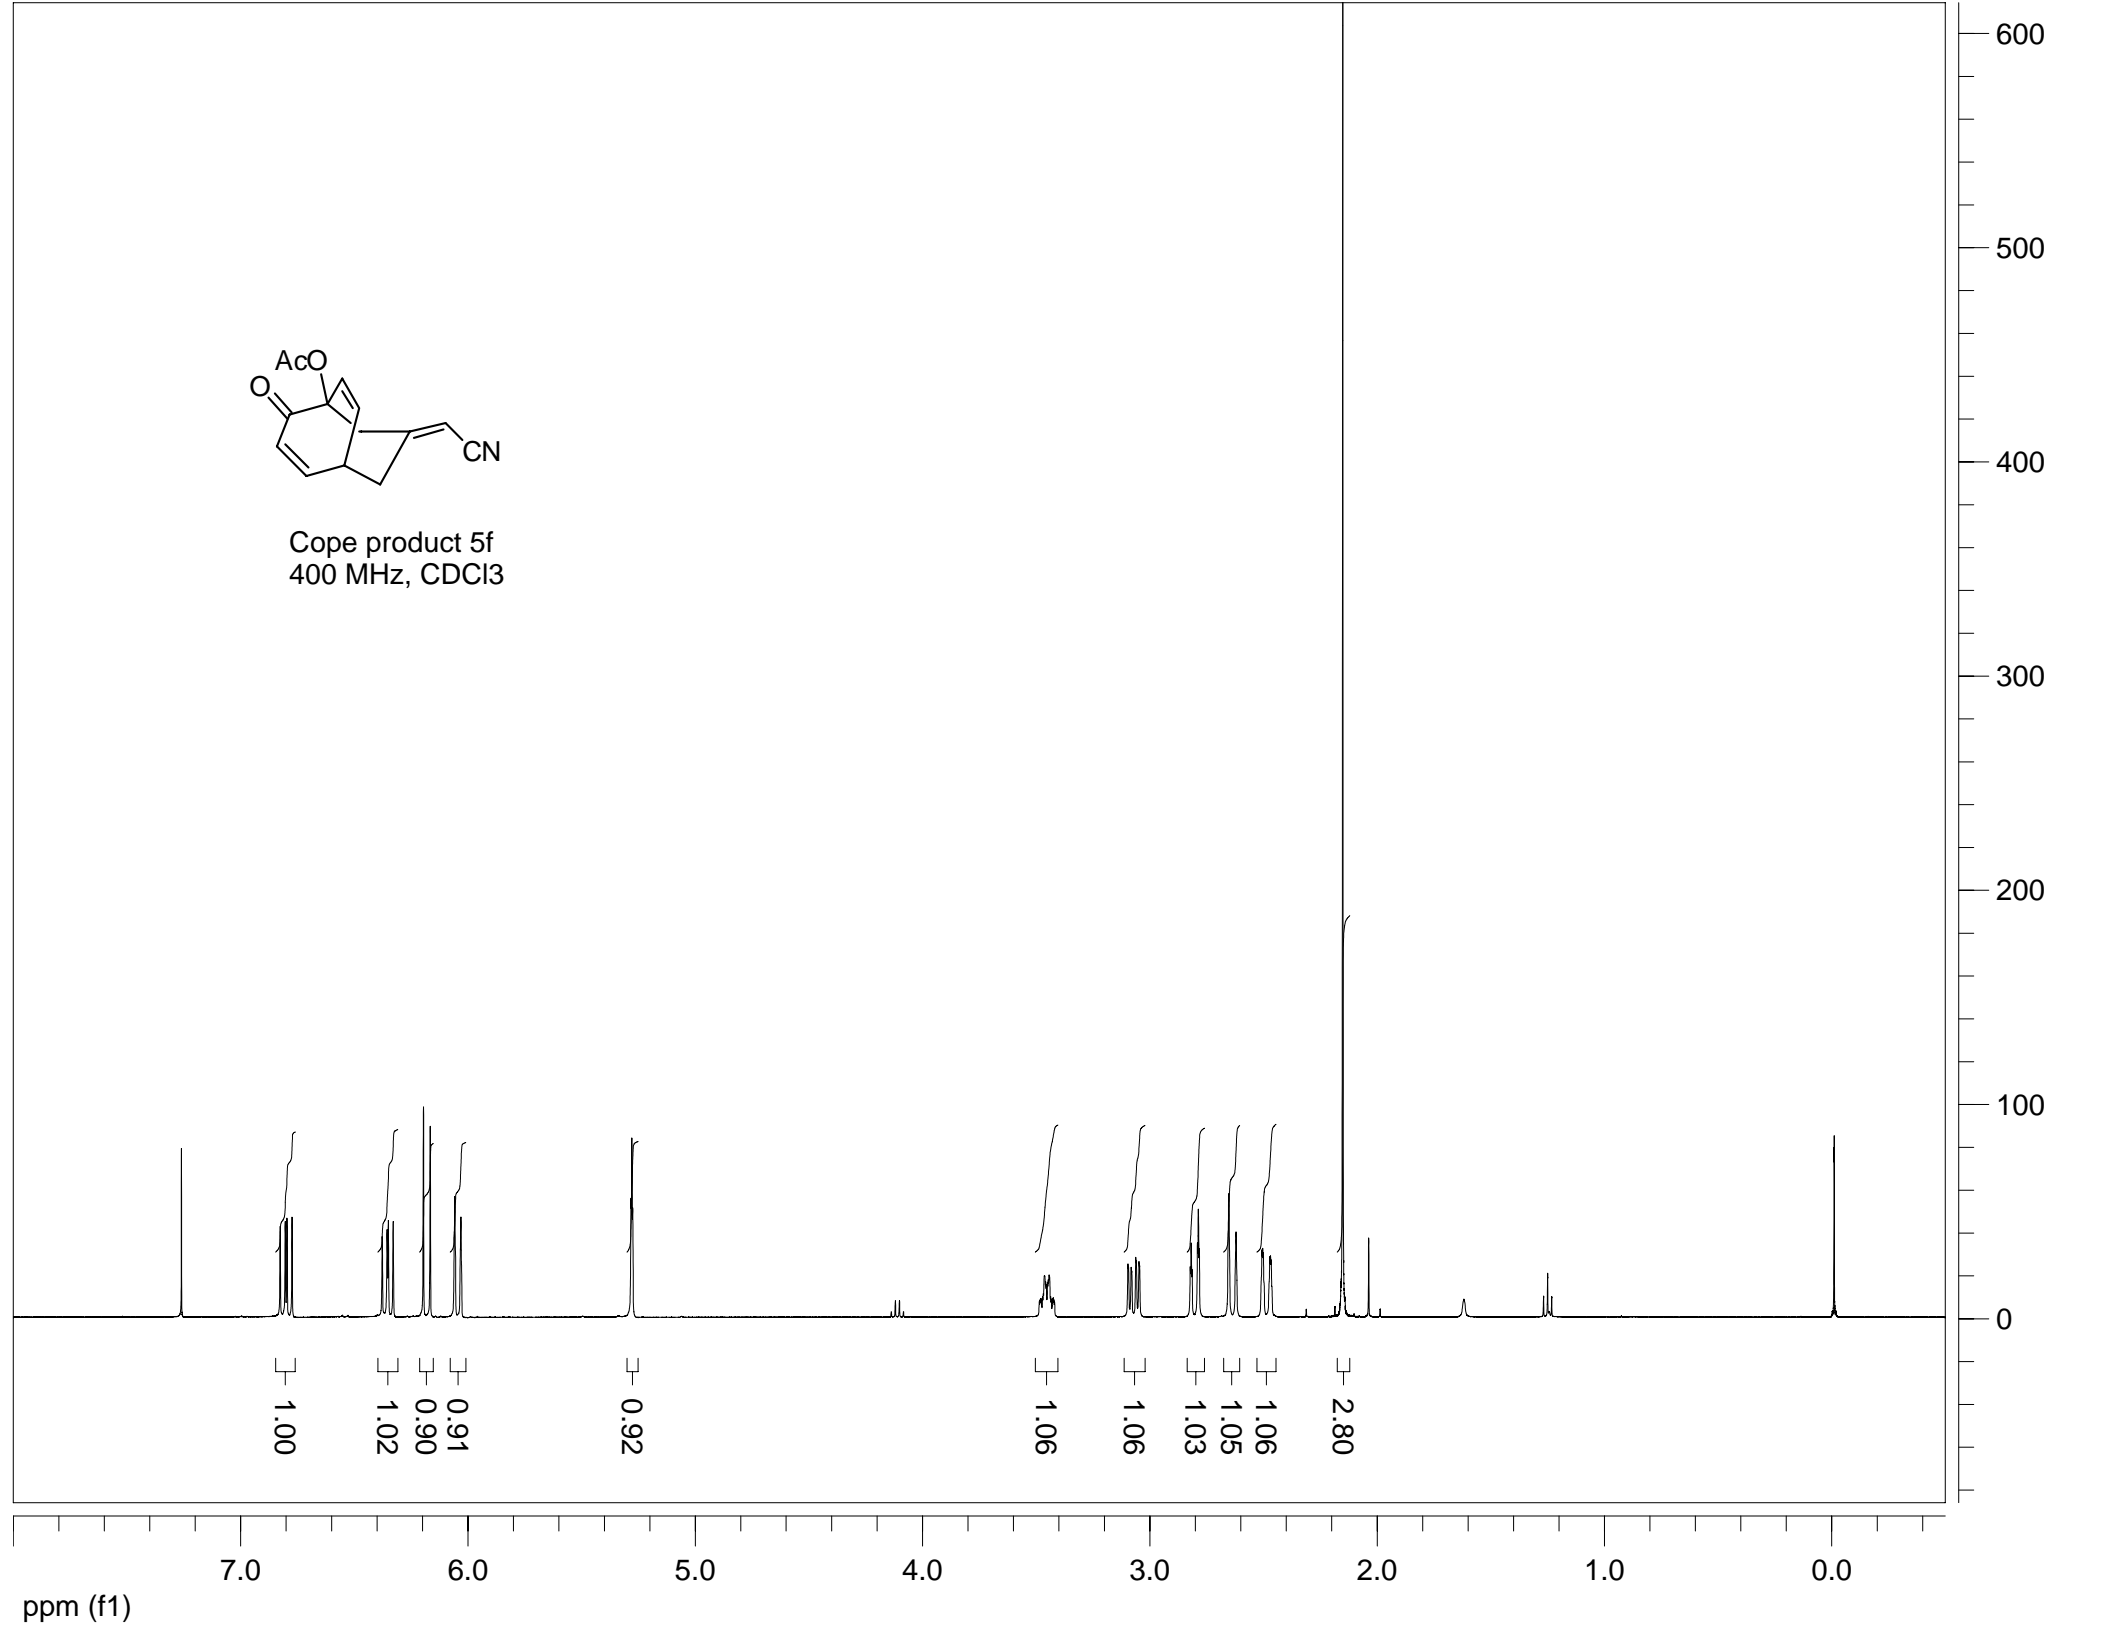



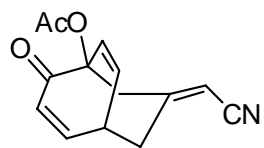

Cope product 5f  
100 MHz, CDCl<sub>3</sub>

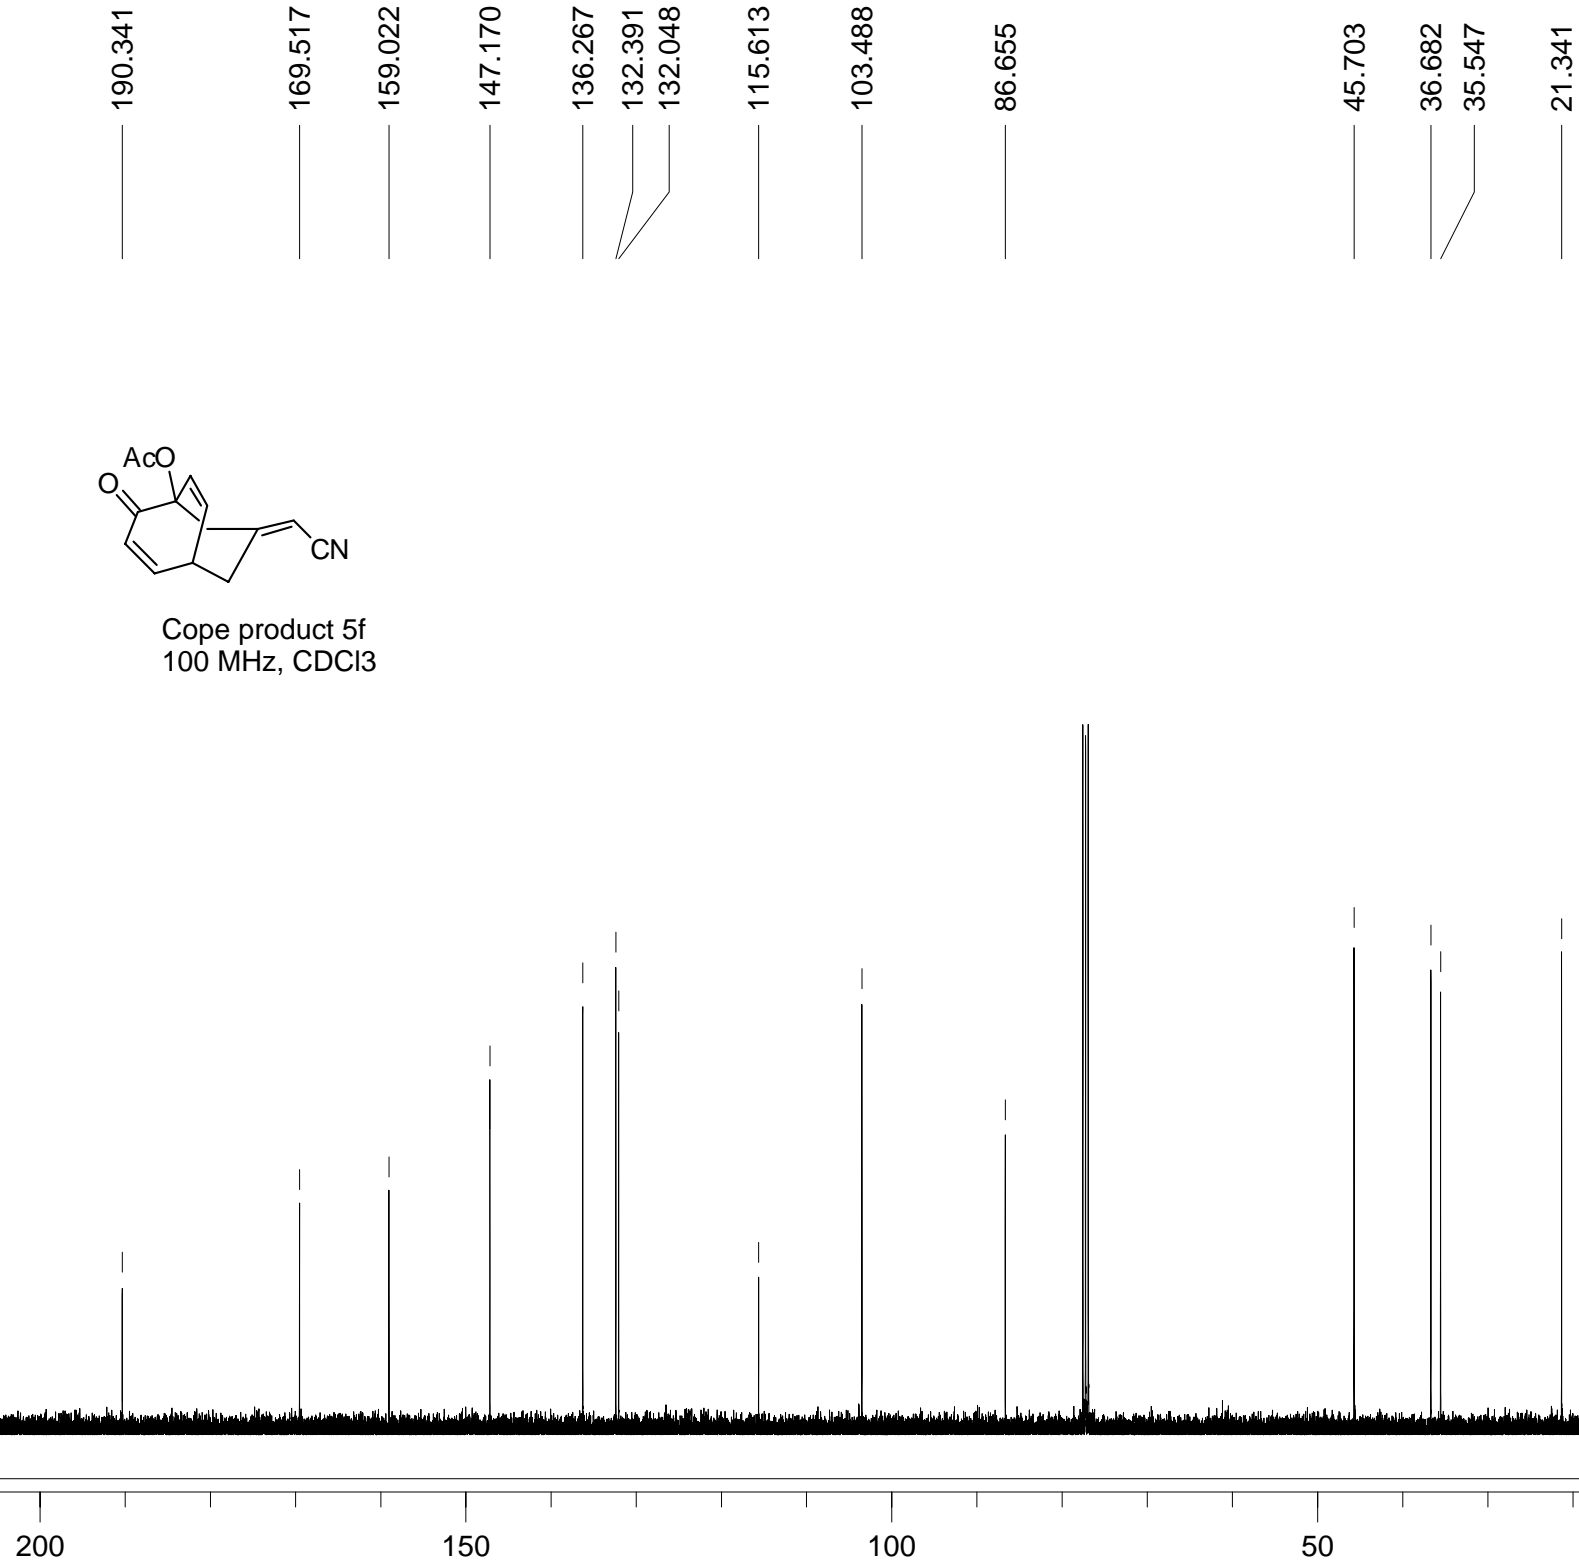

Supplement: NIHMS91001-supplement-2_si_002.pdf [file NIHMS91001-supplement-2_si_002.pdf]
